# Supplementary material for: On the Fundamental Constants of Nature
Source: Preprints.org preprint supplement (doi:10.20944/preprints202006.0017.v2), 2020-09-14
Supplement: Supplementary file 1 [file supplementary]

## Sheet: CONSTANTS
Constant	Symbol	Value (CODATA)	Traditional Units	Natural Unit Value (CODATA Planck Units)	Natural Units	Natural Formula	Traditional formula	Conversion	source	uncertainty	low	high	Concise form	exponent
Planck Length	lP	1.61626e-35	m	-̶̶̶	m	lP	{ ℏ }{ mPc }	-̶̶̶	https://physics.nist.gov/cgi-bin/cuu/Value?plkl|search_for=universal_in!	1.8e-40	1.61624e-35	1.61627e-35	1.616 255(18)	1e-35
Planck Mass	mP	2.17643e-08	kg	-̶̶̶	kg	mP	√[ { ℏc }{ G } ]	-̶̶̶	https://physics.nist.gov/cgi-bin/cuu/Value?plkm|search_for=universal_in!	2.4e-13	2.17641e-08	2.17646e-08	2.176 434(24)	1e-08
Planck Time	tP	5.39125e-44	s	-̶̶̶	s	tP	{ lP }{ c }	-̶̶̶	https://physics.nist.gov/cgi-bin/cuu/Value?plkt|search_for=universal_in!	6e-49	5.39119e-44	5.39131e-44	5.391 247(60)	1e-44
Planck Momentum	pP	6.52479	kgm / s	6.52478	kgm / s	{ lP mP }{ tP }	√[ { ℏc3 }{ G } ], { ℏ }{ lP }	-̶̶̶	-̶̶̶	-̶̶̶	-̶̶̶	-̶̶̶	-̶̶̶	-̶̶̶
Planck Energy	EP	1.95608e+09	kgm2 / s2	1.95608e+09	kgm2 / s2	{ lP2 mP }{ tP2 }	√[ { ℏc5 }{ G } ], { ℏ }{ tP }	-̶̶̶	-̶̶̶	-̶̶̶	-̶̶̶	-̶̶̶	-̶̶̶	-̶̶̶
quantum constant	lP mP	3.51767e-43	kgm	3.51767e-43	kgm	lP mP	{ ℏ }{ c }	-̶̶̶	-̶̶̶	-̶̶̶	-̶̶̶	-̶̶̶	-̶̶̶	-̶̶̶
mass density	lP / mP	7.42616e-28	m / kg	7.42616e-28	m / kg	{ lP }{ mP }	{ G }{ c2 }	-̶̶̶	-̶̶̶	-̶̶̶	-̶̶̶	-̶̶̶	-̶̶̶	-̶̶̶
mass-time constant	mP tP	1.17337e-51	kg s	1.17337e-51	kg s	mP tP	{ ℏ }{ c2 }	-̶̶̶	-̶̶̶	-̶̶̶	-̶̶̶	-̶̶̶	-̶̶̶	-̶̶̶
speed of light	c	299792458	m / s	2.99792e+08	m / s	{ lP }{ tP }	-̶̶̶	-̶̶̶	https://physics.nist.gov/cgi-bin/cuu/Value?c	exact	-̶̶̶	-̶̶̶	-̶̶̶	-̶̶̶
Planck Constant	h	6.62607e-34	kgm2 / s	6.62607e-34	kgm2 / s	2π lP pP, 2π EP tP	-̶̶̶	-̶̶̶	https://physics.nist.gov/cgi-bin/cuu/Value?h	exact	-̶̶̶	-̶̶̶	-̶̶̶	-̶̶̶
reduced Planck Constant	ℏ	1.05457e-34	kgm2 / s	1.05457e-34	kgm2 / s	lP pP, EP tP	-̶̶̶	-̶̶̶	https://physics.nist.gov/cgi-bin/cuu/Value?hbar	exact	-̶̶̶	-̶̶̶	-̶̶̶	-̶̶̶
gravitational constant	G	6.6743e-11	m3 / kgs2	6.6743e-11	m3 / kgs2	{ lP3 }{ mP tP2 }	-̶̶̶	-̶̶̶	https://physics.nist.gov/cgi-bin/cuu/Value?bg	1.5e-15	6.67415e-11	6.67445e-11	6.674 30(15)	1e-11
Planck Temperature	TP	1.41678e+32	K	-̶̶̶	-̶̶̶	TP	{mPc2}{k}, {√[ {ℏc5}{G} ]} {k}	-̶̶̶	https://physics.nist.gov/cgi-bin/cuu/Value?eqplktmp	1.6e-05	1.41678e+32	1.41678e+32	1.416 784(16)	1e+32
fine-structure constant	α	0.00729735	dimensionless	-̶̶̶	-̶̶̶	α	{ e2 }{ 4πε0ℏc }	-̶̶̶	https://physics.nist.gov/cgi-bin/cuu/Value?eqalph	1.1e-12	0.00729735	0.00729735	7.297 352 569 3(11)	0.001
Inverse fine-structure constant	α-1	137.035	dimensionless	-̶̶̶	-̶̶̶	{ 1 }{ α }	{ 4πε0ℏc }{ e2 }	-̶̶̶	https://physics.nist.gov/cgi-bin/cuu/Value?eqalphinv	2.1e-08	137.035	137.035	137.035 999 084(21)	1
Boltzmann Constant	kB	1.38065e-23	J / K	-̶̶̶	-̶̶̶	kB	-̶̶̶	-̶̶̶	https://physics.nist.gov/cgi-bin/cuu/Value?k	exact	-̶̶̶	-̶̶̶	-̶̶̶	-̶̶̶
Avagadro constant	NA	6.02214e+23	/ mol	-̶̶̶	-̶̶̶	-̶̶̶	-̶̶̶	-̶̶̶	https://physics.nist.gov/cgi-bin/cuu/Value?na	exact	-̶̶̶	-̶̶̶	-̶̶̶	-̶̶̶
Planck Charge	qP	1.87555e-18	C	5.39125e-44	s	tP	√[ 4πε0ℏc ], { e }{ √α }	2.87449e-26	-̶̶̶	-̶̶̶	-̶̶̶	-̶̶̶	-̶̶̶	-̶̶̶
elementary charge	e	1.60218e-19	C	4.60545e-45	s	tP √α	{ 4πℏα }{ µ0 c }	2.87449e-26	https://physics.nist.gov/cgi-bin/cuu/Value?e	exact	-̶̶̶	-̶̶̶	-̶̶̶	-̶̶̶
impedance of vacuum	Z0	376.73	Ω	4.5594e+53	kgm2 / s3	{ 4π EP }{ tP }	µ0 c	1.21025e+51	https://physics.nist.gov/cgi-bin/cuu/Value?eqz0	5.7e-08	376.73	376.73	376.730 313 668(57)	1
electric permittivity	ε0	8.85419e-12	F / m	7.31597e-63	s4 / kgm3	{ tP }{ 4π pP c2 }, { 1 }{ 4π FP c2 }	{ 1 }{ µc2 }	8.26272e-52	https://physics.nist.gov/cgi-bin/cuu/Value?eqep0	1.3e-21	8.85419e-12	8.85419e-12	8.854 187 812 8(13)	1e-12
Coulomb constant	ke	8.98755e+09	Nm2 / C2	1.08772e+61	kgm3 / s4	{ pP c2 }{ tP }, FP c2	{ 1 }{ 4π ε0 }	1.21026e+51	-̶̶̶	-̶̶̶	-̶̶̶	-̶̶̶	-̶̶̶	-̶̶̶
magnetic permeability	µ0	1.25664e-06	N / A2	1.52085e+45	kgm / s2	{ 4π pP }{ tP }, 4π FP	{ 4παℏ }{ e2c }	1.21026e+51	https://physics.nist.gov/cgi-bin/cuu/Value?eqmu0	1.9e-16	1.25664e-06	1.25664e-06	1.256 637 062 12(19)	1e-06
Fermi Coupling Constant	GF / (ℏc)3	1.16638e-05	Ge / V2		Ge / V2	{ GF }{ lP3 EP3 }	{ GF }{ ℏ3c3 }	-̶̶̶	https://physics.nist.gov/cgi-bin/cuu/Value?gf	6e-12	1.16638e-05	1.16638e-05	1.166 378 7(6)	1e-05
Stefan-Boltzmann constant	σ	5.67037e-08	W / m2 K4	5.67038e-08	W / m2 K4	{ π2 kB4 }{ 60 lP3 pP EP2 }	{ π2 kB4 }{ 60 ℏ3c2 }	-̶̶̶	https://physics.nist.gov/cgi-bin/cuu/Value?eqsigma	exact	-̶̶̶	-̶̶̶	-̶̶̶	-̶̶̶
hyperfine transition Cs-133	ΔvCs	9192631770	Hz	-̶̶̶	Hz	-̶̶̶	-̶̶̶	-̶̶̶	https://physics.nist.gov/cgi-bin/cuu/Value?nucs	exact	-̶̶̶	-̶̶̶	-̶̶̶	-̶̶̶
Josephson Constant	KJ	4.83598e+14	Hz / V	1.3901e-11	kgm2 / s2	{ √α }{ π EP }	{ 2e }{ h }	2.8745e-26	https://physics.nist.gov/cgi-bin/cuu/Value?eqkjos	exact	-̶̶̶	-̶̶̶	-̶̶̶	-̶̶̶
von Klitzing constant	Rk	25812.8	Ω	3.12401e+55	kgm2 / s3	{ 2π EP }{ tP α }	{ 2πℏ }{ e2 }, { µ0c }{ 2α }	1.21025e+51	https://physics.nist.gov/cgi-bin/cuu/Value?eqrk	exact	-̶̶̶	-̶̶̶	-̶̶̶	-̶̶̶
Faraday constant	F	96485.3	C / mol	2.77347e-21	s / mol	NA tP √α	NA e	2.87449e-26	https://physics.nist.gov/cgi-bin/cuu/Value?eqf	exact	-̶̶̶	-̶̶̶	-̶̶̶	-̶̶̶
conductance quantum	G0	7.74809e-05	S	6.40203e-56	s3 / kgm2	{ α tP }{ π EP }	{ 2e2 }{ 2πℏ }	8.26272e-52	https://physics.nist.gov/cgi-bin/cuu/Value?eqconqu2e2sh	exact	-̶̶̶	-̶̶̶	-̶̶̶	-̶̶̶
Hartree energy	Eh	4.35974e-18	kgm2 / s2	4.35974e-18	kgm2 / s2	me α2 c2	me α2 c2, { e2 }{ 4πε0a0 }	-̶̶̶	https://physics.nist.gov/cgi-bin/cuu/Value?eqhr	8.5e-30	4.35974e-18	4.35974e-18	4.359 744 722 207 1(85)	1e-18
magnetic flux quantum	φ0	2.06783e-15	Wb	7.19373e+10	kgm2 / s2	{ π EP }{ √α }	{ 2πℏ }{ 2e }	3.47887e+25	https://physics.nist.gov/cgi-bin/cuu/Value?eqflxquhs2e	exact	-̶̶̶	-̶̶̶	-̶̶̶	-̶̶̶
quantum of circulation	πℏ / me	0.000363695	m2 / s	0.000363695	m2 / s	{ π lP pP }{ me }	{ πℏ }{ me }	-̶̶̶	https://physics.nist.gov/cgi-bin/cuu/Value?qucirchs2me	1.1e-13	0.000363695	0.000363695	3.636 947 551 6(11)	0.0001
weak mixing angle	sin2 θW	0.2229	-̶̶̶	-̶̶̶	-̶̶̶	-̶̶̶	1-( { mW }{ mZ } )2	-̶̶̶	https://physics.nist.gov/cgi-bin/cuu/Value?eqsin2th	0.0003	0.2226	0.2232	0.222 90(30)	1
Rydberg constant	R∞	1.09737e+07	1 / m	1.09737e+07	1 / m	{ me α2 }{ 4π lP mP }	{ me α2 c }{ 2h }	-̶̶̶	https://physics.nist.gov/cgi-bin/cuu/Value?ryd	2.1e-05	1.09737e+07	1.09737e+07	10,973,731.568 160(21)	1
Rydberg energy (eV)	hcR∞	13.6057	eV	-̶̶̶	-̶̶̶	½ me α2 c2	½ me α2 c2	-̶̶̶	https://physics.nist.gov/cgi-bin/cuu/Value?eqrydhcev	2.6e-11	13.6057	13.6057	13.605 693 122 994(26)	1
Rydberg energy (Joules)	hcR∞	2.17987e-18	kgm2 / s2	-̶̶̶	-̶̶̶	½ me α2 c2	½ me α2 c2	-̶̶̶	https://physics.nist.gov/cgi-bin/cuu/Value?eqrydhcj	4.2e-30	2.17987e-18	2.17987e-18	2.179 872 361 103 5(42)	1e-18
Bohr Magneton	µB	9.27401e-24	J / T	2.66581e-49	m2	{ √α lP2 mP }{ 2me }	{ eℏ }{ 2me }	2.87449e-26	https://physics.nist.gov/cgi-bin/cuu/Value?eqmub	2.8e-33	9.27401e-24	9.27401e-24	9.274 010 078 3(28)	1e-24
Bohr radius	a0	5.29177e-11	m	5.29177e-11	m	{ ƛC }{ α }	{ℏ}{αmec}, { 4πε0ℏ2 }{ mee2 }	-̶̶̶	https://physics.nist.gov/cgi-bin/cuu/Value?eqbohrrada0	8e-21	5.29177e-11	5.29177e-11	5.291 772 109 03(80)	1e-11
classical electron radius	re	2.81794e-15	m	-̶̶̶	-̶̶̶	-̶̶̶	α2 a0, α ƛC	-̶̶̶	https://physics.nist.gov/cgi-bin/cuu/Value?eqre	1.3e-24	2.81794e-15	2.81794e-15	2.817 940 326 2(13)	1e-15
electron Compton wavelength	λC	2.42631e-12	m	-̶̶̶	-̶̶̶	-̶̶̶	-̶̶̶	-̶̶̶	https://physics.nist.gov/cgi-bin/cuu/Value?ecomwl	7.3e-22	2.42631e-12	2.42631e-12	2.426 310 238 67(73)	1e-12
electron reduced Compton wavelength	ƛC	3.86159e-13	m	-̶̶̶	-̶̶̶	-̶̶̶	{ ℏ }{ me c }, α a0	-̶̶̶	https://physics.nist.gov/cgi-bin/cuu/Value?eqecomwlbar	1.2e-22	3.86159e-13	3.86159e-13	3.861 592 679 6(12)	1e-13
electron g factor	ge	-2.00232	-̶̶̶	-̶̶̶	-̶̶̶	-̶̶̶	{ 2µe }{ µB }	-̶̶̶	https://physics.nist.gov/cgi-bin/cuu/Value?eqgem	1.7e-13	-2.00232	-2.00232	-2.002 319 304 362 56(35)	1
electron magnetic moment	µe	-9.28476e-24	J / T	-̶̶̶	-̶̶̶	-̶̶̶	-̶̶̶	-̶̶̶	https://physics.nist.gov/cgi-bin/cuu/Value?muem	2.8e-33	-9.28476e-24	-9.28476e-24	-9.284 764 704 3(28)	1e-24
electron mass	me	9.10938e-31	kg	-̶̶̶	-̶̶̶	-̶̶̶	-̶̶̶	-̶̶̶	https://physics.nist.gov/cgi-bin/cuu/Value?me	2.8e-40	9.10938e-31	9.10938e-31	9.109 383 701 5(28)	1e-31
electron mass energy equivalent	me c2	8.18711e-14	J	-̶̶̶	-̶̶̶	-̶̶̶	-̶̶̶	-̶̶̶	https://physics.nist.gov/cgi-bin/cuu/Value?mec2	2.5e-23	8.18711e-14	8.18711e-14	8.187 105 776 9(25)	1e-14
electron mass energy equivalent in MeV	me c3	0.510999	MeV	-̶̶̶	-̶̶̶	-̶̶̶	-̶̶̶	-̶̶̶	https://physics.nist.gov/cgi-bin/cuu/Value?eqmec2mev	1.5e-10	0.510999	0.510999	0.510 998 950 00(15)	1
muon mass	mµ	1.88353e-28	kg	-̶̶̶	-̶̶̶	-̶̶̶	-̶̶̶	-̶̶̶	https://physics.nist.gov/cgi-bin/cuu/Value?mmu	4.2e-36	1.88353e-28	1.88353e-28	1.883 531 627(42)	1e-28
muon Compton wavelength	λC, µ	1.17344e-14	m	-̶̶̶	-̶̶̶	-̶̶̶	-̶̶̶	-̶̶̶	https://physics.nist.gov/cgi-bin/cuu/Value?mcomwl	2.6e-22	1.17344e-14	1.17344e-14	1.173 444 110(26)	1e-14
muon reduced Compton wavelength	ƛC, µ	1.86759e-15	m	-̶̶̶	-̶̶̶	-̶̶̶	-̶̶̶	-̶̶̶	https://physics.nist.gov/cgi-bin/cuu/Value?eqmcomwlbar	4.2e-23	1.86759e-15	1.86759e-15	1.867 594 306(42)	1e-15
muon g factor	gµ-	-2.00233	-̶̶̶	-̶̶̶	-̶̶̶	-̶̶̶	-̶̶̶	-̶̶̶	https://physics.nist.gov/cgi-bin/cuu/Value?gmum	1.3e-09	-2.00233	-2.00233	-2.002 331 841 8(13)	1
muon magnetic moment	µµ	-4.49045e-26	J / T	-̶̶̶	-̶̶̶	-̶̶̶	-̶̶̶	-̶̶̶	https://physics.nist.gov/cgi-bin/cuu/Value?mumum	1e-33	-4.49045e-26	-4.49045e-26	-4.490 448 30(10)	1e-26
tau mass	mτ	3.16754e-27	kg	-̶̶̶	-̶̶̶	-̶̶̶	-̶̶̶	-̶̶̶	https://physics.nist.gov/cgi-bin/cuu/Value?mtau	2.1e-31	3.16733e-27	3.16775e-27	3.167 54(21)	1e-27
tau Compton wavelength	λC, τ	6.97771e-16	m	-̶̶̶	-̶̶̶	-̶̶̶	-̶̶̶	-̶̶̶	https://physics.nist.gov/cgi-bin/cuu/Value?tcomwl	4.7e-20	6.97724e-16	6.97818e-16	6.977 71(47)	1e-16
reduced tau Compton wavelength	ƛC, τ	1.11054e-16	m	-̶̶̶	-̶̶̶	-̶̶̶	-̶̶̶	-̶̶̶	https://physics.nist.gov/cgi-bin/cuu/Value?eqtcomwlbar	7.5e-21	1.11046e-16	1.11061e-16	1.110 538(75)	1e-16
joule-electronvolt relationship	1 J	6.24151e+18	eV	-̶̶̶	-̶̶̶	-̶̶̶	-̶̶̶	-̶̶̶	https://physics.nist.gov/cgi-bin/cuu/Value?eqjev	exact	-̶̶̶	-̶̶̶	-̶̶̶	-̶̶̶
proton mass	mp	1.67262e-27	kg	-̶̶̶	-̶̶̶	-̶̶̶	-̶̶̶	-̶̶̶	https://physics.nist.gov/cgi-bin/cuu/Value?mp	5.1e-37	1.67262e-27	1.67262e-27	1.672 621 923 69(51)	1e-27
proton mass energy equivalent MeV	mp	938.272	MeV	-̶̶̶	-̶̶̶	-̶̶̶	-̶̶̶	-̶̶̶	https://physics.nist.gov/cgi-bin/cuu/Value?eqmpc2mev	2.9e-07	938.272	938.272	938.272 088 16(29)	1
neutron mass	mn	1.67493e-27	kg	-̶̶̶	-̶̶̶	-̶̶̶	-̶̶̶	-̶̶̶	https://physics.nist.gov/cgi-bin/cuu/Value?mn	9.5e-37	1.67493e-27	1.67493e-27	1.674 927 498 04(95)	1e-27
Voltage potential	VP	1.04294e+27	V	3.62825e+52	kgm2 / s3	{ EP }{ tP }	√[ { c4 }{ 4πε0G } ]	3.47887e+25	-̶̶̶	-̶̶̶	-̶̶̶	-̶̶̶	-̶̶̶	-̶̶̶
Current potential	IP	3.47887e+25	A	1	dimensionless	{ tP }{ tP }	√[ { 4πε0c6 }{ G } ]	2.87449e-26	-̶̶̶	-̶̶̶	-̶̶̶	-̶̶̶	-̶̶̶	-̶̶̶
Inductance potential	LP	1.61626e-42	H	1.95608e+09	kgm2 / s2	EP	{ 1 }{ 4πε0 } √[ { ℏG }{ c7 } ]	1.21026e+51	-̶̶̶	-̶̶̶	-̶̶̶	-̶̶̶	-̶̶̶	-̶̶̶
Magnetic inductance potential	BP	2.15243e+53	T	7.48802e+78	kg / s2	{ mP }{ tP2 }	√[ { c5 }{ 4πε0ℏG2 } ]	3.47887e+25	-̶̶̶	-̶̶̶	-̶̶̶	-̶̶̶	-̶̶̶	-̶̶̶
Impedence potential	ZP	29.9792	Ω	3.62825e+52	kgm2 / s3	{ EP }{ tP }	{ 1 }{ 4πε0c }	1.21025e+51	-̶̶̶	-̶̶̶	-̶̶̶	-̶̶̶	-̶̶̶	-̶̶̶
Capacitance potential	CP	1.79833e-45	F	1.48591e-96	s4 / kgm2	{ tP2 }{ EP }	4πε0 √[ { ℏG }{ c3 } ]	8.26272e-52	-̶̶̶	-̶̶̶	-̶̶̶	-̶̶̶	-̶̶̶	-̶̶̶
Conductance potential	GP	0.0333564	S	2.75615e-53	s3 / kgm2	{ tP }{ EP }	4πε0c	8.26272e-52	-̶̶̶	-̶̶̶	-̶̶̶	-̶̶̶	-̶̶̶	-̶̶̶
Magnetic Flux potential	φP	5.62275e-17	Wb	1.95608e+09	kgm2 / s2	EP	√[ { ℏ }{ 4πcε0 } ]	3.47887e+25	-̶̶̶	-̶̶̶	-̶̶̶	-̶̶̶	-̶̶̶	-̶̶̶
Force potential	FP	1.21026e+44	kgm / s2	-̶̶̶	-̶̶̶	{ pP }{ tP }, { EP }{ lP }	-̶̶̶	-̶̶̶	-̶̶̶	-̶̶̶	-̶̶̶	-̶̶̶	-̶̶̶	-̶̶̶
Acceleration potential	aP	5.56073e+51	m / s2	-̶̶̶	-̶̶̶	{ lP }{ tP2 }	-̶̶̶	-̶̶̶	-̶̶̶	-̶̶̶	-̶̶̶	-̶̶̶	-̶̶̶	-̶̶̶
Area potential		2.61228e-70	m2	-̶̶̶	-̶̶̶	lP2	-̶̶̶	-̶̶̶	-̶̶̶	-̶̶̶	-̶̶̶	-̶̶̶	-̶̶̶	-̶̶̶
Pressure potential		4.63295e+113	kg / ms2	-̶̶̶	-̶̶̶	{ FP }{ lP2 }	-̶̶̶	-̶̶̶	-̶̶̶	-̶̶̶	-̶̶̶	-̶̶̶	-̶̶̶	-̶̶̶
Volume potential		4.22211e-105	m3	-̶̶̶	-̶̶̶	lP3	-̶̶̶	-̶̶̶	-̶̶̶	-̶̶̶	-̶̶̶	-̶̶̶	-̶̶̶	-̶̶̶
Power potential		3.62825e+52	kgm2 / s3	-̶̶̶	-̶̶̶	{ EP }{ tP }	-̶̶̶	-̶̶̶	-̶̶̶	-̶̶̶	-̶̶̶	-̶̶̶	-̶̶̶	-̶̶̶

## Sheet: Tables
	Table 1
	Constant		Unit	Value	-
	ℏ =		lP	1.61626e-35	m
		×	mP	2.17643e-08	kg
		×	c	299792458	m / s
		=		1.05457e-34	kgm2 / s
	G =		lP	1.61626e-35	m
		÷	mP	2.17643e-08	kg
		×	c	299792458	m/s
		×	c	299792458	m/s
		=		6.6743e-11	m3 / kgs2
	Table 2
	Physical property	Potential	Operators	Natural Formula	Composite Formula
	Length	lP	M / mP	rs = 2{M}{mP} lP	rs = { 2GM }{ c2 }
	Energy	EP	lP / r, M / mP, m / mP	Ug = - { lP }{ r } { M }{ mP } { m }{ mP } EP	Ug = -{ GMm }{ r }
	Acceleration	aP	lP / r, M / mP, lP / r	g = - { lP }{ r }, { M }{ mP }, { lP }{ r } aP	g = -{ GM }{ r2 }
	Force	FP	lP / r, M / mP, lP / r, m / mP	F = { lP }{ r }, { M }{ mP }, { lP }{ r }, { m }{ mP } FP	F = { GMm }{ r2 }
	Escape Velocity	c	lP / r, M / mP	ve = √[ 2 { lP }{ r }, { M }{ mP } ] c	ve = - √[ { 2GM }{ r } ]
	Table 3
	Physical property	Potential	Operators	Natural Formula	Composite Formula
	Photon Momentum	pP	{ lP }{ ƛ }	p = { lP }{ ƛ } pP	p = { ℏ }{ ƛ }
	Photon Energy	EP	{ lP }{ ƛ }	E = { lP }{ ƛ } EP	E = { ℏc }{ ƛ }
	Compton Wavelength	lP	{ m0 }{ mP }	ƛC = { m0 }{ mP } lP	ƛC = { ℏ }{ mc }
	de Broglie Wavelength	lP	{ m0 }{ mP }, { v }{ c }	ƛ = { m0 }{ mP }, { v }{ c } lP	ƛ = { ℏ }{ mv }
	Table 4
	Physical property	Potential	Value
	Length	lP	1.61626e-35	m
	Mass	mP	2.17643e-08	kg
	Time	tP	5.39125e-44	s
	Momentum	{ lP mP }{ tP }	6.52479	kgm/s
	Energy	{ lP2 mP }{ tP2 }	1.95608e+09	kgm2 / s2
	Velocity	{ lP }{ tP }	299792458	m / s
	Acceleration	{ lP }{ tP2 }	5.56073e+51	m / s2
	Force	{ lP mP }{ tP2 }	1.21026e+44	kgm / s2
	Action	{ lP2 mP }{ tP }	1.05457e-34	kgm2 / s
	Mass Density	{ lP }{ mP }	7.42616e-28	m / kg
	Mass Length	lP mP	3.51767e-43	kgm
	Table 5
	Lepton	βm	lP / βm (m)	βm mP (kg)	Interval Between	Wavelength ratio	Rest mass ratio
	e	4.18546e-23	3.86159e-13	9.10938e-31	-̶̶̶	-̶̶̶	-̶̶̶
	µ	8.65421e-21	1.86759e-15	1.88353e-28	µ and e	206.768	206.768
	τ	1.45538e-19	1.11054e-16	3.16754e-27	τ and µ	16.817	16.817
	Table 6
	Operator Name	Symbol	Photon	Charged Leptons
	Wavelength operator	βλ	{ lP }{ ƛ }	{ lP }{ ƛ }
	Rest Mass operator	βm	-̶̶̶	{ lP }{ ƛC}, { m0 }{ mP }
	Momentum operator	βp	{ lP }{ ƛ }	{ ƛC }{ ƛ }, {m }{ m0 }, α
	Velocity operator	βv	1	{ v }{ c }, { ƛ tP }{ lP T }
	Spin operator	βs	1	{ 1 }{ 2 }
	Table 7
	Operator Name	Symbol	Formula
	Mass Density operator	βρ	{ lP }{ r }, { M }{ mP }
	Distance operator	βr	{ lP }{ r }
	Table 8
	Constant	Symbol	Standard form	Elementary form	Alt forms	Value
	Reduced Planck constant	ℏ	-̶̶̶	{ lP2 mP }{ tP }	lP pP, EP tP	1.05457e-34	kgm2 / s
	Gravitational constant	G	-̶̶̶	{ lP3 }{ mP tP2 }	{ lP }{ mP } c2	6.6743e-11	m3 / kgs2
	Speed of light	c	{ lP }{ tP }	{ lP }{ tP }	-̶̶̶	299792458	m / s
	Fine-structure	α	{ e2 }{ 4πε0ℏc }	-̶̶̶	-̶̶̶	0.00729735	dimensionless
	Rydberg constant	R∞	{ me α2 c }{ 2h }	{ 1 }{ 2 } { 1 }{ 2π } { me }{ mP } α2 { 1 }{ lP }	-̶̶̶	1.09737e+07	1/m
	Rydberg energy	hc R∞	{ 1 }{ 2 } me α2 c2	{ 1 }{ 2 } me α2 { lP2 }{ tP2 }	{ 1 }{ 2 } { me }{ mP } α2 EP	2.17987e-18	kgm2/s2
	Table 9
	Photon	βλ (lP / ƛ)	ƛ (m)	m (kg)	T (s)	p (kgm/s)	E (kgm2/s2)	ƛm, pT
	λP	1	1.61626e-35	2.17643e-08	5.39125e-44	6.52478	1.95608e+09	3.51767e-43
	λC τ	1.45538e-19	1.11054e-16	3.16754e-27	3.70435e-25	9.49605e-19	2.84684e-10	3.51767e-43
	λC µ	8.65421e-21	1.86759e-15	1.88353e-28	6.22962e-24	5.64668e-20	1.69283e-11	3.51767e-43
	λC	4.18546e-23	3.86159e-13	9.10938e-31	1.28809e-21	2.73092e-22	8.1871e-14	3.51767e-43
	λH, 1s-2p	8.35361e-28	1.9348e-08	1.81811e-35	6.4538e-17	5.45055e-27	1.63403e-18	3.51767e-43
	ΔvCs	4.95597e-34	0.0326123	1.07864e-41	1.08783e-10	3.23367e-33	9.69429e-25	3.51767e-43
	Table 10
	Lepton	ƛC (m)	m0 (m)	ƛCm0 (kgm)
	e	3.86159e-13	9.10938e-31	3.51767e-43
	µ	1.86759e-15	1.88353e-28	3.51767e-43
	τ	1.11054e-16	3.16754e-27	3.51767e-43
	Table 11
	Max	lP (m)	mP (kg)	tP (s)	pP (kgm/s)	EP (kgm2/s2)	ƛm, pTλ	Δxp, ΔtEk	ƛ / Tλ	Δx / Δt
	1	1.61626e-35	2.17643e-08	5.39125e-44	6.52478	1.95608e+09	lPmP	ℏ	c	c
	βm	ƛC	m0	Tλ	p	Ek	ƛm , pTλ	Δxp, ΔtEk	ƛ / Tλ	Δx / Δt
	4.18546e-23	3.86159e-13	9.10938e-31	1.28809e-21	2.73092e-22	8.1871e-14	lPmP	ℏ	c	c
	βs	ƛC	m0	Tλ	p	Ek	ƛm , pTλ	Δxp, ΔtEk	ƛ / Tλ	Δx / Δt
	0.5	3.86159e-13	9.10938e-31	1.28809e-21	2.73092e-22	4.09355e-14	lPmP	ℏ	c	c
	βp , βv	ƛC	m0	Tλ	p	Ek	ƛm , pTλ	Δxp, ΔtEk	ƛ / Tλ	Δx / Δt
	1	3.86159e-13	9.10938e-31	1.28809e-21	2.73092e-22	4.09355e-14	lPmP	ℏ	c	c
	0.9	4.29066e-13	8.19845e-31	1.43121e-21	2.45783e-22	3.31578e-14	lPmP	ℏ	v	v
	0.5	7.72319e-13	4.55469e-31	2.57618e-21	1.36546e-22	1.02339e-14	lPmP	ℏ	v	v
	0.00729735	5.29177e-11	6.64744e-33	1.76515e-19	1.99285e-24	2.17987e-18	lPmP	ℏ	v	v
	Table 12
	Name	Symmetry	Current	Max Potential	Invariant	Conserved quantity	-
	Length-mass	ƛm = lPmP		lP mP	ƛm	3.51767e-43	kgm
	Mass-momentum	ƛm = pTƛ		lP mP	ƛm	3.51767e-43	kgm
				pPtP	pTƛ	3.51767e-43	kgm
			ƛC / Tƛ	c
	Momentum-energy	ƛp = TEk		lP pP	ƛp	1.05457e-34	kgm2 / s
				tP EP	TE	1.05457e-34	kgm2 / s
			Δx / Δt	c
	Table 13
	Name	Symbol	Operator form	Formula	e.g. natural units	e.g. H1 1s electron	-
	Planck length	lP	-	-	1	1.61626e-35	m	1
	Planck mass	mP	-	-	1	2.17643e-08	kg	1
	Planck time	tP	-	-	1	5.39125e-44	s	1
	Rest mass operator	βm	-	m0 / mP, lP / ƛC	1/10	4.18546e-23	-	0.1
	Momentum operator	βp	-	ƛC / ƛ, m / m0	10 / 25	0.00729735	-	0.4
	Velocity operator	βv	-	ƛ tP / T lP , v / c	10 / 25	0.00729735	-	0.4
	Spin operator	βs	-	1/2	1/2	0.5	-	0.5
	Compton wavelength	ƛC	lP / βm	lP mP / m0	10	3.86159e-13	m	10
	Wavelength	ƛ	lP / βm βp	lP mP / m	25	5.29177e-11	m	25
	Rest Mass	m0	βm mP	lP mP / ƛC	1/10	9.10938e-31	kg	0.1
	Inertial mass	m	βm βp mP	lP mP / ƛ	1/25	6.64744e-33	kg	0.04
	T Lambda	Tλ	tP / (βm βp)	ƛ / c	25	1.76515e-19	s	25
	Momentum	p	βm βp pP	m0 ƛC / Tλ , m ƛ / Tλ	1/25	1.99285e-24	kgm/s	0.04
	Velocity	v	βv (lP / tP)	ƛ / T, Δx / Δt	25 / 62.5	2.18769e+06	m/s	0.4
	Period	T	tP / (βm βp βv)	Tλ ƛ / ƛC	252 / 10	2.41888e-17	s	62.5
	Kinetic energy	Ek	βm βs βp βv EP	m ƛ2 / 2 Tλ T	1/25*252 / 2*25*62.5	2.17987e-18	kgm2 / s2	0.008
	Table 14
	Constant	Symbol	Standard form	Elementary form	Alt forms	MKS value	Units	EM value	Units
	Planck charge	qP	√[ 4πε0ℏc ]	tP	-̶̶̶	5.39125e-44	s	1.87555e-18	C
	Elementary charge	e, q	{ 4πℏα }{ µ0 c }	tP √α	-̶̶̶	4.60545e-45	s	1.60218e-19	C
	Electric permittivity	ε0	{ 1 }{ µc2 }	{ tP4 }{ 4π lP3 mP }	{ tP }{ 4π pP c2 }, { 1 }{ 4π FP c2 }	7.31597e-63	s4/kgm3	8.85419e-12	F / m
	Coulomb constant	ke	{ 1 }{ 4π ε0 }	{ lP3 mP }{ tP4 }	{ pP c2 }{ tP }, FP c2	1.08772e+61	kgm3/s4	8.98755e+09	Nm2 / C2
	Magnetic permeability	µ0	{ 4παℏ }{ e2c }	{ 4π lP mP }{ tP2 }	{ 4π pP }{ tP }, 4π FP	1.52085e+45	kgm/s2	1.25664e-06	N / A2
	Voltage	VP	√[ { c4 }{ 4πε0G } ]	{ lP2 mP }{ tP3 }	{ EP }{ tP }, { EP }{ qP }	3.62825e+52	kgm2/s3	1.04294e+27	V
	Current	IP	√[ { 4πε0c6 }{ G } ]	{ tP }{ tP }	{ qP }{ tP }, { tP }{ qP }	1	dimensionless	3.47887e+25	A
	Inductance	LP	{ 1 }{ 4πε0 } √[ { ℏG }{ c7 } ]	{ lP2 mP }{ tP2 }	EP	1.95608e+09	kgm2/s2	1.61626e-42	H
	Magnetic inductance	BP	√[ { c5 }{ 4πε0ℏG2 } ]	{ mP }{ tP2 }	{ pP }{ lP tP }, { FP }{ lP }	7.48802e+78	kg/s2	2.15243e+53	T
	Conductance	GP	4πε0c	{ tP3 }{ lP2 mP }	{ tP }{ EP }, { qP }{ EP }	2.75615e-53	s3/kgm2	0.0333564	S
	Impedance	ZP	{ 1 }{ 4πε0c }	{ lP2 mP }{ tP3 }	{ EP }{ tP }, { EP }{ qP }	3.62825e+52	kgm2/s3	29.9792	Ω
	Impedance of vacuum	Z0	µ0c	{ 4π lP2 mP }{ tP3 }	{ 4π EP }{ tP }	4.5594e+53	kgm2/s3	376.73	Ω
	Capacitance	CP	4πε0 √[ { ℏG }{ c3 } ]	{ tP4 }{ lP2 mP }	{ tP2 }{ EP }	1.48591e-96	s4/kgm2	1.79833e-45	F
	Magnetic flux quantum	Φ0	{ 2πℏ }{ 2e }	{ π lP2 mP }{ tP2 √α }	{ π EP }{ √α }	7.19373e+10	kgm2/s2	2.06783e-15	Wb
	von Klitzing constant	RK	{ 2πℏ }{ e2 }, { µ0c }{ 2α }	{ 2π lP2 mP }{ tP3 α }	{ 2π EP }{ α tP }	3.12401e+55	kgm2/s3	25812.8	Ω
	Josephson constant	KJ	{ 2e }{ h }	{ tP2 √α }{ π lP2 mP }	{ √α }{ π EP }	1.3901e-11	s2/kgm2	483597848400000	Hz / V
	Bohr magneton	µB	{ eℏ }{ 2me }	{ √α lP2 mP }{ 2me }	-̶̶̶	2.66581e-49	m2	9.27401e-24	J / T
	Conductance quantum	G0	{ 2e2 }{ 2πℏ }	{ tP3 α }{ π lP2 mP }	{ α tP }{ π EP }	6.40203e-56	s3/kgm2	7.74809e-05	S
	Table 15
	EM Unit	Symbol	Formula	Conversion	MKS units
	coulomb	q, e	qP / qP	2.87449e-26	s
	ampere	A	IP / IP	2.87449e-26	dimensionless
	volt	V	VP / VP	3.47887e+25	kgm2 / s3
	tesla	T	BP / BP	3.47887e+25	kg / s2
	weber	Wb	V s	3.47887e+25	kgm2 / s2
	ohm	Ω	ZP / ZP	1.21025e+51	kgm2 / s3
	henry	H	LP / LP	1.21026e+51	kgm2 / s2
	farad	F	CP / CP	8.26272e-52	s4 / kgm2
	siemen	S	GP / GP	8.26272e-52	s3 / kgm2
	Table 16
	Reduction	Operator(s)	Formula	Mechanical	Electrostatic	Gravitational
	Planck Force	FP		1.21026e+44	1.21026e+44	1.21026e+44
	Electron rest mass	βm	m0 / mP	4.18546e-23		4.18546e-23
	Proton rest mass	βm	m0 / mP			7.68515e-20
	Electron inertial mass	βp	m0 / m	0.00729735
	Electron Period	βm βp βv	Tλ ƛ / ƛC	2.22882e-27
	Distance	βr	lP / r		3.05428e-25	3.05428e-25
	Distance	βr	lP / r		3.05428e-25	3.05428e-25
	Electron charge	βq	√α		0.0854245
	Proton charge	βq	√α		0.0854245
	Total Reductions			6.80743e-52	6.80742e-52	3.00064e-91
	Force			8.23872e-08	8.23872e-08	3.63154e-47
	Table 17
	Constant	Exact value	Formula	Planck unit value	Variance
	c	299792458	{ lP }{ tP }	2.99792e+08	1
	ℏ	1.05457e-34	{ lP2 mP }{ tP }	1.05457e-34	1
	ℏ / c	3.51767e-43	lP mP	3.51767e-43	1
	ℏ / c2	1.17337e-51	mP tP	1.17337e-51	1
	Table 18
	Formula	Value
	h / c	2.21022e-42
	λC me	2.21022e-42
	λC mµ	2.21022e-42
	λC mτ	2.21022e-42
	2π lP mP	2.21022e-42
	Table 18
	Planck length	Planck Mass	Planck Time
	given	{ ℏ }{ lPc }	{ lP }{ c }
	{ ℏ }{ mPc }	given	{ lP }{ c }
	tPc	{ ℏ }{ lPc }	given
	Proportionally consistent Planck unit sets
	Indexed by length	Formula	Value	CODATA value	Deviation
	Planck Length	lP	1.61626e-35	1.61626e-35	1	10000
	Planck mass	{ ℏ }{ lP c }	2.17643e-08	2.17643e-08	1	9827
	Planck time	{ lP }{ c }	5.39125e-44	5.39125e-44	1	10117
	G	{ lP3 }{ mP tP2 }	6.6743e-11	6.6743e-11	1
	hbar	{ lP2 mP }{ tP }	1.05457e-34	1.05457e-34	1
	c	{ lP }{ tP }	299792458	299792458	1
	Indexed by mass	Formula	Value	CODATA value	Deviation
	Planck Length	{ ℏ }{ mP c }	1.61626e-35	1.61626e-35	1	9827
	Planck mass	mP	2.17643e-08	2.17643e-08	1	10000
	Planck time	{ lP }{ c }	5.39125e-44	5.39125e-44	1	9945
	G	{ lP3 }{ mP tP2 }	6.6743e-11	6.6743e-11	1
	hbar	{ lP2 mP }{ tP }	1.05457e-34	1.05457e-34	1
	c	{ lP }{ tP }	299792458	299792458	1
	Indexed by time	Formula	Value	CODATA value	Deviation
	Planck Length	tP c	1.61626e-35	1.61626e-35	1	9883
	Planck mass	{ ℏ }{ lP c }	2.17643e-08	2.17643e-08	1	9945
	Planck time	tP	5.39125e-44	5.39125e-44	1	10000
	G	{ lP3 }{ mP tP2 }	6.6743e-11	6.6743e-11	1
	hbar	{ lP2 mP }{ tP }	1.05457e-34	1.05457e-34	1
	c	{ lP }{ tP }	299792458	299792458	1
																	2 lp / lambda			#DIV/0!
																	lp / T	Uber operator in m/s
																	.5 lp Lam C / Lam^2	Uber operator dimensionless		#REF!
																	Total Energy reductions
																	Ep (a) + Ep (b)

## Sheet: Mechanics
			Potential	lP	mP	tP	pP	tP	EP	EP	lP / tP	lP / tP	lP mP	pP tP	lP pP	EP tP	FP	FP	EP	Traditional equations
				1.61626e-35	2.17643e-08	5.39125e-44	6.52479	5.39125e-44	1.95608e+09	1.95608e+09	299792458	299792458	3.51767e-43	3.51767e-43	1.05457e-34	1.05457e-34	1.21026e+44	1.21026e+44	1.95608e+09
				meters	kilograms	seconds	kgm/s	seconds	kgm2/s2	kgm2/s2	m/s	m/s	kgm	kgm	kgm2/s	kgm2/s	kgm/s2	kgm/s3	kgm2/s2
		Reductions
	PHYSICAL FORM			ƛ	m	Tλ	p	T	Ek	Total energy	v (momentum)	velocity	Q constant	Q constant	Action	Action	Force	Force	Kinetic Energy	ƛ	p	KE	Total Energy
	γ
													ƛm	pTλ	ƛp	TE
		βλ
		1.45538e-19		1.11054e-16	3.16754e-27	3.70436e-25	9.49604e-19	3.70436e-25	2.84684e-10	2.84684e-10	2.99792e+08	2.99792e+08	3.51767e-43	3.51767e-43	1.05457e-34	1.05457e-34	2.56348e+06	2.56348e+06	2.84684e-10	1.11054e-16	9.49604e-19	2.84684e-10	2.84684e-10
		8.65421e-21		1.86759e-15	1.88353e-28	6.22962e-24	5.64668e-20	6.22962e-24	1.69283e-11	1.69283e-11	2.99792e+08	2.99792e+08	3.51767e-43	3.51767e-43	1.05457e-34	1.05457e-34	9064.24	9064.24	1.69283e-11	1.86759e-15	5.64669e-20	1.69283e-11	1.69283e-11
		4.18546e-23		3.86159e-13	9.10938e-31	1.28809e-21	2.73092e-22	1.28809e-21	8.1871e-14	8.1871e-14	2.99792e+08	2.99792e+08	3.51767e-43	3.51767e-43	1.05457e-34	1.05457e-34	0.212014	0.212014	8.1871e-14	3.86159e-13	2.73092e-22	8.18711e-14	8.1871e-14
		8.35361e-28		1.9348e-08	1.81811e-35	6.4538e-17	5.45055e-27	6.4538e-17	1.63403e-18	1.63403e-18	2.99792e+08	2.99792e+08	3.51767e-43	3.51767e-43	1.05457e-34	1.05457e-34	8.44549e-11	8.44549e-11	1.63403e-18	1.9348e-08	5.45055e-27	1.63403e-18	1.63403e-18
		4.95597e-34		0.0326123	1.07864e-41	1.08783e-10	3.23367e-33	1.08783e-10	9.69429e-25	9.69429e-25	2.99792e+08	2.99792e+08	3.51767e-43	3.51767e-43	1.05457e-34	1.05457e-34	2.97259e-23	2.97259e-23	9.69429e-25	0.0326123	3.23367e-33	9.69429e-25	9.69429e-25
	e-																			ƛ	p	KE	Total Energy
													ƛm	pTλ	ƛp	TE					m0v	1/2 m0v2
	compton potential	βm	4.18546e-23	ƛC	m0	Tλ, C	pC	TC	Ek	Total energy	v (momentum)	velocity	Q constant	Q constant	Action	Action	Force	Force	Kinetic Energy	ƛ	p	E	Total Energy
			1	3.86159e-13	9.10938e-31	1.28809e-21	2.73092e-22	1.28809e-21	4.09355e-14	1.15783e-13	2.99792e+08	2.99792e+08	3.51767e-43	3.51767e-43	1.05457e-34	1.05457e-34	0.212014	0.212014	4.09355e-14	3.86159e-13	2.73092e-22	4.09355e-14	1.15783e-13
			v/c	ƛ	m	Tλ	p	T	Ek	Total energy	v (momentum)	velocity	Q constant	Q constant	Action	Action	Force	Force	Kinetic Energy	ƛ	p	E	Total Energy
			0.999999	3.8616e-13	9.10937e-31	1.28809e-21	2.73092e-22	1.28809e-21	4.09354e-14	1.15783e-13	2.99792e+08	2.99792e+08	3.51767e-43	3.51767e-43	1.05457e-34	1.05457e-34	0.212013	0.212013	4.09354e-14	3.8616e-13	2.73092e-22	4.09354e-14	1.15783e-13
			0.999	3.86546e-13	9.10027e-31	1.28938e-21	2.72819e-22	1.29067e-21	4.08537e-14	1.15725e-13	2.99493e+08	2.99493e+08	3.51767e-43	3.51767e-43	1.05457e-34	1.05457e-34	0.211378	0.211378	4.08537e-14	3.86546e-13	2.72819e-22	4.08537e-14	1.15725e-13
			0.9	4.29066e-13	8.19844e-31	1.43121e-21	2.45783e-22	1.59023e-21	3.31578e-14	1.10146e-13	2.69813e+08	2.69813e+08	3.51767e-43	3.51767e-43	1.05457e-34	1.05457e-34	0.154558	0.154558	3.31578e-14	4.29066e-13	2.45783e-22	3.31578e-14	1.10146e-13
			0.5	7.72319e-13	4.55469e-31	2.57618e-21	1.36546e-22	5.15236e-21	1.02339e-14	9.15346e-14	1.49896e+08	1.49896e+08	3.51767e-43	3.51767e-43	1.05457e-34	1.05457e-34	0.0265017	0.0265017	1.02339e-14	7.72319e-13	1.36546e-22	1.02339e-14	9.15346e-14
			0.3	1.2872e-12	2.73281e-31	4.29363e-21	8.19277e-23	1.43121e-20	3.6842e-15	8.54759e-14	8.99377e+07	8.99377e+07	3.51767e-43	3.51767e-43	1.05457e-34	1.05457e-34	0.00572437	0.00572437	3.6842e-15	1.2872e-12	8.19277e-23	3.6842e-15	8.54759e-14
	ground state H1		0.00729735	5.29177e-11	6.64744e-33	1.76515e-19	1.99285e-24	2.41888e-17	2.17987e-18	8.18732e-14	2.18769e+06	2.18769e+06	3.51767e-43	3.51767e-43	1.05457e-34	1.05457e-34	8.23872e-08	8.23872e-08	2.17987e-18	5.29177e-11	1.99285e-24	2.17987e-18	8.18732e-14
			1e-06	3.86159e-07	9.10938e-37	1.28809e-15	2.73092e-28	1.28809e-09	4.09355e-26	8.1871e-14	299.792	299.792	3.51767e-43	3.51767e-43	1.05457e-34	1.05457e-34	2.12014e-19	2.12014e-19	4.09355e-26	3.86159e-07	2.73092e-28	4.09355e-26	8.1871e-14
			1e-10	0.00386159	9.10938e-41	1.28809e-11	2.73092e-32	0.128809	4.09355e-34	8.1871e-14	0.0299792	0.0299792	3.51767e-43	3.51767e-43	1.05457e-34	1.05457e-34	2.12014e-31	2.12014e-31	4.09355e-34	0.00386159	2.73092e-32	4.09355e-34	8.1871e-14
	OPERATOR FORM			ƛ	m	Tλ	p	T	Ek	Total Energy
	γ
					βλ mP		βλ pP		βλ EP	βλ EP
		βλ
		1.45538e-19		1.11054e-16	3.16754e-27	3.70436e-25	9.49604e-19	3.70436e-25	2.84684e-10	2.84684e-10
		8.65421e-21		1.86759e-15	1.88353e-28	6.22962e-24	5.64669e-20	6.22962e-24	1.69283e-11	1.69283e-11
		4.18546e-23		3.86159e-13	9.10938e-31	1.28809e-21	2.73092e-22	1.28809e-21	8.1871e-14	8.1871e-14
		8.35361e-28		1.9348e-08	1.81811e-35	6.4538e-17	5.45055e-27	6.4538e-17	1.63403e-18	1.63403e-18
		4.95597e-34		0.0326123	1.07864e-41	1.08783e-10	3.23367e-33	1.08783e-10	9.69429e-25	9.69429e-25
	e-			* βλ = βm βp
					βλ mP		βλ pP		βλ βs βv EP	βλ βE EP			βE
	Compton Potential	βm	4.18546e-23	ƛC	m0	Tλ, C	pC	TC	Ek	Total Energy			βE
			1	3.86159e-13	9.10938e-31	1.28809e-21	2.73092e-22	1.28809e-21	4.09355e-14	1.15783e-13			1.41421
		βp	βv	ƛ	m	Tλ	p	T	Ek	Total Energy			βE
		0.999999	0.999999	3.8616e-13	9.10937e-31	1.28809e-21	2.73092e-22	1.28809e-21	4.09354e-14	1.15783e-13			1.41421
		0.999	0.999	3.86546e-13	9.10027e-31	1.28938e-21	2.72819e-22	1.29067e-21	4.08537e-14	1.15725e-13			1.41492
		0.9	0.9	4.29066e-13	8.19844e-31	1.43121e-21	2.45783e-22	1.59023e-21	3.31578e-14	1.10146e-13			1.49485
		0.5	0.5	7.72319e-13	4.55469e-31	2.57618e-21	1.36546e-22	5.15236e-21	1.02339e-14	9.15346e-14			2.23607
		0.3	0.3	1.2872e-12	2.73281e-31	4.29363e-21	8.19277e-23	1.43121e-20	3.6842e-15	8.54759e-14			3.4801
	ground state H1	0.00729735	0.00729735	5.29177e-11	6.64744e-33	1.76515e-19	1.99285e-24	2.41888e-17	2.17987e-18	8.18732e-14			137.04
		1e-06	1e-06	3.86159e-07	9.10938e-37	1.28809e-15	2.73092e-28	1.28809e-09	4.09355e-26	8.1871e-14			1e+06
		1e-10	1e-10	0.00386159	9.10938e-41	1.28809e-11	2.73092e-32	0.128809	4.09355e-34	8.1871e-14			1e+10

## Sheet: Gravity
		Potential	mP	lP	lP / mP	lP / mP	lP	mP	lP	lP / tP	EP	aP	FP	Traditional Formulas
			2.17643e-08	1.61626e-35	7.42616e-28	7.42616e-28	1.61626e-35	2.17643e-08	1.61626e-35	299792458	1.95608e+09	5.56073e+51	1.21026e+44
			kilograms	meters	m/kg	m/kg	meters	kilograms	meters	m/s	joules	m/s2	Newtons
	PHYSICAL FORM	Massive Body	Mass	Radius	Linear density				Schwarzschild radius	Escape velocity	Energy potential	Acceleration potential	Force potential	Schwarzschild radius	Escape velocity	Energy potential	Acceleration potential	Force potential
	formula		M	r
		Gravitational Body (M)
		Earth	5.9723e+24	6378137	5.33977e-19	-̶̶̶	-̶̶̶	-̶̶̶	0.00887025	-11180	-5.69302e-23	-9.7985	-8.92583e-30	0.00887025	-11180	-5.69302e-23	-9.7985	-8.92583e-30
		Sun	1.98847e+30	695700000	1.74933e-22	-̶̶̶	-̶̶̶	-̶̶̶	2953.34	-617684	-1.73777e-19	-274.208	-2.49787e-28	2953.34	-617684	-1.73777e-19	-274.208	-2.49787e-28
		Black Hole Earth	5.9723e+24	0.00887025	7.42616e-28	-̶̶̶	-̶̶̶	-̶̶̶	0.00887025	-299792458	-4.09355e-14	-5.06612e+18	-4.61492e-12	0.00887025	-2.99792e+08	-4.09355e-14	-5.06612e+18	-4.61492e-12
		Black Hole Sun	1.98847e+30	2953.34	7.42616e-28	-̶̶̶	-̶̶̶	-̶̶̶	2953.34	-299792458	-4.09355e-14	-1.52159e+13	-1.38608e-17	2953.34	-2.99792e+08	-4.09355e-14	-1.52159e+13	-1.38608e-17
		Sagittarius A*	8.25815e+36	1.22653e+10	7.42616e-28	-̶̶̶	-̶̶̶	-̶̶̶	1.22653e+10	-299792458	-4.09355e-14	-3.66382e+06	-3.33751e-24	1.22653e+10	-2.99792e+08	-4.09355e-14	-3.66382e+06	-3.33751e-24
		Planck Mass Black Hole	2.17643e-08	3.23251e-35	7.42616e-28	-̶̶̶	-̶̶̶	-̶̶̶	3.23251e-35	-299792458	-4.09355e-14	-1.39018e+51	-1.26637e+21	3.23251e-35	-2.99792e+08	-4.09355e-14	-1.39018e+51	-1.26637e+21
		Second Body (m)
		electron	9.10938e-31	-̶̶̶	-̶̶̶
	OPERATOR FORM	Massive Body	Mass	Radius	Mass Density	βρ	βr	βm		Escape velocity	Energy potential	Acceleration potential	Force potential
	formula		M	r							EP βρ βm	aP βρ βr	EP βρ βr βm
		Gravitational Body (M)
		Earth	5.9723e+24	6378137	5.33977e-19	6.95364e-10	2.53406e-42	-̶̶̶	-̶̶̶	-11180	-5.69302e-23	-9.7985	-8.92583e-30
		Sun	1.98847e+30	695700000	1.74933e-22	2.12257e-06	2.32321e-44	-̶̶̶	-̶̶̶	-617684	-1.73777e-19	-274.208	-2.49787e-28
		Black Hole Earth	5.9723e+24	0.00887025	7.42616e-28	0.5	1.82211e-33	-̶̶̶	-̶̶̶	-299792458	-4.09355e-14	-5.06612e+18	-4.61492e-12
		Black Hole Sun	1.98847e+30	2953.34	7.42616e-28	0.5	5.47263e-39	-̶̶̶	-̶̶̶	-299792458	-4.09355e-14	-1.52159e+13	-1.38608e-17
		Sagittarius A*	8.25815e+36	1.22653e+10	7.42616e-28	0.5	1.31775e-45	-̶̶̶	-̶̶̶	-299792458	-4.09355e-14	-3.66382e+06	-3.33751e-24
		Planck Mass Black Hole	2.17643e-08	3.23251e-35	7.42616e-28	0.5	0.5	-̶̶̶	-̶̶̶	-299792458	-4.09355e-14	-1.39018e+51	-1.26637e+21
		Second Body (m)
		electron	9.10938e-31	-̶̶̶	-̶̶̶			4.18546e-23

## Sheet: Atomic spectra
				lP	1.61626e-35			Potential	EP					lP	mP	tP	pP	tP	lP / tP	EP	EP			lP	mP	tP	pP	tP	lP / tP	EP	EP
				mP	2.17643e-08
				tP	5.39125e-44				1.95608e+09		βm	4.18546e-23		1.61626e-35	2.17643e-08	5.39125e-44	6.52478	5.39125e-44	2.99792e+08	1.95608e+09	1.22089e+28			1.61626e-35	2.17643e-08	5.39125e-44	6.52478	5.39125e-44	2.99792e+08	1.95608e+09	1.22089e+28	mass pro/elec	1836.15
																																reduced mass	0.999456
												initial										final
Transition	ni	nk	γ	Ei	Ek	Δ E	ƛ	E	E		e-	βp , βv	ri	ƛi	m	Tλ	p	T	v	KEi	KEi	βp , βv	rk	ƛk	m	Tλ	p	T	v	KEK	KEK	Δ KE	Δ KE	variance		F electrostatic, i	F electrostatic, k	Δ F	UE , i	UE, k	Δ UE	Δ UE	electrostatic mechanical
				source	source	Ek - Ei							a0 ni2		mP βm βλ		pP βm βλ			EP s βm βλ βv	EP s βm βλ βv		a0 nk2		mP βm βλ		pP βm βλ			EP s βm βλ βv	EP s βm βλ βv	KEk - KEi	KEk - KEi					Fk - Fi			UE, k - UE , i	UE, k - UE , i
				cm-1	cm-1	cm-1	m	joules	eV				m	m	kg	s	kg m / s	s	m/s	joules	eV		m	m	kg	s	kg m / s	s	m/s	Joules	eV	Joules	eV	%		Newtons	Newtons	Newtons	Joules	Joules	Joules	eV
Wiese and Fuhr: Accurate Atomic Transition Probabilities for Hydrogen, Helium, and Lithium
https://aip.scitation.org/doi/abs/10.1063/1.3077727											Compton potential	1	-	3.86159e-13	9.10938e-31	1.28809e-21	2.73092e-22	1.28809e-21	2.99792e+08	4.09355e-14	255499	1	-	3.86159e-13	9.10938e-31	1.28809e-21	2.73092e-22	1.28809e-21	2.99792e+08	4.09355e-14	255499
H I: Allowed transitions, average values
												α	a0
											Bohr radius	0.00729735	5.29177e-11
1–2 (Lα)	1	2		0	82259.2	82259.2	1.9348e-08	1.63403e-18	10.1988			0.00729735	5.29177e-11	5.29177e-11	6.64744e-33	1.76515e-19	1.99285e-24	2.41888e-17	2.18769e+06	2.17987e-18	13.6057	0.00364868	2.11671e-10	1.05835e-10	3.32372e-33	3.53029e-19	9.96426e-25	9.67554e-17	1.09385e+06	5.44968e-19	3.40142	-1.6349e-18	-10.1987	0.999988		8.23872e-08	5.1492e-09	-7.7196e-08	2.17987e-18	5.44968e-19	-1.63401e-18	-10.1987	1
1–3 (Lß)	1	3		0	97492.3	97492.3	1.63249e-08	1.93663e-18	12.0875			0.00729735	5.29177e-11	5.29177e-11	6.64744e-33	1.76515e-19	1.99285e-24	2.41888e-17	2.18769e+06	2.17987e-18	13.6057	0.00243245	4.76259e-10	1.58753e-10	2.21581e-33	5.29544e-19	#REF!	2.177e-16	729230	2.42208e-19	1.51174	-1.93766e-18	-12.0874	0.999989		8.23872e-08	1.01713e-09	-8.13258e-08	2.17987e-18	2.42208e-19	-1.93661e-18	-12.0874	1
1–4 (Lγ)	1	4		0	102824	102824	1.54784e-08	2.04254e-18	12.7485			0.00729735	5.29177e-11	5.29177e-11	6.64744e-33	1.76515e-19	1.99285e-24	2.41888e-17	2.18769e+06	2.17987e-18	13.6057	0.00182434	8.46684e-10	2.11671e-10	1.66186e-33	7.06058e-19	#REF!	3.87022e-16	546923	1.36242e-19	0.850355	-2.04363e-18	-12.7484	0.999989		8.23872e-08	3.21825e-10	-8.20207e-08	2.17987e-18	1.36242e-19	-2.04252e-18	-12.7484	1
1–5 (Lδ)	1	5		0	105292	105292	1.51156e-08	2.09156e-18	13.0545			0.00729735	5.29177e-11	5.29177e-11	6.64744e-33	1.76515e-19	1.99285e-24	2.41888e-17	2.18769e+06	2.17987e-18	13.6057	0.00145947	1.32294e-09	2.64589e-10	1.32949e-33	8.82573e-19	#REF!	6.04721e-16	437538	8.71949e-20	0.544228	-2.09268e-18	-13.0544	0.999989		8.23872e-08	1.3182e-10	-8.22107e-08	2.17987e-18	8.71949e-20	-2.09154e-18	-13.0544	1
1–6 (Lε)	1	6		0	106632	106632	1.49256e-08	2.11819e-18	13.2207			0.00729735	5.29177e-11	5.29177e-11	6.64744e-33	1.76515e-19	1.99285e-24	2.41888e-17	2.18769e+06	2.17987e-18	13.6057	0.00121623	1.90504e-09	3.17506e-10	1.10791e-33	1.05909e-18	#REF!	8.70798e-16	364615	6.0552e-20	0.377936	-2.11932e-18	-13.2206	0.999989		8.23872e-08	6.35704e-11	-8.22789e-08	2.17987e-18	6.0552e-20	-2.11817e-18	-13.2206	1
1–7	1	7		0	107440	107440	1.48133e-08	2.13425e-18	13.3209			0.00729735	5.29177e-11	5.29177e-11	6.64744e-33	1.76515e-19	1.99285e-24	2.41888e-17	2.18769e+06	2.17987e-18	13.6057	0.00104248	2.59297e-09	3.70424e-10	9.49634e-34	1.2356e-18	#REF!	1.18525e-15	312527	4.44872e-20	0.277667	-2.13538e-18	-13.3208	0.999989		8.23872e-08	3.43137e-11	-8.23081e-08	2.17987e-18	4.44872e-20	-2.13422e-18	-13.3208	1
1–8	1	8		0	107965	107965	1.47413e-08	2.14467e-18	13.386			0.00729735	5.29177e-11	5.29177e-11	6.64744e-33	1.76515e-19	1.99285e-24	2.41888e-17	2.18769e+06	2.17987e-18	13.6057	0.000912169	3.38673e-09	4.23342e-10	8.3093e-34	1.41212e-18	#REF!	1.54809e-15	273461	3.40605e-20	0.212589	-2.14581e-18	-13.3858	0.999987		8.23872e-08	2.01141e-11	-8.23223e-08	2.17987e-18	3.40605e-20	-2.14464e-18	-13.3858	1
1–9	1	9		0	108325	108325	1.46924e-08	2.15182e-18	13.4306			0.00729735	5.29177e-11	5.29177e-11	6.64744e-33	1.76515e-19	1.99285e-24	2.41888e-17	2.18769e+06	2.17987e-18	13.6057	0.000810817	4.28634e-09	4.76259e-10	7.38604e-34	1.58863e-18	#REF!	1.9593e-15	243077	2.6912e-20	0.167971	-2.15296e-18	-13.4304	0.999987		8.23872e-08	1.25571e-11	-8.23298e-08	2.17987e-18	2.6912e-20	-2.15179e-18	-13.4304	1
1–10	1	10		0	108582	108582	1.46575e-08	2.15693e-18	13.4625			0.00729735	5.29177e-11	5.29177e-11	6.64744e-33	1.76515e-19	1.99285e-24	2.41888e-17	2.18769e+06	2.17987e-18	13.6057	0.000729735	5.29177e-09	5.29177e-10	6.64744e-34	1.76515e-18	#REF!	2.41888e-15	218769	2.17987e-20	0.136057	-2.15807e-18	-13.4623	0.999987		8.23872e-08	8.23872e-12	-8.23342e-08	2.17987e-18	2.17987e-20	-2.1569e-18	-13.4623	1
1–11	1	11		0	108773	108773	1.46319e-08	2.16071e-18	13.4861			0.00729735	5.29177e-11	5.29177e-11	6.64744e-33	1.76515e-19	1.99285e-24	2.41888e-17	2.18769e+06	2.17987e-18	13.6057	0.000663396	6.40304e-09	5.82095e-10	6.04313e-34	1.94166e-18	#REF!	2.92685e-15	198881	1.80155e-20	0.112444	-2.16186e-18	-13.4859	0.999987		8.23872e-08	5.62716e-12	-8.23368e-08	2.17987e-18	1.80155e-20	-2.16068e-18	-13.4859	1
1–12	1	12		0	108917	108917	1.46124e-08	2.16358e-18	13.504			0.00729735	5.29177e-11	5.29177e-11	6.64744e-33	1.76515e-19	1.99285e-24	2.41888e-17	2.18769e+06	2.17987e-18	13.6057	0.000608113	7.62015e-09	6.35013e-10	5.53953e-34	2.11817e-18	#REF!	3.48319e-15	182308	1.5138e-20	0.0944839	-2.16473e-18	-13.5038	0.999987		8.23872e-08	3.97315e-12	-8.23384e-08	2.17987e-18	1.5138e-20	-2.16356e-18	-13.5039	1
1–13	1	13		0	109030	109030	1.45973e-08	2.16582e-18	13.518			0.00729735	5.29177e-11	5.29177e-11	6.64744e-33	1.76515e-19	1.99285e-24	2.41888e-17	2.18769e+06	2.17987e-18	13.6057	0.000561335	8.94309e-09	6.8793e-10	5.11341e-34	2.29469e-18	#REF!	4.08791e-15	168284	1.28986e-20	0.080507	-2.16697e-18	-13.5178	0.999987		8.23872e-08	2.88461e-12	-8.23395e-08	2.17987e-18	1.28987e-20	-2.16579e-18	-13.5178	1
1–14	1	14		0	109119	109119	1.45854e-08	2.1676e-18	13.5291			0.00729735	5.29177e-11	5.29177e-11	6.64744e-33	1.76515e-19	1.99285e-24	2.41888e-17	2.18769e+06	2.17987e-18	13.6057	0.000521239	1.03719e-08	7.40848e-10	4.74817e-34	2.4712e-18	#REF!	4.74101e-15	156264	1.11218e-20	0.0694168	-2.16875e-18	-13.5289	0.999987		8.23872e-08	2.14461e-12	-8.23403e-08	2.17987e-18	1.11218e-20	-2.16757e-18	-13.5289	1
1–15	1	15		0	109192	109192	1.45758e-08	2.16903e-18	13.538			0.00729735	5.29177e-11	5.29177e-11	6.64744e-33	1.76515e-19	1.99285e-24	2.41888e-17	2.18769e+06	2.17987e-18	13.6057	0.00048649	1.19065e-08	7.93766e-10	4.43163e-34	2.64772e-18	#REF!	5.44249e-15	145846	9.68832e-21	0.0604697	-2.17018e-18	-13.5378	0.999987		8.23872e-08	1.6274e-12	-8.23408e-08	2.17987e-18	9.68832e-21	-2.169e-18	-13.5379	1
1–16	1	16		0	109251	109251	1.45679e-08	2.1702e-18	13.5453			0.00729735	5.29177e-11	5.29177e-11	6.64744e-33	1.76515e-19	1.99285e-24	2.41888e-17	2.18769e+06	2.17987e-18	13.6057	0.000456085	1.35469e-08	8.46684e-10	4.15465e-34	2.82423e-18	#REF!	6.19234e-15	136731	8.51512e-21	0.0531472	-2.17136e-18	-13.5452	0.999987		8.23872e-08	1.25713e-12	-8.23411e-08	2.17987e-18	8.51513e-21	-2.17018e-18	-13.5452	1
1–17	1	17		0	109300	109300	1.45614e-08	2.17118e-18	13.5514			0.00729735	5.29177e-11	5.29177e-11	6.64744e-33	1.76515e-19	1.99285e-24	2.41888e-17	2.18769e+06	2.17987e-18	13.6057	0.000429256	1.52932e-08	8.99601e-10	3.91026e-34	3.00075e-18	#REF!	6.99058e-15	128688	7.54281e-21	0.0470785	-2.17233e-18	-13.5512	0.999987		8.23872e-08	9.86426e-13	-8.23414e-08	2.17987e-18	7.54281e-21	-2.17115e-18	-13.5512	1
1–18	1	18		0	109341	109341	1.45559e-08	2.17199e-18	13.5565			0.00729735	5.29177e-11	5.29177e-11	6.64744e-33	1.76515e-19	1.99285e-24	2.41888e-17	2.18769e+06	2.17987e-18	13.6057	0.000405408	1.71453e-08	9.52519e-10	3.69302e-34	3.17726e-18	#REF!	7.83719e-15	121538	6.728e-21	0.0419929	-2.17314e-18	-13.5563	0.999987		8.23872e-08	7.8482e-13	-8.23416e-08	2.17987e-18	6.728e-21	-2.17196e-18	-13.5563	1
1–19	1	19		0	109375	109375	1.45513e-08	2.17268e-18	13.5608			0.00729735	5.29177e-11	5.29177e-11	6.64744e-33	1.76515e-19	1.99285e-24	2.41888e-17	2.18769e+06	2.17987e-18	13.6057	0.000384071	1.91033e-08	1.00544e-09	3.49865e-34	3.35378e-18	#REF!	8.73217e-15	115142	6.03843e-21	0.0376889	-2.17383e-18	-13.5606	0.999987		8.23872e-08	6.32187e-13	-8.23418e-08	2.17987e-18	6.03843e-21	-2.17265e-18	-13.5606	1
1–20	1	20		0	109405	109405	1.45473e-08	2.17327e-18	13.5645			0.00729735	5.29177e-11	5.29177e-11	6.64744e-33	1.76515e-19	1.99285e-24	2.41888e-17	2.18769e+06	2.17987e-18	13.6057	0.000364868	2.11671e-08	1.05835e-09	3.32372e-34	3.53029e-18	#REF!	9.67554e-15	109385	5.44968e-21	0.0340142	-2.17442e-18	-13.5643	0.999987		8.23872e-08	5.1492e-13	-8.23419e-08	2.17987e-18	5.44968e-21	-2.17324e-18	-13.5643	1
1–21	1	21		0	109430	109430	1.4544e-08	2.17377e-18	13.5676			0.00729735	5.29177e-11	5.29177e-11	6.64744e-33	1.76515e-19	1.99285e-24	2.41888e-17	2.18769e+06	2.17987e-18	13.6057	0.000347493	2.33367e-08	1.11127e-09	3.16545e-34	3.70681e-18	#REF!	1.06673e-14	104176	4.94302e-21	0.0308519	-2.17493e-18	-13.5674	0.999987		8.23872e-08	4.23626e-13	-8.2342e-08	2.17987e-18	4.94302e-21	-2.17375e-18	-13.5675	1
1–22	1	22		0	109452	109452	1.4541e-08	2.17421e-18	13.5704			0.00729735	5.29177e-11	5.29177e-11	6.64744e-33	1.76515e-19	1.99285e-24	2.41888e-17	2.18769e+06	2.17987e-18	13.6057	0.000331698	2.56122e-08	1.16419e-09	3.02156e-34	3.88332e-18	#REF!	1.17074e-14	99440.5	4.50387e-21	0.0281109	-2.17537e-18	-13.5702	0.999987		8.23872e-08	3.51697e-13	-8.2342e-08	2.17987e-18	4.50387e-21	-2.17418e-18	-13.5702	1
1–23	1	23		0	109472	109472	1.45385e-08	2.1746e-18	13.5728			0.00729735	5.29177e-11	5.29177e-11	6.64744e-33	1.76515e-19	1.99285e-24	2.41888e-17	2.18769e+06	2.17987e-18	13.6057	0.000317276	2.79935e-08	1.21711e-09	2.89019e-34	4.05983e-18	#REF!	1.27959e-14	95117	4.12074e-21	0.0257196	-2.17575e-18	-13.5726	0.999987		8.23872e-08	2.94407e-13	-8.23421e-08	2.17987e-18	4.12074e-21	-2.17457e-18	-13.5726	1
1–24	1	24		0	109489	109489	1.45362e-08	2.17493e-18	13.5749			0.00729735	5.29177e-11	5.29177e-11	6.64744e-33	1.76515e-19	1.99285e-24	2.41888e-17	2.18769e+06	2.17987e-18	13.6057	0.000304056	3.04806e-08	1.27003e-09	2.76977e-34	4.23635e-18	#REF!	1.39328e-14	91153.8	3.7845e-21	0.023621	-2.17609e-18	-13.5747	0.999987		8.23872e-08	2.48322e-13	-8.23422e-08	2.17987e-18	3.7845e-21	-2.1749e-18	-13.5747	1
1–25	1	25		0	109504	109504	1.45342e-08	2.17523e-18	13.5767			0.00729735	5.29177e-11	5.29177e-11	6.64744e-33	1.76515e-19	1.99285e-24	2.41888e-17	2.18769e+06	2.17987e-18	13.6057	0.000291894	3.30736e-08	1.32294e-09	2.65898e-34	4.41286e-18	#REF!	1.5118e-14	87507.6	3.48779e-21	0.0217691	-2.17638e-18	-13.5765	0.999987		8.23872e-08	2.10911e-13	-8.23422e-08	2.17987e-18	3.4878e-21	-2.1752e-18	-13.5765	1
1–26	1	26		0	109517	109517	1.45325e-08	2.17549e-18	13.5783			0.00729735	5.29177e-11	5.29177e-11	6.64744e-33	1.76515e-19	1.99285e-24	2.41888e-17	2.18769e+06	2.17987e-18	13.6057	0.000280667	3.57724e-08	1.37586e-09	2.55671e-34	4.58938e-18	#REF!	1.63517e-14	84142	3.22466e-21	0.0201268	-2.17665e-18	-13.5782	0.999987		8.23872e-08	1.80288e-13	-8.23422e-08	2.17987e-18	3.22466e-21	-2.17546e-18	-13.5782	1
1–27	1	27		0	109529	109529	1.45309e-08	2.17573e-18	13.5798			0.00729735	5.29177e-11	5.29177e-11	6.64744e-33	1.76515e-19	1.99285e-24	2.41888e-17	2.18769e+06	2.17987e-18	13.6057	0.000270272	3.8577e-08	1.42878e-09	2.46201e-34	4.76589e-18	#REF!	1.76337e-14	81025.6	2.99022e-21	0.0186635	-2.17688e-18	-13.5796	0.999987		8.23872e-08	1.55026e-13	-8.23422e-08	2.17987e-18	2.99022e-21	-2.1757e-18	-13.5796	1
1–28	1	28		0	109539	109539	1.45295e-08	2.17593e-18	13.5811			0.00729735	5.29177e-11	5.29177e-11	6.64744e-33	1.76515e-19	1.99285e-24	2.41888e-17	2.18769e+06	2.17987e-18	13.6057	0.00026062	4.14875e-08	1.4817e-09	2.37409e-34	4.94241e-18	#REF!	1.89641e-14	78131.8	2.78045e-21	0.0173542	-2.17709e-18	-13.5809	0.999987		8.23872e-08	1.34038e-13	-8.23423e-08	2.17987e-18	2.78045e-21	-2.17591e-18	-13.5809	1
1–29	1	29		0	109549	109549	1.45282e-08	2.17612e-18	13.5823			0.00729735	5.29177e-11	5.29177e-11	6.64744e-33	1.76515e-19	1.99285e-24	2.41888e-17	2.18769e+06	2.17987e-18	13.6057	0.000251633	4.45038e-08	1.53461e-09	2.29222e-34	5.11892e-18	#REF!	2.03428e-14	75437.6	2.592e-21	0.016178	-2.17728e-18	-13.5821	0.999987		8.23872e-08	1.16484e-13	-8.23423e-08	2.17987e-18	2.592e-21	-2.1761e-18	-13.5821	1
1–30	1	30		0	109557	109557	1.45271e-08	2.17629e-18	13.5834			0.00729735	5.29177e-11	5.29177e-11	6.64744e-33	1.76515e-19	1.99285e-24	2.41888e-17	2.18769e+06	2.17987e-18	13.6057	0.000243245	4.76259e-08	1.58753e-09	2.21581e-34	5.29544e-18	#REF!	2.177e-14	72923	2.42208e-21	0.0151174	-2.17745e-18	-13.5832	0.999987		8.23872e-08	1.01713e-13	-8.23423e-08	2.17987e-18	2.42208e-21	-2.17627e-18	-13.5832	1
1–31	1	31		0	109565	109565	1.45261e-08	2.17645e-18	13.5843			0.00729735	5.29177e-11	5.29177e-11	6.64744e-33	1.76515e-19	1.99285e-24	2.41888e-17	2.18769e+06	2.17987e-18	13.6057	0.000235398	5.08539e-08	1.64045e-09	2.14433e-34	5.47195e-18	#REF!	2.32455e-14	70570.7	2.26834e-21	0.0141578	-2.1776e-18	-13.5841	0.999987		8.23872e-08	8.92099e-14	-8.23423e-08	2.17987e-18	2.26834e-21	-2.17642e-18	-13.5841	1
1–32	1	32		0	109572	109572	1.45252e-08	2.17659e-18	13.5852			0.00729735	5.29177e-11	5.29177e-11	6.64744e-33	1.76515e-19	1.99285e-24	2.41888e-17	2.18769e+06	2.17987e-18	13.6057	0.000228042	5.41877e-08	1.69337e-09	2.07732e-34	5.64847e-18	#REF!	2.47694e-14	68365.3	2.12878e-21	0.0132868	-2.17774e-18	-13.585	0.999987		8.23872e-08	7.85706e-14	-8.23423e-08	2.17987e-18	2.12878e-21	-2.17656e-18	-13.585	1
1–33	1	33		0	109578	109578	1.45243e-08	2.17671e-18	13.586			0.00729735	5.29177e-11	5.29177e-11	6.64744e-33	1.76515e-19	1.99285e-24	2.41888e-17	2.18769e+06	2.17987e-18	13.6057	0.000221132	5.76274e-08	1.74628e-09	2.01438e-34	5.82498e-18	#REF!	2.63417e-14	66293.7	2.00172e-21	0.0124937	-2.17787e-18	-13.5858	0.999987		8.23872e-08	6.94711e-14	-8.23423e-08	2.17987e-18	2.00172e-21	-2.17669e-18	-13.5858	1
1–34	1	34		0	109584	109584	1.45235e-08	2.17683e-18	13.5867			0.00729735	5.29177e-11	5.29177e-11	6.64744e-33	1.76515e-19	1.99285e-24	2.41888e-17	2.18769e+06	2.17987e-18	13.6057	0.000214628	6.11729e-08	1.7992e-09	1.95513e-34	6.00149e-18	#REF!	2.79623e-14	64343.9	1.8857e-21	0.0117696	-2.17799e-18	-13.5865	0.999987		8.23872e-08	6.16516e-14	-8.23423e-08	2.17987e-18	1.8857e-21	-2.1768e-18	-13.5865	1
1–35	1	35		0	109590	109590	1.45228e-08	2.17694e-18	13.5874			0.00729735	5.29177e-11	5.29177e-11	6.64744e-33	1.76515e-19	1.99285e-24	2.41888e-17	2.18769e+06	2.17987e-18	13.6057	0.000208496	6.48242e-08	1.85212e-09	1.89927e-34	6.17801e-18	#REF!	2.96313e-14	62505.5	1.77949e-21	0.0111067	-2.17809e-18	-13.5872	0.999987		8.23872e-08	5.4902e-14	-8.23423e-08	2.17987e-18	1.77949e-21	-2.17691e-18	-13.5872	1
1–36	1	36		0	109594	109594	1.45222e-08	2.17703e-18	13.588			0.00729735	5.29177e-11	5.29177e-11	6.64744e-33	1.76515e-19	1.99285e-24	2.41888e-17	2.18769e+06	2.17987e-18	13.6057	0.000202704	6.85814e-08	1.90504e-09	1.84651e-34	6.35452e-18	#REF!	3.13487e-14	60769.2	1.682e-21	0.0104982	-2.17819e-18	-13.5878	0.999987		8.23872e-08	4.90512e-14	-8.23424e-08	2.17987e-18	1.682e-21	-2.177e-18	-13.5878	1
1–37	1	37		0	109599	109599	1.45216e-08	2.17712e-18	13.5885			0.00729735	5.29177e-11	5.29177e-11	6.64744e-33	1.76515e-19	1.99285e-24	2.41888e-17	2.18769e+06	2.17987e-18	13.6057	0.000197226	7.24444e-08	1.95796e-09	1.7966e-34	6.53104e-18	#REF!	3.31145e-14	59126.8	1.59231e-21	0.00993841	-2.17828e-18	-13.5883	0.999987		8.23872e-08	4.39595e-14	-8.23424e-08	2.17987e-18	1.59231e-21	-2.17709e-18	-13.5884	1
1–38	1	38		0	109603	109603	1.4521e-08	2.17721e-18	13.589			0.00729735	5.29177e-11	5.29177e-11	6.64744e-33	1.76515e-19	1.99285e-24	2.41888e-17	2.18769e+06	2.17987e-18	13.6057	0.000192036	7.64132e-08	2.01087e-09	1.74933e-34	6.70755e-18	#REF!	3.49287e-14	57570.8	1.50961e-21	0.00942222	-2.17836e-18	-13.5889	0.999987		8.23872e-08	3.95117e-14	-8.23424e-08	2.17987e-18	1.50961e-21	-2.17718e-18	-13.5889	1
1–39	1	39		0	109607	109607	1.45205e-08	2.17728e-18	13.5895			0.00729735	5.29177e-11	5.29177e-11	6.64744e-33	1.76515e-19	1.99285e-24	2.41888e-17	2.18769e+06	2.17987e-18	13.6057	0.000187112	8.04879e-08	2.06379e-09	1.70447e-34	6.88407e-18	#REF!	3.67912e-14	56094.6	1.43318e-21	0.00894523	-2.17844e-18	-13.5893	0.999987		8.23872e-08	3.56124e-14	-8.23424e-08	2.17987e-18	1.43318e-21	-2.17725e-18	-13.5893	1
1–40	1	40		0	109610	109610	1.452e-08	2.17735e-18	13.59			0.00729735	5.29177e-11	5.29177e-11	6.64744e-33	1.76515e-19	1.99285e-24	2.41888e-17	2.18769e+06	2.17987e-18	13.6057	0.000182434	8.46684e-08	2.11671e-09	1.66186e-34	7.06058e-18	#REF!	3.87022e-14	54692.3	1.36242e-21	0.00850355	-2.17851e-18	-13.5898	0.999987		8.23872e-08	3.21825e-14	-8.23424e-08	2.17987e-18	1.36242e-21	-2.17732e-18	-13.5898	1
2–3 (Hα)	2	3		82259.2	97492.3	15233.1	1.0448e-07	3.02598e-19	1.88867			0.00364868	2.11671e-10	1.05835e-10	3.32372e-33	3.53029e-19	9.96426e-25	9.67554e-17	1.09385e+06	5.44968e-19	3.40142	0.00243245	4.76259e-10	1.58753e-10	2.21581e-33	5.29544e-19	#REF!	2.177e-16	729230	2.42208e-19	1.51174	-3.0276e-19	-1.88865	0.999992		5.1492e-09	1.01713e-09	-4.12983e-09	5.44968e-19	2.42208e-19	-3.02595e-19	-1.88865	1
2–4 (Hß)	2	4		82259.2	102824	20564.7	7.73922e-08	4.08507e-19	2.5497			0.00364868	2.11671e-10	1.05835e-10	3.32372e-33	3.53029e-19	9.96426e-25	9.67554e-17	1.09385e+06	5.44968e-19	3.40142	0.00182434	8.46684e-10	2.11671e-10	1.66186e-33	7.06058e-19	#REF!	3.87022e-16	546923	1.36242e-19	0.850355	-4.08726e-19	-2.54968	0.999992		5.1492e-09	3.21825e-10	-4.82475e-09	5.44968e-19	1.36242e-19	-4.08504e-19	-2.54968	1
2–5 (Hγ)	2	5		82259.2	105292	23032.5	6.91002e-08	4.57528e-19	2.85566			0.00364868	2.11671e-10	1.05835e-10	3.32372e-33	3.53029e-19	9.96426e-25	9.67554e-17	1.09385e+06	5.44968e-19	3.40142	0.00145947	1.32294e-09	2.64589e-10	1.32949e-33	8.82573e-19	#REF!	6.04721e-16	437538	8.71949e-20	0.544228	-4.57773e-19	-2.85564	0.999992		5.1492e-09	1.3182e-10	-5.01465e-09	5.44968e-19	8.71949e-20	-4.57524e-19	-2.85564	1
2–6 (Hδ)	2	6		82259.2	106632	24373	6.52997e-08	4.84156e-19	3.02187			0.00364868	2.11671e-10	1.05835e-10	3.32372e-33	3.53029e-19	9.96426e-25	9.67554e-17	1.09385e+06	5.44968e-19	3.40142	0.00121623	1.90504e-09	3.17506e-10	1.10791e-33	1.05909e-18	#REF!	8.70798e-16	364615	6.0552e-20	0.377936	-4.84416e-19	-3.02184	0.999992		5.1492e-09	6.35704e-11	-5.08286e-09	5.44968e-19	6.0552e-20	-4.84152e-19	-3.02184	1
2–7 (Hε)	2	7		82259.2	107440	25181.3	6.32037e-08	5.00212e-19	3.12208			0.00364868	2.11671e-10	1.05835e-10	3.32372e-33	3.53029e-19	9.96426e-25	9.67554e-17	1.09385e+06	5.44968e-19	3.40142	0.00104248	2.59297e-09	3.70424e-10	9.49634e-34	1.2356e-18	#REF!	1.18525e-15	312527	4.44872e-20	0.277667	-5.00481e-19	-3.12205	0.999992		5.1492e-09	3.43137e-11	-5.1121e-09	5.44968e-19	4.44872e-20	-5.00209e-19	-3.12206	1
2–8	2	8		82259.2	107965	25706.2	6.19132e-08	5.10639e-19	3.18716			0.00364868	2.11671e-10	1.05835e-10	3.32372e-33	3.53029e-19	9.96426e-25	9.67554e-17	1.09385e+06	5.44968e-19	3.40142	0.000912169	3.38673e-09	4.23342e-10	8.3093e-34	1.41212e-18	#REF!	1.54809e-15	273461	3.40605e-20	0.212589	-5.10907e-19	-3.1871	0.999981		5.1492e-09	2.01141e-11	-5.1263e-09	5.44968e-19	3.40605e-20	-5.1063e-19	-3.1871	1
2–9	2	9		82259.2	108325	26065.8	6.10588e-08	5.17783e-19	3.23175			0.00364868	2.11671e-10	1.05835e-10	3.32372e-33	3.53029e-19	9.96426e-25	9.67554e-17	1.09385e+06	5.44968e-19	3.40142	0.000810817	4.28634e-09	4.76259e-10	7.38604e-34	1.58863e-18	#REF!	1.9593e-15	243077	2.6912e-20	0.167971	-5.18056e-19	-3.23169	0.999982		5.1492e-09	1.25571e-11	-5.13385e-09	5.44968e-19	2.6912e-20	-5.17774e-19	-3.23169	1
2–10	2	10		82259.2	108582	26323.1	6.04621e-08	5.22894e-19	3.26365			0.00364868	2.11671e-10	1.05835e-10	3.32372e-33	3.53029e-19	9.96426e-25	9.67554e-17	1.09385e+06	5.44968e-19	3.40142	0.000729735	5.29177e-09	5.29177e-10	6.64744e-34	1.76515e-18	#REF!	2.41888e-15	218769	2.17987e-20	0.136057	-5.23169e-19	-3.26359	0.999982		5.1492e-09	8.23872e-12	-5.13817e-09	5.44968e-19	2.17987e-20	-5.22885e-19	-3.26359	1
2–11	2	11		82259.2	108773	26513.5	6.0028e-08	5.26675e-19	3.28725			0.00364868	2.11671e-10	1.05835e-10	3.32372e-33	3.53029e-19	9.96426e-25	9.67554e-17	1.09385e+06	5.44968e-19	3.40142	0.000663396	6.40304e-09	5.82095e-10	6.04313e-34	1.94166e-18	#REF!	2.92685e-15	198881	1.80155e-20	0.112444	-5.26952e-19	-3.28719	0.999982		5.1492e-09	5.62716e-12	-5.14078e-09	5.44968e-19	1.80155e-20	-5.26666e-19	-3.28719	1
2–12	2	12		82259.2	108917	26658.2	5.9702e-08	5.29551e-19	3.3052			0.00364868	2.11671e-10	1.05835e-10	3.32372e-33	3.53029e-19	9.96426e-25	9.67554e-17	1.09385e+06	5.44968e-19	3.40142	0.000608113	7.62015e-09	6.35013e-10	5.53953e-34	2.11817e-18	#REF!	3.48319e-15	182308	1.5138e-20	0.0944839	-5.2983e-19	-3.30514	0.999982		5.1492e-09	3.97315e-12	-5.14243e-09	5.44968e-19	1.5138e-20	-5.29542e-19	-3.30514	1
2–13	2	13		82259.2	109030	26770.9	5.94507e-08	5.31789e-19	3.31917			0.00364868	2.11671e-10	1.05835e-10	3.32372e-33	3.53029e-19	9.96426e-25	9.67554e-17	1.09385e+06	5.44968e-19	3.40142	0.000561335	8.94309e-09	6.8793e-10	5.11341e-34	2.29469e-18	#REF!	4.08791e-15	168284	1.28986e-20	0.080507	-5.32069e-19	-3.31911	0.999982		5.1492e-09	2.88461e-12	-5.14352e-09	5.44968e-19	1.28987e-20	-5.3178e-19	-3.31911	1
2–14	2	14		82259.2	109119	26860.3	5.92529e-08	5.33565e-19	3.33025			0.00364868	2.11671e-10	1.05835e-10	3.32372e-33	3.53029e-19	9.96426e-25	9.67554e-17	1.09385e+06	5.44968e-19	3.40142	0.000521239	1.03719e-08	7.40848e-10	4.74817e-34	2.4712e-18	#REF!	4.74101e-15	156264	1.11218e-20	0.0694168	-5.33846e-19	-3.33019	0.999982		5.1492e-09	2.14461e-12	-5.14426e-09	5.44968e-19	1.11218e-20	-5.33556e-19	-3.33019	1
2–15	2	15		82259.2	109192	26932.4	5.90942e-08	5.34998e-19	3.33919			0.00364868	2.11671e-10	1.05835e-10	3.32372e-33	3.53029e-19	9.96426e-25	9.67554e-17	1.09385e+06	5.44968e-19	3.40142	0.00048649	1.19065e-08	7.93766e-10	4.43163e-34	2.64772e-18	#REF!	5.44249e-15	145846	9.68832e-21	0.0604697	-5.3528e-19	-3.33913	0.999982		5.1492e-09	1.6274e-12	-5.14477e-09	5.44968e-19	9.68832e-21	-5.34988e-19	-3.33914	1
2–16	2	16		82259.2	109251	26991.5	5.89649e-08	5.3617e-19	3.34651			0.00364868	2.11671e-10	1.05835e-10	3.32372e-33	3.53029e-19	9.96426e-25	9.67554e-17	1.09385e+06	5.44968e-19	3.40142	0.000456085	1.35469e-08	8.46684e-10	4.15465e-34	2.82423e-18	#REF!	6.19234e-15	136731	8.51512e-21	0.0531472	-5.36453e-19	-3.34645	0.999982		5.1492e-09	1.25713e-12	-5.14514e-09	5.44968e-19	8.51513e-21	-5.36161e-19	-3.34645	1
2–17	2	17		82259.2	109300	27040.4	5.88583e-08	5.37142e-19	3.35258			0.00364868	2.11671e-10	1.05835e-10	3.32372e-33	3.53029e-19	9.96426e-25	9.67554e-17	1.09385e+06	5.44968e-19	3.40142	0.000429256	1.52932e-08	8.99601e-10	3.91026e-34	3.00075e-18	#REF!	6.99058e-15	128688	7.54281e-21	0.0470785	-5.37425e-19	-3.35252	0.999982		5.1492e-09	9.86426e-13	-5.14541e-09	5.44968e-19	7.54281e-21	-5.37133e-19	-3.35252	1
2–18	2	18		82259.2	109341	27081.4	5.87692e-08	5.37957e-19	3.35766			0.00364868	2.11671e-10	1.05835e-10	3.32372e-33	3.53029e-19	9.96426e-25	9.67554e-17	1.09385e+06	5.44968e-19	3.40142	0.000405408	1.71453e-08	9.52519e-10	3.69302e-34	3.17726e-18	#REF!	7.83719e-15	121538	6.728e-21	0.0419929	-5.3824e-19	-3.3576	0.999982		5.1492e-09	7.8482e-13	-5.14562e-09	5.44968e-19	6.728e-21	-5.37947e-19	-3.3576	1
2–19	2	19		82259.2	109375	27116.1	5.8694e-08	5.38646e-19	3.36196			0.00364868	2.11671e-10	1.05835e-10	3.32372e-33	3.53029e-19	9.96426e-25	9.67554e-17	1.09385e+06	5.44968e-19	3.40142	0.000384071	1.91033e-08	1.00544e-09	3.49865e-34	3.35378e-18	#REF!	8.73217e-15	115142	6.03843e-21	0.0376889	-5.38929e-19	-3.3619	0.999982		5.1492e-09	6.32187e-13	-5.14577e-09	5.44968e-19	6.03843e-21	-5.38636e-19	-3.3619	1
2–20	2	20		82259.2	109405	27145.7	5.86299e-08	5.39234e-19	3.36563			0.00364868	2.11671e-10	1.05835e-10	3.32372e-33	3.53029e-19	9.96426e-25	9.67554e-17	1.09385e+06	5.44968e-19	3.40142	0.000364868	2.11671e-08	1.05835e-09	3.32372e-34	3.53029e-18	#REF!	9.67554e-15	109385	5.44968e-21	0.0340142	-5.39518e-19	-3.36557	0.999982		5.1492e-09	5.1492e-13	-5.14589e-09	5.44968e-19	5.44968e-21	-5.39225e-19	-3.36558	1
2–21	2	21		82259.2	109430	27171.2	5.85749e-08	5.39741e-19	3.3688			0.00364868	2.11671e-10	1.05835e-10	3.32372e-33	3.53029e-19	9.96426e-25	9.67554e-17	1.09385e+06	5.44968e-19	3.40142	0.000347493	2.33367e-08	1.11127e-09	3.16545e-34	3.70681e-18	#REF!	1.06673e-14	104176	4.94302e-21	0.0308519	-5.40025e-19	-3.36874	0.999982		5.1492e-09	4.23626e-13	-5.14598e-09	5.44968e-19	4.94302e-21	-5.39731e-19	-3.36874	1
2–22	2	22		82259.2	109452	27193.3	5.85273e-08	5.40179e-19	3.37153			0.00364868	2.11671e-10	1.05835e-10	3.32372e-33	3.53029e-19	9.96426e-25	9.67554e-17	1.09385e+06	5.44968e-19	3.40142	0.000331698	2.56122e-08	1.16419e-09	3.02156e-34	3.88332e-18	#REF!	1.17074e-14	99440.5	4.50387e-21	0.0281109	-5.40464e-19	-3.37147	0.999982		5.1492e-09	3.51697e-13	-5.14605e-09	5.44968e-19	4.50387e-21	-5.4017e-19	-3.37148	1
2–23	2	23		82259.2	109472	27212.6	5.84859e-08	5.40562e-19	3.37392			0.00364868	2.11671e-10	1.05835e-10	3.32372e-33	3.53029e-19	9.96426e-25	9.67554e-17	1.09385e+06	5.44968e-19	3.40142	0.000317276	2.79935e-08	1.21711e-09	2.89019e-34	4.05983e-18	#REF!	1.27959e-14	95117	4.12074e-21	0.0257196	-5.40847e-19	-3.37386	0.999982		5.1492e-09	2.94407e-13	-5.14611e-09	5.44968e-19	4.12074e-21	-5.40553e-19	-3.37387	1
2–24	2	24		82259.2	109489	27229.5	5.84495e-08	5.40898e-19	3.37602			0.00364868	2.11671e-10	1.05835e-10	3.32372e-33	3.53029e-19	9.96426e-25	9.67554e-17	1.09385e+06	5.44968e-19	3.40142	0.000304056	3.04806e-08	1.27003e-09	2.76977e-34	4.23635e-18	#REF!	1.39328e-14	91153.8	3.7845e-21	0.023621	-5.41183e-19	-3.37596	0.999982		5.1492e-09	2.48322e-13	-5.14615e-09	5.44968e-19	3.7845e-21	-5.40889e-19	-3.37596	1
2–25	2	25		82259.2	109504	27244.4	5.84175e-08	5.41195e-19	3.37787			0.00364868	2.11671e-10	1.05835e-10	3.32372e-33	3.53029e-19	9.96426e-25	9.67554e-17	1.09385e+06	5.44968e-19	3.40142	0.000291894	3.30736e-08	1.32294e-09	2.65898e-34	4.41286e-18	#REF!	1.5118e-14	87507.6	3.48779e-21	0.0217691	-5.4148e-19	-3.37781	0.999982		5.1492e-09	2.10911e-13	-5.14619e-09	5.44968e-19	3.4878e-21	-5.41186e-19	-3.37781	1
2–26	2	26		82259.2	109517	27257.6	5.83891e-08	5.41458e-19	3.37951			0.00364868	2.11671e-10	1.05835e-10	3.32372e-33	3.53029e-19	9.96426e-25	9.67554e-17	1.09385e+06	5.44968e-19	3.40142	0.000280667	3.57724e-08	1.37586e-09	2.55671e-34	4.58938e-18	#REF!	1.63517e-14	84142	3.22466e-21	0.0201268	-5.41743e-19	-3.37945	0.999982		5.1492e-09	1.80288e-13	-5.14622e-09	5.44968e-19	3.22466e-21	-5.41449e-19	-3.37946	1
2–27	2	27		82259.2	109529	27269.4	5.83639e-08	5.41692e-19	3.38098			0.00364868	2.11671e-10	1.05835e-10	3.32372e-33	3.53029e-19	9.96426e-25	9.67554e-17	1.09385e+06	5.44968e-19	3.40142	0.000270272	3.8577e-08	1.42878e-09	2.46201e-34	4.76589e-18	#REF!	1.76337e-14	81025.6	2.99022e-21	0.0186635	-5.41978e-19	-3.38092	0.999982		5.1492e-09	1.55026e-13	-5.14625e-09	5.44968e-19	2.99022e-21	-5.41683e-19	-3.38092	1
2–28	2	28		82259.2	109539	27280	5.83413e-08	5.41902e-19	3.38229			0.00364868	2.11671e-10	1.05835e-10	3.32372e-33	3.53029e-19	9.96426e-25	9.67554e-17	1.09385e+06	5.44968e-19	3.40142	0.00026062	4.14875e-08	1.4817e-09	2.37409e-34	4.94241e-18	#REF!	1.89641e-14	78131.8	2.78045e-21	0.0173542	-5.42187e-19	-3.38223	0.999982		5.1492e-09	1.34038e-13	-5.14627e-09	5.44968e-19	2.78045e-21	-5.41893e-19	-3.38223	1
2–29	2	29		82259.2	109549	27289.5	5.8321e-08	5.4209e-19	3.38346			0.00364868	2.11671e-10	1.05835e-10	3.32372e-33	3.53029e-19	9.96426e-25	9.67554e-17	1.09385e+06	5.44968e-19	3.40142	0.000251633	4.45038e-08	1.53461e-09	2.29222e-34	5.11892e-18	#REF!	2.03428e-14	75437.6	2.592e-21	0.016178	-5.42376e-19	-3.3834	0.999982		5.1492e-09	1.16484e-13	-5.14628e-09	5.44968e-19	2.592e-21	-5.42081e-19	-3.3834	1
2–30	2	30		82259.2	109557	27298	5.83028e-08	5.4226e-19	3.38452			0.00364868	2.11671e-10	1.05835e-10	3.32372e-33	3.53029e-19	9.96426e-25	9.67554e-17	1.09385e+06	5.44968e-19	3.40142	0.000243245	4.76259e-08	1.58753e-09	2.21581e-34	5.29544e-18	#REF!	2.177e-14	72923	2.42208e-21	0.0151174	-5.42546e-19	-3.38446	0.999982		5.1492e-09	1.01713e-13	-5.1463e-09	5.44968e-19	2.42208e-21	-5.42251e-19	-3.38446	1
2–31	2	31		82259.2	109565	27305.8	5.82862e-08	5.42414e-19	3.38548			0.00364868	2.11671e-10	1.05835e-10	3.32372e-33	3.53029e-19	9.96426e-25	9.67554e-17	1.09385e+06	5.44968e-19	3.40142	0.000235398	5.08539e-08	1.64045e-09	2.14433e-34	5.47195e-18	#REF!	2.32455e-14	70570.7	2.26834e-21	0.0141578	-5.427e-19	-3.38542	0.999982		5.1492e-09	8.92099e-14	-5.14631e-09	5.44968e-19	2.26834e-21	-5.42404e-19	-3.38542	1
2–32	2	32		82259.2	109572	27312.8	5.82713e-08	5.42553e-19	3.38635			0.00364868	2.11671e-10	1.05835e-10	3.32372e-33	3.53029e-19	9.96426e-25	9.67554e-17	1.09385e+06	5.44968e-19	3.40142	0.000228042	5.41877e-08	1.69337e-09	2.07732e-34	5.64847e-18	#REF!	2.47694e-14	68365.3	2.12878e-21	0.0132868	-5.42839e-19	-3.38629	0.999982		5.1492e-09	7.85706e-14	-5.14632e-09	5.44968e-19	2.12878e-21	-5.42544e-19	-3.38629	1
2–33	2	33		82259.2	109578	27319.2	5.82576e-08	5.4268e-19	3.38714			0.00364868	2.11671e-10	1.05835e-10	3.32372e-33	3.53029e-19	9.96426e-25	9.67554e-17	1.09385e+06	5.44968e-19	3.40142	0.000221132	5.76274e-08	1.74628e-09	2.01438e-34	5.82498e-18	#REF!	2.63417e-14	66293.7	2.00172e-21	0.0124937	-5.42966e-19	-3.38708	0.999982		5.1492e-09	6.94711e-14	-5.14633e-09	5.44968e-19	2.00172e-21	-5.42671e-19	-3.38709	1
2–34	2	34		82259.2	109584	27325	5.82452e-08	5.42796e-19	3.38787			0.00364868	2.11671e-10	1.05835e-10	3.32372e-33	3.53029e-19	9.96426e-25	9.67554e-17	1.09385e+06	5.44968e-19	3.40142	0.000214628	6.11729e-08	1.7992e-09	1.95513e-34	6.00149e-18	#REF!	2.79623e-14	64343.9	1.8857e-21	0.0117696	-5.43082e-19	-3.38781	0.999982		5.1492e-09	6.16516e-14	-5.14634e-09	5.44968e-19	1.8857e-21	-5.42787e-19	-3.38781	1
2–35	2	35		82259.2	109590	27330.3	5.82338e-08	5.42902e-19	3.38853			0.00364868	2.11671e-10	1.05835e-10	3.32372e-33	3.53029e-19	9.96426e-25	9.67554e-17	1.09385e+06	5.44968e-19	3.40142	0.000208496	6.48242e-08	1.85212e-09	1.89927e-34	6.17801e-18	#REF!	2.96313e-14	62505.5	1.77949e-21	0.0111067	-5.43188e-19	-3.38847	0.999982		5.1492e-09	5.4902e-14	-5.14635e-09	5.44968e-19	1.77949e-21	-5.42893e-19	-3.38847	1
2–36	2	36		82259.2	109594	27335.3	5.82233e-08	5.43e-19	3.38914			0.00364868	2.11671e-10	1.05835e-10	3.32372e-33	3.53029e-19	9.96426e-25	9.67554e-17	1.09385e+06	5.44968e-19	3.40142	0.000202704	6.85814e-08	1.90504e-09	1.84651e-34	6.35452e-18	#REF!	3.13487e-14	60769.2	1.682e-21	0.0104982	-5.43286e-19	-3.38908	0.999982		5.1492e-09	4.90512e-14	-5.14635e-09	5.44968e-19	1.682e-21	-5.4299e-19	-3.38908	1
2–37	2	37		82259.2	109599	27339.8	5.82137e-08	5.43089e-19	3.3897			0.00364868	2.11671e-10	1.05835e-10	3.32372e-33	3.53029e-19	9.96426e-25	9.67554e-17	1.09385e+06	5.44968e-19	3.40142	0.000197226	7.24444e-08	1.95796e-09	1.7966e-34	6.53104e-18	#REF!	3.31145e-14	59126.8	1.59231e-21	0.00993841	-5.43376e-19	-3.38964	0.999982		5.1492e-09	4.39595e-14	-5.14636e-09	5.44968e-19	1.59231e-21	-5.4308e-19	-3.38964	1
2–38	2	38		82259.2	109603	27343.9	5.82049e-08	5.43172e-19	3.39021			0.00364868	2.11671e-10	1.05835e-10	3.32372e-33	3.53029e-19	9.96426e-25	9.67554e-17	1.09385e+06	5.44968e-19	3.40142	0.000192036	7.64132e-08	2.01087e-09	1.74933e-34	6.70755e-18	#REF!	3.49287e-14	57570.8	1.50961e-21	0.00942222	-5.43458e-19	-3.39015	0.999982		5.1492e-09	3.95117e-14	-5.14636e-09	5.44968e-19	1.50961e-21	-5.43163e-19	-3.39016	1
2–39	2	39		82259.2	109607	27347.8	5.81967e-08	5.43248e-19	3.39069			0.00364868	2.11671e-10	1.05835e-10	3.32372e-33	3.53029e-19	9.96426e-25	9.67554e-17	1.09385e+06	5.44968e-19	3.40142	0.000187112	8.04879e-08	2.06379e-09	1.70447e-34	6.88407e-18	#REF!	3.67912e-14	56094.6	1.43318e-21	0.00894523	-5.43535e-19	-3.39063	0.999982		5.1492e-09	3.56124e-14	-5.14636e-09	5.44968e-19	1.43318e-21	-5.43239e-19	-3.39063	1
2–40	2	40		82259.2	109610	27351.3	5.81891e-08	5.43319e-19	3.39113			0.00364868	2.11671e-10	1.05835e-10	3.32372e-33	3.53029e-19	9.96426e-25	9.67554e-17	1.09385e+06	5.44968e-19	3.40142	0.000182434	8.46684e-08	2.11671e-09	1.66186e-34	7.06058e-18	#REF!	3.87022e-14	54692.3	1.36242e-21	0.00850355	-5.43605e-19	-3.39107	0.999982		5.1492e-09	3.21825e-14	-5.14637e-09	5.44968e-19	1.36242e-21	-5.4331e-19	-3.39107	1
3–4 (Pα)	3	4		97492.3	102824	5331.6	2.98513e-07	1.05909e-19	0.661033			0.00243245	4.76259e-10	1.58753e-10	2.21581e-33	5.29544e-19	6.64284e-25	2.177e-16	729230	2.42208e-19	1.51174	0.00182434	8.46684e-10	2.11671e-10	1.66186e-33	7.06058e-19	#REF!	3.87022e-16	546923	1.36242e-19	0.850355	-1.05966e-19	-0.661028	0.999991		1.01713e-09	3.21825e-10	-6.94923e-10	2.42208e-19	1.36242e-19	-1.05908e-19	-0.661028	1
3–5 (Pß)	3	5		97492.3	105292	7799.36	2.04062e-07	1.5493e-19	0.966997			0.00243245	4.76259e-10	1.58753e-10	2.21581e-33	5.29544e-19	6.64284e-25	2.177e-16	729230	2.42208e-19	1.51174	0.00145947	1.32294e-09	2.64589e-10	1.32949e-33	8.82573e-19	#REF!	6.04721e-16	437538	8.71949e-20	0.544228	-1.55013e-19	-0.966989	0.999992		1.01713e-09	1.3182e-10	-8.84825e-10	2.42208e-19	8.71949e-20	-1.54929e-19	-0.966989	1
3–6 (Pγ)	3	6		97492.3	106632	9139.88	1.74133e-07	1.81559e-19	1.1332			0.00243245	4.76259e-10	1.58753e-10	2.21581e-33	5.29544e-19	6.64284e-25	2.177e-16	729230	2.42208e-19	1.51174	0.00121623	1.90504e-09	3.17506e-10	1.10791e-33	1.05909e-18	#REF!	8.70798e-16	364615	6.0552e-20	0.377936	-1.81656e-19	-1.13319	0.999992		1.01713e-09	6.35704e-11	-9.53037e-10	2.42208e-19	6.0552e-20	-1.81557e-19	-1.13319	1
3–7 (Pδ)	3	7		97492.3	107440	9948.16	1.59984e-07	1.97615e-19	1.23341			0.00243245	4.76259e-10	1.58753e-10	2.21581e-33	5.29544e-19	6.64284e-25	2.177e-16	729230	2.42208e-19	1.51174	0.00104248	2.59297e-09	3.70424e-10	9.49634e-34	1.2356e-18	#REF!	1.18525e-15	312527	4.44872e-20	0.277667	-1.97721e-19	-1.2334	0.999992		1.01713e-09	3.43137e-11	-9.82278e-10	2.42208e-19	4.44872e-20	-1.97613e-19	-1.2334	1
3–8 (Pε)	3	8		97492.3	107965	10473	1.51966e-07	2.08041e-19	1.29849			0.00243245	4.76259e-10	1.58753e-10	2.21581e-33	5.29544e-19	6.64284e-25	2.177e-16	729230	2.42208e-19	1.51174	0.000912169	3.38673e-09	4.23342e-10	8.3093e-34	1.41212e-18	#REF!	1.54809e-15	273461	3.40605e-20	0.212589	-2.08147e-19	-1.29845	0.999966		1.01713e-09	2.01141e-11	-9.9647e-10	2.42208e-19	3.40605e-20	-2.08034e-19	-1.29845	1
3–9	3	9		97492.3	108325	10832.7	1.46921e-07	2.15186e-19	1.34308			0.00243245	4.76259e-10	1.58753e-10	2.21581e-33	5.29544e-19	6.64284e-25	2.177e-16	729230	2.42208e-19	1.51174	0.000810817	4.28634e-09	4.76259e-10	7.38604e-34	1.58863e-18	#REF!	1.9593e-15	243077	2.6912e-20	0.167971	-2.15296e-19	-1.34304	0.999967		1.01713e-09	1.25571e-11	-1.00402e-09	2.42208e-19	2.6912e-20	-2.15179e-19	-1.34304	1
3–10	3	10		97492.3	108582	11090	1.43512e-07	2.20296e-19	1.37498			0.00243245	4.76259e-10	1.58753e-10	2.21581e-33	5.29544e-19	6.64284e-25	2.177e-16	729230	2.42208e-19	1.51174	0.000729735	5.29177e-09	5.29177e-10	6.64744e-34	1.76515e-18	#REF!	2.41888e-15	218769	2.17987e-20	0.136057	-2.20409e-19	-1.37494	0.999968		1.01713e-09	8.23872e-12	-1.00834e-09	2.42208e-19	2.17987e-20	-2.20289e-19	-1.37494	1
3–11	3	11		97492.3	108773	11280.3	1.41091e-07	2.24078e-19	1.39858			0.00243245	4.76259e-10	1.58753e-10	2.21581e-33	5.29544e-19	6.64284e-25	2.177e-16	729230	2.42208e-19	1.51174	0.000663396	6.40304e-09	5.82095e-10	6.04313e-34	1.94166e-18	#REF!	2.92685e-15	198881	1.80155e-20	0.112444	-2.24192e-19	-1.39854	0.999968		1.01713e-09	5.62716e-12	-1.01095e-09	2.42208e-19	1.80155e-20	-2.24071e-19	-1.39854	1
3–12	3	12		97492.3	108917	11425.1	1.39303e-07	2.26954e-19	1.41653			0.00243245	4.76259e-10	1.58753e-10	2.21581e-33	5.29544e-19	6.64284e-25	2.177e-16	729230	2.42208e-19	1.51174	0.000608113	7.62015e-09	6.35013e-10	5.53953e-34	2.11817e-18	#REF!	3.48319e-15	182308	1.5138e-20	0.0944839	-2.2707e-19	-1.41649	0.999968		1.01713e-09	3.97315e-12	-1.0126e-09	2.42208e-19	1.5138e-20	-2.26946e-19	-1.41649	1
3–13	3	13		97492.3	109030	11537.8	1.37942e-07	2.29192e-19	1.4305			0.00243245	4.76259e-10	1.58753e-10	2.21581e-33	5.29544e-19	6.64284e-25	2.177e-16	729230	2.42208e-19	1.51174	0.000561335	8.94309e-09	6.8793e-10	5.11341e-34	2.29469e-18	#REF!	4.08791e-15	168284	1.28986e-20	0.080507	-2.29309e-19	-1.43046	0.999969		1.01713e-09	2.88461e-12	-1.01369e-09	2.42208e-19	1.28987e-20	-2.29185e-19	-1.43046	1
3–14	3	14		97492.3	109119	11627.2	1.36882e-07	2.30968e-19	1.44159			0.00243245	4.76259e-10	1.58753e-10	2.21581e-33	5.29544e-19	6.64284e-25	2.177e-16	729230	2.42208e-19	1.51174	0.000521239	1.03719e-08	7.40848e-10	4.74817e-34	2.4712e-18	#REF!	4.74101e-15	156264	1.11218e-20	0.0694168	-2.31086e-19	-1.44154	0.999969		1.01713e-09	2.14461e-12	-1.01443e-09	2.42208e-19	1.11218e-20	-2.3096e-19	-1.44154	1
3–15	3	15		97492.3	109192	11699.3	1.36038e-07	2.324e-19	1.45053			0.00243245	4.76259e-10	1.58753e-10	2.21581e-33	5.29544e-19	6.64284e-25	2.177e-16	729230	2.42208e-19	1.51174	0.00048649	1.19065e-08	7.93766e-10	4.43163e-34	2.64772e-18	#REF!	5.44249e-15	145846	9.68832e-21	0.0604697	-2.3252e-19	-1.45048	0.999969		1.01713e-09	1.6274e-12	-1.01495e-09	2.42208e-19	9.68832e-21	-2.32393e-19	-1.45048	1
3–16	3	16		97492.3	109251	11758.3	1.35355e-07	2.33573e-19	1.45785			0.00243245	4.76259e-10	1.58753e-10	2.21581e-33	5.29544e-19	6.64284e-25	2.177e-16	729230	2.42208e-19	1.51174	0.000456085	1.35469e-08	8.46684e-10	4.15465e-34	2.82423e-18	#REF!	6.19234e-15	136731	8.51512e-21	0.0531472	-2.33693e-19	-1.4578	0.999969		1.01713e-09	1.25713e-12	-1.01532e-09	2.42208e-19	8.51513e-21	-2.33566e-19	-1.4578	1
3–17	3	17		97492.3	109300	11807.3	1.34794e-07	2.34545e-19	1.46391			0.00243245	4.76259e-10	1.58753e-10	2.21581e-33	5.29544e-19	6.64284e-25	2.177e-16	729230	2.42208e-19	1.51174	0.000429256	1.52932e-08	8.99601e-10	3.91026e-34	3.00075e-18	#REF!	6.99058e-15	128688	7.54281e-21	0.0470785	-2.34665e-19	-1.46387	0.999969		1.01713e-09	9.86426e-13	-1.01559e-09	2.42208e-19	7.54281e-21	-2.34538e-19	-1.46387	1
3–18	3	18		97492.3	109341	11848.2	1.34328e-07	2.35359e-19	1.469			0.00243245	4.76259e-10	1.58753e-10	2.21581e-33	5.29544e-19	6.64284e-25	2.177e-16	729230	2.42208e-19	1.51174	0.000405408	1.71453e-08	9.52519e-10	3.69302e-34	3.17726e-18	#REF!	7.83719e-15	121538	6.728e-21	0.0419929	-2.3548e-19	-1.46895	0.999969		1.01713e-09	7.8482e-13	-1.01579e-09	2.42208e-19	6.728e-21	-2.35352e-19	-1.46895	1
3–19	3	19		97492.3	109375	11882.9	1.33936e-07	2.36048e-19	1.4733			0.00243245	4.76259e-10	1.58753e-10	2.21581e-33	5.29544e-19	6.64284e-25	2.177e-16	729230	2.42208e-19	1.51174	0.000384071	1.91033e-08	1.00544e-09	3.49865e-34	3.35378e-18	#REF!	8.73217e-15	115142	6.03843e-21	0.0376889	-2.3617e-19	-1.47325	0.99997		1.01713e-09	6.32187e-13	-1.01594e-09	2.42208e-19	6.03843e-21	-2.36041e-19	-1.47325	1
3–20	3	20		97492.3	109405	11912.6	1.33603e-07	2.36637e-19	1.47697			0.00243245	4.76259e-10	1.58753e-10	2.21581e-33	5.29544e-19	6.64284e-25	2.177e-16	729230	2.42208e-19	1.51174	0.000364868	2.11671e-08	1.05835e-09	3.32372e-34	3.53029e-18	#REF!	9.67554e-15	109385	5.44968e-21	0.0340142	-2.36758e-19	-1.47692	0.99997		1.01713e-09	5.1492e-13	-1.01606e-09	2.42208e-19	5.44968e-21	-2.3663e-19	-1.47693	1
4–5	4	5		102824	105292	2467.76	6.44936e-07	4.90208e-20	0.305964			0.00182434	8.46684e-10	2.11671e-10	1.66186e-33	7.06058e-19	4.98213e-25	3.87022e-16	546923	1.36242e-19	0.850355	0.00145947	1.32294e-09	2.64589e-10	1.32949e-33	8.82573e-19	#REF!	6.04721e-16	437538	8.71949e-20	0.544228	-4.90471e-20	-0.305961	0.999992		3.21825e-10	1.3182e-10	-1.89902e-10	1.36242e-19	8.71949e-20	-4.90204e-20	-0.305961	1
4–6	4	6		102824	106632	3808.28	4.17918e-07	7.56494e-20	0.472166			0.00182434	8.46684e-10	2.11671e-10	1.66186e-33	7.06058e-19	4.98213e-25	3.87022e-16	546923	1.36242e-19	0.850355	0.00121623	1.90504e-09	3.17506e-10	1.10791e-33	1.05909e-18	#REF!	8.70798e-16	364615	6.0552e-20	0.377936	-7.569e-20	-0.472163	0.999992		3.21825e-10	6.35704e-11	-2.58114e-10	1.36242e-19	6.0552e-20	-7.56488e-20	-0.472163	1
4–7	4	7		102824	107440	4616.57	3.44748e-07	9.17055e-20	0.572381			0.00182434	8.46684e-10	2.11671e-10	1.66186e-33	7.06058e-19	4.98213e-25	3.87022e-16	546923	1.36242e-19	0.850355	0.00104248	2.59297e-09	3.70424e-10	9.49634e-34	1.2356e-18	#REF!	1.18525e-15	312527	4.44872e-20	0.277667	-9.17548e-20	-0.572377	0.999993		3.21825e-10	3.43137e-11	-2.87355e-10	1.36242e-19	4.44872e-20	-9.17049e-20	-0.572377	1
4–8	4	8		102824	107965	5141.45	3.09553e-07	1.02132e-19	0.637458			0.00182434	8.46684e-10	2.11671e-10	1.66186e-33	7.06058e-19	4.98213e-25	3.87022e-16	546923	1.36242e-19	0.850355	0.000912169	3.38673e-09	4.23342e-10	8.3093e-34	1.41212e-18	#REF!	1.54809e-15	273461	3.40605e-20	0.212589	-1.02181e-19	-0.637419	0.999939		3.21825e-10	2.01141e-11	-3.01547e-10	1.36242e-19	3.40605e-20	-1.02126e-19	-0.63742	1
4–9	4	9		102824	108325	5501.12	2.89314e-07	1.09277e-19	0.682051			0.00182434	8.46684e-10	2.11671e-10	1.66186e-33	7.06058e-19	4.98213e-25	3.87022e-16	546923	1.36242e-19	0.850355	0.000810817	4.28634e-09	4.76259e-10	7.38604e-34	1.58863e-18	#REF!	1.9593e-15	243077	2.6912e-20	0.167971	-1.0933e-19	-0.682013	0.999943		3.21825e-10	1.25571e-11	-3.091e-10	1.36242e-19	2.6912e-20	-1.09271e-19	-0.682013	1
4–10	4	10		102824	108582	5758.39	2.76388e-07	1.14387e-19	0.713949			0.00182434	8.46684e-10	2.11671e-10	1.66186e-33	7.06058e-19	4.98213e-25	3.87022e-16	546923	1.36242e-19	0.850355	0.000729735	5.29177e-09	5.29177e-10	6.64744e-34	1.76515e-18	#REF!	2.41888e-15	218769	2.17987e-20	0.136057	-1.14443e-19	-0.71391	0.999946		3.21825e-10	8.23872e-12	-3.13416e-10	1.36242e-19	2.17987e-20	-1.14381e-19	-0.71391	1
4–11	4	11		102824	108773	5948.74	2.67544e-07	1.18168e-19	0.737549			0.00182434	8.46684e-10	2.11671e-10	1.66186e-33	7.06058e-19	4.98213e-25	3.87022e-16	546923	1.36242e-19	0.850355	0.000663396	6.40304e-09	5.82095e-10	6.04313e-34	1.94166e-18	#REF!	2.92685e-15	198881	1.80155e-20	0.112444	-1.18227e-19	-0.73751	0.999947		3.21825e-10	5.62716e-12	-3.16026e-10	1.36242e-19	1.80155e-20	-1.18162e-19	-0.737511	1
4–12	4	12		102824	108917	6093.51	2.61188e-07	1.21044e-19	0.755499			0.00182434	8.46684e-10	2.11671e-10	1.66186e-33	7.06058e-19	4.98213e-25	3.87022e-16	546923	1.36242e-19	0.850355	0.000608113	7.62015e-09	6.35013e-10	5.53953e-34	2.11817e-18	#REF!	3.48319e-15	182308	1.5138e-20	0.0944839	-1.21104e-19	-0.75546	0.999948		3.21825e-10	3.97315e-12	-3.17679e-10	1.36242e-19	1.5138e-20	-1.21038e-19	-0.75546	1
4–13	4	13		102824	109030	6206.18	2.56446e-07	1.23282e-19	0.769468			0.00182434	8.46684e-10	2.11671e-10	1.66186e-33	7.06058e-19	4.98213e-25	3.87022e-16	546923	1.36242e-19	0.850355	0.000561335	8.94309e-09	6.8793e-10	5.11341e-34	2.29469e-18	#REF!	4.08791e-15	168284	1.28986e-20	0.080507	-1.23343e-19	-0.769429	0.999949		3.21825e-10	2.88461e-12	-3.18767e-10	1.36242e-19	1.28987e-20	-1.23276e-19	-0.76943	1
4–14	4	14		102824	109119	6295.58	2.52804e-07	1.25058e-19	0.780553			0.00182434	8.46684e-10	2.11671e-10	1.66186e-33	7.06058e-19	4.98213e-25	3.87022e-16	546923	1.36242e-19	0.850355	0.000521239	1.03719e-08	7.40848e-10	4.74817e-34	2.4712e-18	#REF!	4.74101e-15	156264	1.11218e-20	0.0694168	-1.2512e-19	-0.780514	0.99995		3.21825e-10	2.14461e-12	-3.19507e-10	1.36242e-19	1.11218e-20	-1.25052e-19	-0.780514	1
4–15	4	15		102824	109192	6367.71	2.49941e-07	1.26491e-19	0.789495			0.00182434	8.46684e-10	2.11671e-10	1.66186e-33	7.06058e-19	4.98213e-25	3.87022e-16	546923	1.36242e-19	0.850355	0.00048649	1.19065e-08	7.93766e-10	4.43163e-34	2.64772e-18	#REF!	5.44249e-15	145846	9.68832e-21	0.0604697	-1.26554e-19	-0.789456	0.999951		3.21825e-10	1.6274e-12	-3.20023e-10	1.36242e-19	9.68832e-21	-1.26485e-19	-0.789456	1
4–16	4	16		102824	109251	6426.74	2.47645e-07	1.27664e-19	0.796813			0.00182434	8.46684e-10	2.11671e-10	1.66186e-33	7.06058e-19	4.98213e-25	3.87022e-16	546923	1.36242e-19	0.850355	0.000456085	1.35469e-08	8.46684e-10	4.15465e-34	2.82423e-18	#REF!	6.19234e-15	136731	8.51512e-21	0.0531472	-1.27727e-19	-0.796774	0.999951		3.21825e-10	1.25713e-12	-3.20394e-10	1.36242e-19	8.51513e-21	-1.27657e-19	-0.796775	1
4–17	4	17		102824	109300	6475.66	2.45774e-07	1.28635e-19	0.802879			0.00182434	8.46684e-10	2.11671e-10	1.66186e-33	7.06058e-19	4.98213e-25	3.87022e-16	546923	1.36242e-19	0.850355	0.000429256	1.52932e-08	8.99601e-10	3.91026e-34	3.00075e-18	#REF!	6.99058e-15	128688	7.54281e-21	0.0470785	-1.28699e-19	-0.80284	0.999951		3.21825e-10	9.86426e-13	-3.20664e-10	1.36242e-19	7.54281e-21	-1.28629e-19	-0.80284	1
4–18	4	18		102824	109341	6516.65	2.44228e-07	1.2945e-19	0.807962			0.00182434	8.46684e-10	2.11671e-10	1.66186e-33	7.06058e-19	4.98213e-25	3.87022e-16	546923	1.36242e-19	0.850355	0.000405408	1.71453e-08	9.52519e-10	3.69302e-34	3.17726e-18	#REF!	7.83719e-15	121538	6.728e-21	0.0419929	-1.29514e-19	-0.807923	0.999952		3.21825e-10	7.8482e-13	-3.20866e-10	1.36242e-19	6.728e-21	-1.29444e-19	-0.807923	1
4–19	4	19		102824	109375	6551.35	2.42935e-07	1.30139e-19	0.812263			0.00182434	8.46684e-10	2.11671e-10	1.66186e-33	7.06058e-19	4.98213e-25	3.87022e-16	546923	1.36242e-19	0.850355	0.000384071	1.91033e-08	1.00544e-09	3.49865e-34	3.35378e-18	#REF!	8.73217e-15	115142	6.03843e-21	0.0376889	-1.30204e-19	-0.812224	0.999952		3.21825e-10	6.32187e-13	-3.21018e-10	1.36242e-19	6.03843e-21	-1.30133e-19	-0.812225	1
4–20	4	20		102824	109405	6580.97	2.41841e-07	1.30727e-19	0.815936			0.00182434	8.46684e-10	2.11671e-10	1.66186e-33	7.06058e-19	4.98213e-25	3.87022e-16	546923	1.36242e-19	0.850355	0.000364868	2.11671e-08	1.05835e-09	3.32372e-34	3.53029e-18	#REF!	9.67554e-15	109385	5.44968e-21	0.0340142	-1.30792e-19	-0.815897	0.999952		3.21825e-10	5.1492e-13	-3.21135e-10	1.36242e-19	5.44968e-21	-1.30721e-19	-0.815897	1
5–7	5	7		105292	107440	2148.8	7.40669e-07	4.26847e-20	0.266417			0.00145947	1.32294e-09	2.64589e-10	1.32949e-33	8.82573e-19	3.9857e-25	6.04721e-16	437538	8.71949e-20	0.544228	0.00104248	2.59297e-09	3.70424e-10	9.49634e-34	1.2356e-18	#REF!	1.18525e-15	312527	4.44872e-20	0.277667	-4.27077e-20	-0.266415	0.999993		1.3182e-10	3.43137e-11	-9.74528e-11	8.71949e-20	4.44872e-20	-4.26845e-20	-0.266415	1
5–8	5	8		105292	107965	2673.68	5.95265e-07	5.31113e-20	0.331494			0.00145947	1.32294e-09	2.64589e-10	1.32949e-33	8.82573e-19	3.9857e-25	6.04721e-16	437538	8.71949e-20	0.544228	0.000912169	3.38673e-09	4.23342e-10	8.3093e-34	1.41212e-18	#REF!	1.54809e-15	273461	3.40605e-20	0.212589	-5.31344e-20	-0.331458	0.99989		1.3182e-10	2.01141e-11	-1.11645e-10	8.71949e-20	3.40605e-20	-5.31055e-20	-0.331458	1
5–9	5	9		105292	108325	3033.35	5.24683e-07	6.02559e-20	0.376088			0.00145947	1.32294e-09	2.64589e-10	1.32949e-33	8.82573e-19	3.9857e-25	6.04721e-16	437538	8.71949e-20	0.544228	0.000810817	4.28634e-09	4.76259e-10	7.38604e-34	1.58863e-18	#REF!	1.9593e-15	243077	2.6912e-20	0.167971	-6.02829e-20	-0.376051	0.999903		1.3182e-10	1.25571e-11	-1.19198e-10	8.71949e-20	2.6912e-20	-6.02501e-20	-0.376051	1
5–10	5	10		105292	108582	3290.62	4.83662e-07	6.53664e-20	0.407985			0.00145947	1.32294e-09	2.64589e-10	1.32949e-33	8.82573e-19	3.9857e-25	6.04721e-16	437538	8.71949e-20	0.544228	0.000729735	5.29177e-09	5.29177e-10	6.64744e-34	1.76515e-18	#REF!	2.41888e-15	218769	2.17987e-20	0.136057	-6.53961e-20	-0.407948	0.999911		1.3182e-10	8.23872e-12	-1.23514e-10	8.71949e-20	2.17987e-20	-6.53606e-20	-0.407949	1
5–11	5	11		105292	108773	3480.97	4.57214e-07	6.91476e-20	0.431585			0.00145947	1.32294e-09	2.64589e-10	1.32949e-33	8.82573e-19	3.9857e-25	6.04721e-16	437538	8.71949e-20	0.544228	0.000663396	6.40304e-09	5.82095e-10	6.04313e-34	1.94166e-18	#REF!	2.92685e-15	198881	1.80155e-20	0.112444	-6.91794e-20	-0.431549	0.999915		1.3182e-10	5.62716e-12	-1.26124e-10	8.71949e-20	1.80155e-20	-6.91418e-20	-0.431549	1
5–12	5	12		105292	108917	3625.75	4.38957e-07	7.20235e-20	0.449535			0.00145947	1.32294e-09	2.64589e-10	1.32949e-33	8.82573e-19	3.9857e-25	6.04721e-16	437538	8.71949e-20	0.544228	0.000608113	7.62015e-09	6.35013e-10	5.53953e-34	2.11817e-18	#REF!	3.48319e-15	182308	1.5138e-20	0.0944839	-7.20569e-20	-0.449499	0.999918		1.3182e-10	3.97315e-12	-1.27777e-10	8.71949e-20	1.5138e-20	-7.20177e-20	-0.449499	1
5–13	5	13		105292	109030	3738.42	4.25728e-07	7.42616e-20	0.463505			0.00145947	1.32294e-09	2.64589e-10	1.32949e-33	8.82573e-19	3.9857e-25	6.04721e-16	437538	8.71949e-20	0.544228	0.000561335	8.94309e-09	6.8793e-10	5.11341e-34	2.29469e-18	#REF!	4.08791e-15	168284	1.28986e-20	0.080507	-7.42962e-20	-0.463468	0.999921		1.3182e-10	2.88461e-12	-1.28865e-10	8.71949e-20	1.28987e-20	-7.42558e-20	-0.463468	1
5–14	5	14		105292	109119	3827.82	4.15785e-07	7.60375e-20	0.474589			0.00145947	1.32294e-09	2.64589e-10	1.32949e-33	8.82573e-19	3.9857e-25	6.04721e-16	437538	8.71949e-20	0.544228	0.000521239	1.03719e-08	7.40848e-10	4.74817e-34	2.4712e-18	#REF!	4.74101e-15	156264	1.11218e-20	0.0694168	-7.60731e-20	-0.474552	0.999923		1.3182e-10	2.14461e-12	-1.29604e-10	8.71949e-20	1.11218e-20	-7.60317e-20	-0.474553	1
5–15	5	15		105292	109192	3899.94	4.08096e-07	7.74702e-20	0.483531			0.00145947	1.32294e-09	2.64589e-10	1.32949e-33	8.82573e-19	3.9857e-25	6.04721e-16	437538	8.71949e-20	0.544228	0.00048649	1.19065e-08	7.93766e-10	4.43163e-34	2.64772e-18	#REF!	5.44249e-15	145846	9.68832e-21	0.0604697	-7.75065e-20	-0.483494	0.999924		1.3182e-10	1.6274e-12	-1.30121e-10	8.71949e-20	9.68832e-21	-7.74644e-20	-0.483495	1
5–16	5	16		105292	109251	3958.97	4.02011e-07	7.86428e-20	0.49085			0.00145947	1.32294e-09	2.64589e-10	1.32949e-33	8.82573e-19	3.9857e-25	6.04721e-16	437538	8.71949e-20	0.544228	0.000456085	1.35469e-08	8.46684e-10	4.15465e-34	2.82423e-18	#REF!	6.19234e-15	136731	8.51512e-21	0.0531472	-7.86797e-20	-0.490813	0.999925		1.3182e-10	1.25713e-12	-1.30491e-10	8.71949e-20	8.51513e-21	-7.8637e-20	-0.490813	1
5–17	5	17		105292	109300	4007.89	3.97104e-07	7.96146e-20	0.496915			0.00145947	1.32294e-09	2.64589e-10	1.32949e-33	8.82573e-19	3.9857e-25	6.04721e-16	437538	8.71949e-20	0.544228	0.000429256	1.52932e-08	8.99601e-10	3.91026e-34	3.00075e-18	#REF!	6.99058e-15	128688	7.54281e-21	0.0470785	-7.96521e-20	-0.496878	0.999926		1.3182e-10	9.86426e-13	-1.30762e-10	8.71949e-20	7.54281e-21	-7.96087e-20	-0.496879	1
5–18	5	18		105292	109341	4048.89	3.93083e-07	8.04289e-20	0.501998			0.00145947	1.32294e-09	2.64589e-10	1.32949e-33	8.82573e-19	3.9857e-25	6.04721e-16	437538	8.71949e-20	0.544228	0.000405408	1.71453e-08	9.52519e-10	3.69302e-34	3.17726e-18	#REF!	7.83719e-15	121538	6.728e-21	0.0419929	-8.04669e-20	-0.501961	0.999927		1.3182e-10	7.8482e-13	-1.30963e-10	8.71949e-20	6.728e-21	-8.04231e-20	-0.501962	1
5–19	5	19		105292	109375	4083.58	3.89743e-07	8.11181e-20	0.5063			0.00145947	1.32294e-09	2.64589e-10	1.32949e-33	8.82573e-19	3.9857e-25	6.04721e-16	437538	8.71949e-20	0.544228	0.000384071	1.91033e-08	1.00544e-09	3.49865e-34	3.35378e-18	#REF!	8.73217e-15	115142	6.03843e-21	0.0376889	-8.11564e-20	-0.506263	0.999928		1.3182e-10	6.32187e-13	-1.31116e-10	8.71949e-20	6.03843e-21	-8.11123e-20	-0.506263	1
5–20	5	20		105292	109405	4113.21	3.86937e-07	8.17066e-20	0.509972			0.00145947	1.32294e-09	2.64589e-10	1.32949e-33	8.82573e-19	3.9857e-25	6.04721e-16	437538	8.71949e-20	0.544228	0.000364868	2.11671e-08	1.05835e-09	3.32372e-34	3.53029e-18	#REF!	9.67554e-15	109385	5.44968e-21	0.0340142	-8.17452e-20	-0.509936	0.999928		1.3182e-10	5.1492e-13	-1.31233e-10	8.71949e-20	5.44968e-21	-8.17007e-20	-0.509936	1
6–7	6	7		106632	107440	808.286	1.96904e-06	1.60562e-20	0.100215			0.00121623	1.90504e-09	3.17506e-10	1.10791e-33	1.05909e-18	3.32142e-25	8.70798e-16	364615	6.0552e-20	0.377936	0.00104248	2.59297e-09	3.70424e-10	9.49634e-34	1.2356e-18	#REF!	1.18525e-15	312527	4.44872e-20	0.277667	-1.60648e-20	-0.100214	0.999994		6.35704e-11	3.43137e-11	-2.92408e-11	6.0552e-20	4.44872e-20	-1.60561e-20	-0.100214	1
6–8	6	8		106632	107965	1333.17	1.19381e-06	2.64827e-20	0.165292			0.00121623	1.90504e-09	3.17506e-10	1.10791e-33	1.05909e-18	3.32142e-25	8.70798e-16	364615	6.0552e-20	0.377936	0.000912169	3.38673e-09	4.23342e-10	8.3093e-34	1.41212e-18	#REF!	1.54809e-15	273461	3.40605e-20	0.212589	-2.64915e-20	-0.165257	0.999787		6.35704e-11	2.01141e-11	-4.34327e-11	6.0552e-20	3.40605e-20	-2.64771e-20	-0.165257	1
6–9	6	9		106632	108325	1692.84	9.40166e-07	3.36273e-20	0.209885			0.00121623	1.90504e-09	3.17506e-10	1.10791e-33	1.05909e-18	3.32142e-25	8.70798e-16	364615	6.0552e-20	0.377936	0.000810817	4.28634e-09	4.76259e-10	7.38604e-34	1.58863e-18	#REF!	1.9593e-15	243077	2.6912e-20	0.167971	-3.364e-20	-0.20985	0.999832		6.35704e-11	1.25571e-11	-5.09855e-11	6.0552e-20	2.6912e-20	-3.36217e-20	-0.20985	1
6–10	6	10		106632	108582	1950.11	8.16134e-07	3.87378e-20	0.241782			0.00121623	1.90504e-09	3.17506e-10	1.10791e-33	1.05909e-18	3.32142e-25	8.70798e-16	364615	6.0552e-20	0.377936	0.000729735	5.29177e-09	5.29177e-10	6.64744e-34	1.76515e-18	#REF!	2.41888e-15	218769	2.17987e-20	0.136057	-3.87533e-20	-0.241747	0.999854		6.35704e-11	8.23872e-12	-5.53016e-11	6.0552e-20	2.17987e-20	-3.87322e-20	-0.241747	1
6–11	6	11		106632	108773	2140.46	7.43556e-07	4.2519e-20	0.265383			0.00121623	1.90504e-09	3.17506e-10	1.10791e-33	1.05909e-18	3.32142e-25	8.70798e-16	364615	6.0552e-20	0.377936	0.000663396	6.40304e-09	5.82095e-10	6.04313e-34	1.94166e-18	#REF!	2.92685e-15	198881	1.80155e-20	0.112444	-4.25365e-20	-0.265348	0.999867		6.35704e-11	5.62716e-12	-5.79117e-11	6.0552e-20	1.80155e-20	-4.25134e-20	-0.265348	1
6–12	6	12		106632	108917	2285.24	6.96449e-07	4.53949e-20	0.283333			0.00121623	1.90504e-09	3.17506e-10	1.10791e-33	1.05909e-18	3.32142e-25	8.70798e-16	364615	6.0552e-20	0.377936	0.000608113	7.62015e-09	6.35013e-10	5.53953e-34	2.11817e-18	#REF!	3.48319e-15	182308	1.5138e-20	0.0944839	-4.5414e-20	-0.283298	0.999875		6.35704e-11	3.97315e-12	-5.95648e-11	6.0552e-20	1.5138e-20	-4.53893e-20	-0.283298	1
6–13	6	13		106632	109030	2397.9	6.63725e-07	4.76331e-20	0.297302			0.00121623	1.90504e-09	3.17506e-10	1.10791e-33	1.05909e-18	3.32142e-25	8.70798e-16	364615	6.0552e-20	0.377936	0.000561335	8.94309e-09	6.8793e-10	5.11341e-34	2.29469e-18	#REF!	4.08791e-15	168284	1.28986e-20	0.080507	-4.76533e-20	-0.297267	0.999881		6.35704e-11	2.88461e-12	-6.06528e-11	6.0552e-20	1.28987e-20	-4.76274e-20	-0.297267	1
6–14	6	14		106632	109119	2487.31	6.39869e-07	4.94089e-20	0.308386			0.00121623	1.90504e-09	3.17506e-10	1.10791e-33	1.05909e-18	3.32142e-25	8.70798e-16	364615	6.0552e-20	0.377936	0.000521239	1.03719e-08	7.40848e-10	4.74817e-34	2.4712e-18	#REF!	4.74101e-15	156264	1.11218e-20	0.0694168	-4.94302e-20	-0.308351	0.999885		6.35704e-11	2.14461e-12	-6.13924e-11	6.0552e-20	1.11218e-20	-4.94033e-20	-0.308351	1
6–15	6	15		106632	109192	2559.43	6.21838e-07	5.08417e-20	0.317329			0.00121623	1.90504e-09	3.17506e-10	1.10791e-33	1.05909e-18	3.32142e-25	8.70798e-16	364615	6.0552e-20	0.377936	0.00048649	1.19065e-08	7.93766e-10	4.43163e-34	2.64772e-18	#REF!	5.44249e-15	145846	9.68832e-21	0.0604697	-5.08637e-20	-0.317293	0.999888		6.35704e-11	1.6274e-12	-6.19093e-11	6.0552e-20	9.68832e-21	-5.0836e-20	-0.317293	1
6–16	6	16		106632	109251	2618.46	6.0782e-07	5.20142e-20	0.324647			0.00121623	1.90504e-09	3.17506e-10	1.10791e-33	1.05909e-18	3.32142e-25	8.70798e-16	364615	6.0552e-20	0.377936	0.000456085	1.35469e-08	8.46684e-10	4.15465e-34	2.82423e-18	#REF!	6.19234e-15	136731	8.51512e-21	0.0531472	-5.20369e-20	-0.324612	0.999891		6.35704e-11	1.25713e-12	-6.22794e-11	6.0552e-20	8.51513e-21	-5.20086e-20	-0.324612	1
6–17	6	17		106632	109300	2667.38	5.96672e-07	5.2986e-20	0.330713			0.00121623	1.90504e-09	3.17506e-10	1.10791e-33	1.05909e-18	3.32142e-25	8.70798e-16	364615	6.0552e-20	0.377936	0.000429256	1.52932e-08	8.99601e-10	3.91026e-34	3.00075e-18	#REF!	6.99058e-15	128688	7.54281e-21	0.0470785	-5.30092e-20	-0.330677	0.999893		6.35704e-11	9.86426e-13	-6.25499e-11	6.0552e-20	7.54281e-21	-5.29804e-20	-0.330677	1
6–18	6	18		106632	109341	2708.37	5.8764e-07	5.38004e-20	0.335795			0.00121623	1.90504e-09	3.17506e-10	1.10791e-33	1.05909e-18	3.32142e-25	8.70798e-16	364615	6.0552e-20	0.377936	0.000405408	1.71453e-08	9.52519e-10	3.69302e-34	3.17726e-18	#REF!	7.83719e-15	121538	6.728e-21	0.0419929	-5.3824e-20	-0.33576	0.999895		6.35704e-11	7.8482e-13	-6.27514e-11	6.0552e-20	6.728e-21	-5.37947e-20	-0.33576	1
6–19	6	19		106632	109375	2743.07	5.80208e-07	5.44896e-20	0.340097			0.00121623	1.90504e-09	3.17506e-10	1.10791e-33	1.05909e-18	3.32142e-25	8.70798e-16	364615	6.0552e-20	0.377936	0.000384071	1.91033e-08	1.00544e-09	3.49865e-34	3.35378e-18	#REF!	8.73217e-15	115142	6.03843e-21	0.0376889	-5.45136e-20	-0.340062	0.999896		6.35704e-11	6.32187e-13	-6.2904e-11	6.0552e-20	6.03843e-21	-5.44839e-20	-0.340062	1
6–20	6	20		106632	109405	2772.69	5.74009e-07	5.5078e-20	0.34377			0.00121623	1.90504e-09	3.17506e-10	1.10791e-33	1.05909e-18	3.32142e-25	8.70798e-16	364615	6.0552e-20	0.377936	0.000364868	2.11671e-08	1.05835e-09	3.32372e-34	3.53029e-18	#REF!	9.67554e-15	109385	5.44968e-21	0.0340142	-5.51023e-20	-0.343734	0.999897		6.35704e-11	5.1492e-13	-6.30212e-11	6.0552e-20	5.44968e-21	-5.50723e-20	-0.343735	1
7–8	7	8		107440	107965	524.885	3.03219e-06	1.04266e-20	0.0650774			0.00104248	2.59297e-09	3.70424e-10	9.49634e-34	1.2356e-18	2.84693e-25	1.18525e-15	312527	4.44872e-20	0.277667	0.000912169	3.38673e-09	4.23342e-10	8.3093e-34	1.41212e-18	#REF!	1.54809e-15	273461	3.40605e-20	0.212589	-1.04267e-20	-0.0650428	0.999468		3.43137e-11	2.01141e-11	-1.41919e-11	4.44872e-20	3.40605e-20	-1.0421e-20	-0.0650428	1
7–9	7	9		107440	108325	884.554	1.79927e-06	1.75712e-20	0.109671			0.00104248	2.59297e-09	3.70424e-10	9.49634e-34	1.2356e-18	2.84693e-25	1.18525e-15	312527	4.44872e-20	0.277667	0.000810817	4.28634e-09	4.76259e-10	7.38604e-34	1.58863e-18	#REF!	1.9593e-15	243077	2.6912e-20	0.167971	-1.75752e-20	-0.109636	0.999683		3.43137e-11	1.25571e-11	-2.17448e-11	4.44872e-20	2.6912e-20	-1.75656e-20	-0.109636	1
7–10	7	10		107440	108582	1141.82	1.39387e-06	2.26817e-20	0.141568			0.00104248	2.59297e-09	3.70424e-10	9.49634e-34	1.2356e-18	2.84693e-25	1.18525e-15	312527	4.44872e-20	0.277667	0.000729735	5.29177e-09	5.29177e-10	6.64744e-34	1.76515e-18	#REF!	2.41888e-15	218769	2.17987e-20	0.136057	-2.26885e-20	-0.141533	0.999754		3.43137e-11	8.23872e-12	-2.60608e-11	4.44872e-20	2.17987e-20	-2.26761e-20	-0.141533	1
7–11	7	11		107440	108773	1332.17	1.1947e-06	2.64629e-20	0.165168			0.00104248	2.59297e-09	3.70424e-10	9.49634e-34	1.2356e-18	2.84693e-25	1.18525e-15	312527	4.44872e-20	0.277667	0.000663396	6.40304e-09	5.82095e-10	6.04313e-34	1.94166e-18	#REF!	2.92685e-15	198881	1.80155e-20	0.112444	-2.64717e-20	-0.165133	0.99979		3.43137e-11	5.62716e-12	-2.86709e-11	4.44872e-20	1.80155e-20	-2.64573e-20	-0.165134	1
7–12	7	12		107440	108917	1476.95	1.07759e-06	2.93388e-20	0.183118			0.00104248	2.59297e-09	3.70424e-10	9.49634e-34	1.2356e-18	2.84693e-25	1.18525e-15	312527	4.44872e-20	0.277667	0.000608113	7.62015e-09	6.35013e-10	5.53953e-34	2.11817e-18	#REF!	3.48319e-15	182308	1.5138e-20	0.0944839	-2.93492e-20	-0.183083	0.99981		3.43137e-11	3.97315e-12	-3.03241e-11	4.44872e-20	1.5138e-20	-2.93332e-20	-0.183084	1
7–13	7	13		107440	109030	1589.62	1.00121e-06	3.15769e-20	0.197088			0.00104248	2.59297e-09	3.70424e-10	9.49634e-34	1.2356e-18	2.84693e-25	1.18525e-15	312527	4.44872e-20	0.277667	0.000561335	8.94309e-09	6.8793e-10	5.11341e-34	2.29469e-18	#REF!	4.08791e-15	168284	1.28986e-20	0.080507	-3.15885e-20	-0.197053	0.999823		3.43137e-11	2.88461e-12	-3.1412e-11	4.44872e-20	1.28987e-20	-3.15713e-20	-0.197053	1
7–14	7	14		107440	109119	1679.02	9.47904e-07	3.33528e-20	0.208172			0.00104248	2.59297e-09	3.70424e-10	9.49634e-34	1.2356e-18	2.84693e-25	1.18525e-15	312527	4.44872e-20	0.277667	0.000521239	1.03719e-08	7.40848e-10	4.74817e-34	2.4712e-18	#REF!	4.74101e-15	156264	1.11218e-20	0.0694168	-3.33654e-20	-0.208137	0.999832		3.43137e-11	2.14461e-12	-3.21516e-11	4.44872e-20	1.11218e-20	-3.33472e-20	-0.208137	1
7–15	7	15		107440	109192	1751.14	9.08863e-07	3.47855e-20	0.217114			0.00104248	2.59297e-09	3.70424e-10	9.49634e-34	1.2356e-18	2.84693e-25	1.18525e-15	312527	4.44872e-20	0.277667	0.00048649	1.19065e-08	7.93766e-10	4.43163e-34	2.64772e-18	#REF!	5.44249e-15	145846	9.68832e-21	0.0604697	-3.47989e-20	-0.217079	0.99984		3.43137e-11	1.6274e-12	-3.26685e-11	4.44872e-20	9.68832e-21	-3.47799e-20	-0.217079	1
7–16	7	16		107440	109251	1810.17	8.79226e-07	3.59581e-20	0.224433			0.00104248	2.59297e-09	3.70424e-10	9.49634e-34	1.2356e-18	2.84693e-25	1.18525e-15	312527	4.44872e-20	0.277667	0.000456085	1.35469e-08	8.46684e-10	4.15465e-34	2.82423e-18	#REF!	6.19234e-15	136731	8.51512e-21	0.0531472	-3.5972e-20	-0.224398	0.999845		3.43137e-11	1.25713e-12	-3.30386e-11	4.44872e-20	8.51513e-21	-3.59525e-20	-0.224398	1
7–17	7	17		107440	109300	1859.09	8.5609e-07	3.69298e-20	0.230498			0.00104248	2.59297e-09	3.70424e-10	9.49634e-34	1.2356e-18	2.84693e-25	1.18525e-15	312527	4.44872e-20	0.277667	0.000429256	1.52932e-08	8.99601e-10	3.91026e-34	3.00075e-18	#REF!	6.99058e-15	128688	7.54281e-21	0.0470785	-3.69444e-20	-0.230463	0.999849		3.43137e-11	9.86426e-13	-3.33092e-11	4.44872e-20	7.54281e-21	-3.69243e-20	-0.230463	1
7–18	7	18		107440	109341	1900.09	8.37619e-07	3.77442e-20	0.235581			0.00104248	2.59297e-09	3.70424e-10	9.49634e-34	1.2356e-18	2.84693e-25	1.18525e-15	312527	4.44872e-20	0.277667	0.000405408	1.71453e-08	9.52519e-10	3.69302e-34	3.17726e-18	#REF!	7.83719e-15	121538	6.728e-21	0.0419929	-3.77592e-20	-0.235546	0.999852		3.43137e-11	7.8482e-13	-3.35107e-11	4.44872e-20	6.728e-21	-3.77386e-20	-0.235546	1
7–19	7	19		107440	109375	1934.78	8.22598e-07	3.84334e-20	0.239882			0.00104248	2.59297e-09	3.70424e-10	9.49634e-34	1.2356e-18	2.84693e-25	1.18525e-15	312527	4.44872e-20	0.277667	0.000384071	1.91033e-08	1.00544e-09	3.49865e-34	3.35378e-18	#REF!	8.73217e-15	115142	6.03843e-21	0.0376889	-3.84487e-20	-0.239848	0.999855		3.43137e-11	6.32187e-13	-3.36632e-11	4.44872e-20	6.03843e-21	-3.84278e-20	-0.239848	1
7–20	7	20		107440	109405	1964.4	8.10194e-07	3.90218e-20	0.243555			0.00104248	2.59297e-09	3.70424e-10	9.49634e-34	1.2356e-18	2.84693e-25	1.18525e-15	312527	4.44872e-20	0.277667	0.000364868	2.11671e-08	1.05835e-09	3.32372e-34	3.53029e-18	#REF!	9.67554e-15	109385	5.44968e-21	0.0340142	-3.90375e-20	-0.24352	0.999857		3.43137e-11	5.1492e-13	-3.37804e-11	4.44872e-20	5.44968e-21	-3.90163e-20	-0.24352	1
8–9	8	9		107965	108325	359.668	4.42505e-06	7.14461e-21	0.0445931			0.000912169	3.38673e-09	4.23342e-10	8.3093e-34	1.41212e-18	2.49106e-25	1.54809e-15	273461	3.40605e-20	0.212589	0.000810817	4.28634e-09	4.76259e-10	7.38604e-34	1.58863e-18	#REF!	1.9593e-15	243077	2.6912e-20	0.167971	-7.1485e-21	-0.0445931	1		2.01141e-11	1.25571e-11	-7.55284e-12	3.40605e-20	2.6912e-20	-7.14461e-21	-0.0445932	1
8–10	8	10		107965	108582	616.937	2.57976e-06	1.22551e-20	0.0764904			0.000912169	3.38673e-09	4.23342e-10	8.3093e-34	1.41212e-18	2.49106e-25	1.54809e-15	273461	3.40605e-20	0.212589	0.000729735	5.29177e-09	5.29177e-10	6.64744e-34	1.76515e-18	#REF!	2.41888e-15	218769	2.17987e-20	0.136057	-1.22618e-20	-0.0764903	0.999999		2.01141e-11	8.23872e-12	-1.18689e-11	3.40605e-20	2.17987e-20	-1.22551e-20	-0.0764904	1
8–11	8	11		107965	108773	807.286	1.97148e-06	1.60363e-20	0.100091			0.000912169	3.38673e-09	4.23342e-10	8.3093e-34	1.41212e-18	2.49106e-25	1.54809e-15	273461	3.40605e-20	0.212589	0.000663396	6.40304e-09	5.82095e-10	6.04313e-34	1.94166e-18	#REF!	2.92685e-15	198881	1.80155e-20	0.112444	-1.6045e-20	-0.100091	1		2.01141e-11	5.62716e-12	-1.4479e-11	3.40605e-20	1.80155e-20	-1.60363e-20	-0.100091	1
8–12	8	12		107965	108917	952.063	1.67168e-06	1.89122e-20	0.118041			0.000912169	3.38673e-09	4.23342e-10	8.3093e-34	1.41212e-18	2.49106e-25	1.54809e-15	273461	3.40605e-20	0.212589	0.000608113	7.62015e-09	6.35013e-10	5.53953e-34	2.11817e-18	#REF!	3.48319e-15	182308	1.5138e-20	0.0944839	-1.89225e-20	-0.118041	0.999999		2.01141e-11	3.97315e-12	-1.61321e-11	3.40605e-20	1.5138e-20	-1.89122e-20	-0.118041	1
8–13	8	13		107965	109030	1064.73	1.49479e-06	2.11503e-20	0.13201			0.000912169	3.38673e-09	4.23342e-10	8.3093e-34	1.41212e-18	2.49106e-25	1.54809e-15	273461	3.40605e-20	0.212589	0.000561335	8.94309e-09	6.8793e-10	5.11341e-34	2.29469e-18	#REF!	4.08791e-15	168284	1.28986e-20	0.080507	-2.11618e-20	-0.13201	0.999999		2.01141e-11	2.88461e-12	-1.72201e-11	3.40605e-20	1.28987e-20	-2.11503e-20	-0.13201	1
8–14	8	14		107965	109119	1154.13	1.379e-06	2.29262e-20	0.143094			0.000912169	3.38673e-09	4.23342e-10	8.3093e-34	1.41212e-18	2.49106e-25	1.54809e-15	273461	3.40605e-20	0.212589	0.000521239	1.03719e-08	7.40848e-10	4.74817e-34	2.4712e-18	#REF!	4.74101e-15	156264	1.11218e-20	0.0694168	-2.29387e-20	-0.143094	0.999999		2.01141e-11	2.14461e-12	-1.79597e-11	3.40605e-20	1.11218e-20	-2.29262e-20	-0.143094	1
8–15	8	15		107965	109192	1226.26	1.29789e-06	2.43589e-20	0.152036			0.000912169	3.38673e-09	4.23342e-10	8.3093e-34	1.41212e-18	2.49106e-25	1.54809e-15	273461	3.40605e-20	0.212589	0.00048649	1.19065e-08	7.93766e-10	4.43163e-34	2.64772e-18	#REF!	5.44249e-15	145846	9.68832e-21	0.0604697	-2.43722e-20	-0.152036	0.999999		2.01141e-11	1.6274e-12	-1.84766e-11	3.40605e-20	9.68832e-21	-2.43589e-20	-0.152036	1
8–16	8	16		107965	109251	1285.29	1.23829e-06	2.55315e-20	0.159355			0.000912169	3.38673e-09	4.23342e-10	8.3093e-34	1.41212e-18	2.49106e-25	1.54809e-15	273461	3.40605e-20	0.212589	0.000456085	1.35469e-08	8.46684e-10	4.15465e-34	2.82423e-18	#REF!	6.19234e-15	136731	8.51512e-21	0.0531472	-2.55454e-20	-0.159355	0.999999		2.01141e-11	1.25713e-12	-1.88467e-11	3.40605e-20	8.51513e-21	-2.55315e-20	-0.159355	1
8–17	8	17		107965	109300	1334.21	1.19288e-06	2.65033e-20	0.16542			0.000912169	3.38673e-09	4.23342e-10	8.3093e-34	1.41212e-18	2.49106e-25	1.54809e-15	273461	3.40605e-20	0.212589	0.000429256	1.52932e-08	8.99601e-10	3.91026e-34	3.00075e-18	#REF!	6.99058e-15	128688	7.54281e-21	0.0470785	-2.65177e-20	-0.16542	0.999999		2.01141e-11	9.86426e-13	-1.91172e-11	3.40605e-20	7.54281e-21	-2.65033e-20	-0.16542	1
8–18	8	18		107965	109341	1375.2	1.15732e-06	2.73176e-20	0.170503			0.000912169	3.38673e-09	4.23342e-10	8.3093e-34	1.41212e-18	2.49106e-25	1.54809e-15	273461	3.40605e-20	0.212589	0.000405408	1.71453e-08	9.52519e-10	3.69302e-34	3.17726e-18	#REF!	7.83719e-15	121538	6.728e-21	0.0419929	-2.73325e-20	-0.170503	0.999999		2.01141e-11	7.8482e-13	-1.93187e-11	3.40605e-20	6.728e-21	-2.73176e-20	-0.170503	1
8–19	8	19		107965	109375	1409.9	1.12884e-06	2.80068e-20	0.174805			0.000912169	3.38673e-09	4.23342e-10	8.3093e-34	1.41212e-18	2.49106e-25	1.54809e-15	273461	3.40605e-20	0.212589	0.000384071	1.91033e-08	1.00544e-09	3.49865e-34	3.35378e-18	#REF!	8.73217e-15	115142	6.03843e-21	0.0376889	-2.80221e-20	-0.174805	0.999999		2.01141e-11	6.32187e-13	-1.94713e-11	3.40605e-20	6.03843e-21	-2.80068e-20	-0.174805	1
8–20	8	20		107965	109405	1439.52	1.10561e-06	2.85953e-20	0.178478			0.000912169	3.38673e-09	4.23342e-10	8.3093e-34	1.41212e-18	2.49106e-25	1.54809e-15	273461	3.40605e-20	0.212589	0.000364868	2.11671e-08	1.05835e-09	3.32372e-34	3.53029e-18	#REF!	9.67554e-15	109385	5.44968e-21	0.0340142	-2.86108e-20	-0.178477	1		2.01141e-11	5.1492e-13	-1.95885e-11	3.40605e-20	5.44968e-21	-2.85953e-20	-0.178478	1
9–10	9	10		108325	108582	257.269	6.18632e-06	5.11051e-21	0.0318973			0.000810817	4.28634e-09	4.76259e-10	7.38604e-34	1.58863e-18	2.21428e-25	1.9593e-15	243077	2.6912e-20	0.167971	0.000729735	5.29177e-09	5.29177e-10	6.64744e-34	1.76515e-18	#REF!	2.41888e-15	218769	2.17987e-20	0.136057	-5.11328e-21	-0.0318972	0.999998		1.25571e-11	8.23872e-12	-4.31604e-12	2.6912e-20	2.17987e-20	-5.1105e-21	-0.0318972	1
9–11	9	11		108325	108773	447.619	3.55559e-06	8.89171e-21	0.0554977			0.000810817	4.28634e-09	4.76259e-10	7.38604e-34	1.58863e-18	2.21428e-25	1.9593e-15	243077	2.6912e-20	0.167971	0.000663396	6.40304e-09	5.82095e-10	6.04313e-34	1.94166e-18	#REF!	2.92685e-15	198881	1.80155e-20	0.112444	-8.89653e-21	-0.0554975	0.999998		1.25571e-11	5.62716e-12	-6.92619e-12	2.6912e-20	1.80155e-20	-8.89169e-21	-0.0554976	1
9–12	9	12		108325	108917	592.395	2.68664e-06	1.17676e-20	0.0734476			0.000810817	4.28634e-09	4.76259e-10	7.38604e-34	1.58863e-18	2.21428e-25	1.9593e-15	243077	2.6912e-20	0.167971	0.000608113	7.62015e-09	6.35013e-10	5.53953e-34	2.11817e-18	#REF!	3.48319e-15	182308	1.5138e-20	0.0944839	-1.1774e-20	-0.0734475	0.999999		1.25571e-11	3.97315e-12	-8.57929e-12	2.6912e-20	1.5138e-20	-1.17676e-20	-0.0734475	1
9–13	9	13		108325	109030	705.065	2.25731e-06	1.40057e-20	0.0874169			0.000810817	4.28634e-09	4.76259e-10	7.38604e-34	1.58863e-18	2.21428e-25	1.9593e-15	243077	2.6912e-20	0.167971	0.000561335	8.94309e-09	6.8793e-10	5.11341e-34	2.29469e-18	#REF!	4.08791e-15	168284	1.28986e-20	0.080507	-1.40133e-20	-0.0874168	0.999999		1.25571e-11	2.88461e-12	-9.66725e-12	2.6912e-20	1.28987e-20	-1.40057e-20	-0.0874169	1
9–14	9	14		108325	109119	794.466	2.00329e-06	1.57816e-20	0.0985012			0.000810817	4.28634e-09	4.76259e-10	7.38604e-34	1.58863e-18	2.21428e-25	1.9593e-15	243077	2.6912e-20	0.167971	0.000521239	1.03719e-08	7.40848e-10	4.74817e-34	2.4712e-18	#REF!	4.74101e-15	156264	1.11218e-20	0.0694168	-1.57902e-20	-0.098501	0.999998		1.25571e-11	2.14461e-12	-1.04068e-11	2.6912e-20	1.11218e-20	-1.57816e-20	-0.0985011	1
9–15	9	15		108325	109192	866.589	1.83657e-06	1.72143e-20	0.107443			0.000810817	4.28634e-09	4.76259e-10	7.38604e-34	1.58863e-18	2.21428e-25	1.9593e-15	243077	2.6912e-20	0.167971	0.00048649	1.19065e-08	7.93766e-10	4.43163e-34	2.64772e-18	#REF!	5.44249e-15	145846	9.68832e-21	0.0604697	-1.72237e-20	-0.107443	0.999999		1.25571e-11	1.6274e-12	-1.09238e-11	2.6912e-20	9.68832e-21	-1.72143e-20	-0.107443	1
9–16	9	16		108325	109251	925.617	1.71945e-06	1.83869e-20	0.114762			0.000810817	4.28634e-09	4.76259e-10	7.38604e-34	1.58863e-18	2.21428e-25	1.9593e-15	243077	2.6912e-20	0.167971	0.000456085	1.35469e-08	8.46684e-10	4.15465e-34	2.82423e-18	#REF!	6.19234e-15	136731	8.51512e-21	0.0531472	-1.83969e-20	-0.114762	0.999999		1.25571e-11	1.25713e-12	-1.12938e-11	2.6912e-20	8.51513e-21	-1.83869e-20	-0.114762	1
9–17	9	17		108325	109300	974.538	1.63313e-06	1.93587e-20	0.120827			0.000810817	4.28634e-09	4.76259e-10	7.38604e-34	1.58863e-18	2.21428e-25	1.9593e-15	243077	2.6912e-20	0.167971	0.000429256	1.52932e-08	8.99601e-10	3.91026e-34	3.00075e-18	#REF!	6.99058e-15	128688	7.54281e-21	0.0470785	-1.93692e-20	-0.120827	0.999999		1.25571e-11	9.86426e-13	-1.15644e-11	2.6912e-20	7.54281e-21	-1.93587e-20	-0.120827	1
9–18	9	18		108325	109341	1015.53	1.5672e-06	2.0173e-20	0.12591			0.000810817	4.28634e-09	4.76259e-10	7.38604e-34	1.58863e-18	2.21428e-25	1.9593e-15	243077	2.6912e-20	0.167971	0.000405408	1.71453e-08	9.52519e-10	3.69302e-34	3.17726e-18	#REF!	7.83719e-15	121538	6.728e-21	0.0419929	-2.0184e-20	-0.12591	0.999999		1.25571e-11	7.8482e-13	-1.17659e-11	2.6912e-20	6.728e-21	-2.0173e-20	-0.12591	1
9–19	9	19		108325	109375	1050.23	1.51543e-06	2.08622e-20	0.130212			0.000810817	4.28634e-09	4.76259e-10	7.38604e-34	1.58863e-18	2.21428e-25	1.9593e-15	243077	2.6912e-20	0.167971	0.000384071	1.91033e-08	1.00544e-09	3.49865e-34	3.35378e-18	#REF!	8.73217e-15	115142	6.03843e-21	0.0376889	-2.08736e-20	-0.130212	0.999999		1.25571e-11	6.32187e-13	-1.19184e-11	2.6912e-20	6.03843e-21	-2.08622e-20	-0.130212	1
9–20	9	20		108325	109405	1079.85	1.47386e-06	2.14506e-20	0.133884			0.000810817	4.28634e-09	4.76259e-10	7.38604e-34	1.58863e-18	2.21428e-25	1.9593e-15	243077	2.6912e-20	0.167971	0.000364868	2.11671e-08	1.05835e-09	3.32372e-34	3.53029e-18	#REF!	9.67554e-15	109385	5.44968e-21	0.0340142	-2.14623e-20	-0.133884	0.999999		1.25571e-11	5.1492e-13	-1.20356e-11	2.6912e-20	5.44968e-21	-2.14506e-20	-0.133884	1
10–11	10	11		108582	108773	190.35	8.36117e-06	3.7812e-21	0.0236004			0.000729735	5.29177e-09	5.29177e-10	6.64744e-34	1.76515e-18	1.99285e-25	2.41888e-15	218769	2.17987e-20	0.136057	0.000663396	6.40304e-09	5.82095e-10	6.04313e-34	1.94166e-18	#REF!	2.92685e-15	198881	1.80155e-20	0.112444	-3.78325e-21	-0.0236003	0.999998		8.23872e-12	5.62716e-12	-2.61014e-12	2.17987e-20	1.80155e-20	-3.78119e-21	-0.0236003	1
10–12	10	12		108582	108917	335.126	4.74911e-06	6.65709e-21	0.0415503			0.000729735	5.29177e-09	5.29177e-10	6.64744e-34	1.76515e-18	1.99285e-25	2.41888e-15	218769	2.17987e-20	0.136057	0.000608113	7.62015e-09	6.35013e-10	5.53953e-34	2.11817e-18	#REF!	3.48319e-15	182308	1.5138e-20	0.0944839	-6.66072e-21	-0.0415503	1		8.23872e-12	3.97315e-12	-4.26325e-12	2.17987e-20	1.5138e-20	-6.6571e-21	-0.0415503	1
10–13	10	13		108582	109030	447.796	3.55418e-06	8.89522e-21	0.0555196			0.000729735	5.29177e-09	5.29177e-10	6.64744e-34	1.76515e-18	1.99285e-25	2.41888e-15	218769	2.17987e-20	0.136057	0.000561335	8.94309e-09	6.8793e-10	5.11341e-34	2.29469e-18	#REF!	4.08791e-15	168284	1.28986e-20	0.080507	-8.90007e-21	-0.0555196	1		8.23872e-12	2.88461e-12	-5.3512e-12	2.17987e-20	1.28987e-20	-8.89523e-21	-0.0555196	1
10–14	10	14		108582	109119	537.197	2.96269e-06	1.06711e-20	0.0666039			0.000729735	5.29177e-09	5.29177e-10	6.64744e-34	1.76515e-18	1.99285e-25	2.41888e-15	218769	2.17987e-20	0.136057	0.000521239	1.03719e-08	7.40848e-10	4.74817e-34	2.4712e-18	#REF!	4.74101e-15	156264	1.11218e-20	0.0694168	-1.06769e-20	-0.0666038	0.999999		8.23872e-12	2.14461e-12	-6.0908e-12	2.17987e-20	1.11218e-20	-1.06711e-20	-0.0666039	1
10–15	10	15		108582	109192	609.32	2.61201e-06	1.21038e-20	0.075546			0.000729735	5.29177e-09	5.29177e-10	6.64744e-34	1.76515e-18	1.99285e-25	2.41888e-15	218769	2.17987e-20	0.136057	0.00048649	1.19065e-08	7.93766e-10	4.43163e-34	2.64772e-18	#REF!	5.44249e-15	145846	9.68832e-21	0.0604697	-1.21104e-20	-0.075546	1		8.23872e-12	1.6274e-12	-6.60772e-12	2.17987e-20	9.68832e-21	-1.21038e-20	-0.075546	1
10–16	10	16		108582	109251	668.348	2.38132e-06	1.32764e-20	0.0828646			0.000729735	5.29177e-09	5.29177e-10	6.64744e-34	1.76515e-18	1.99285e-25	2.41888e-15	218769	2.17987e-20	0.136057	0.000456085	1.35469e-08	8.46684e-10	4.15465e-34	2.82423e-18	#REF!	6.19234e-15	136731	8.51512e-21	0.0531472	-1.32836e-20	-0.0828645	1		8.23872e-12	1.25713e-12	-6.97779e-12	2.17987e-20	8.51513e-21	-1.32764e-20	-0.0828646	1
10–17	10	17		108582	109300	717.269	2.2189e-06	1.42482e-20	0.08893			0.000729735	5.29177e-09	5.29177e-10	6.64744e-34	1.76515e-18	1.99285e-25	2.41888e-15	218769	2.17987e-20	0.136057	0.000429256	1.52932e-08	8.99601e-10	3.91026e-34	3.00075e-18	#REF!	6.99058e-15	128688	7.54281e-21	0.0470785	-1.42559e-20	-0.0889299	0.999999		8.23872e-12	9.86426e-13	-7.24835e-12	2.17987e-20	7.54281e-21	-1.42482e-20	-0.08893	1
10–18	10	18		108582	109341	758.265	2.09894e-06	1.50625e-20	0.0940128			0.000729735	5.29177e-09	5.29177e-10	6.64744e-34	1.76515e-18	1.99285e-25	2.41888e-15	218769	2.17987e-20	0.136057	0.000405408	1.71453e-08	9.52519e-10	3.69302e-34	3.17726e-18	#REF!	7.83719e-15	121538	6.728e-21	0.0419929	-1.50707e-20	-0.0940128	1		8.23872e-12	7.8482e-13	-7.44985e-12	2.17987e-20	6.728e-21	-1.50625e-20	-0.0940129	1
10–19	10	19		108582	109375	792.96	2.0071e-06	1.57517e-20	0.0983145			0.000729735	5.29177e-09	5.29177e-10	6.64744e-34	1.76515e-18	1.99285e-25	2.41888e-15	218769	2.17987e-20	0.136057	0.000384071	1.91033e-08	1.00544e-09	3.49865e-34	3.35378e-18	#REF!	8.73217e-15	115142	6.03843e-21	0.0376889	-1.57603e-20	-0.0983144	1		8.23872e-12	6.32187e-13	-7.6024e-12	2.17987e-20	6.03843e-21	-1.57517e-20	-0.0983145	1
10–20	10	20		108582	109405	822.582	1.93482e-06	1.63401e-20	0.101987			0.000729735	5.29177e-09	5.29177e-10	6.64744e-34	1.76515e-18	1.99285e-25	2.41888e-15	218769	2.17987e-20	0.136057	0.000364868	2.11671e-08	1.05835e-09	3.32372e-34	3.53029e-18	#REF!	9.67554e-15	109385	5.44968e-21	0.0340142	-1.6349e-20	-0.101987	1		8.23872e-12	5.1492e-13	-7.7196e-12	2.17987e-20	5.44968e-21	-1.63401e-20	-0.101987	1
11–12	11	12		108773	108917	144.776	1.09932e-05	2.8759e-21	0.0179499			0.000663396	6.40304e-09	5.82095e-10	6.04313e-34	1.94166e-18	1.81168e-25	2.92685e-15	198881	1.80155e-20	0.112444	0.000608113	7.62015e-09	6.35013e-10	5.53953e-34	2.11817e-18	#REF!	3.48319e-15	182308	1.5138e-20	0.0944839	-2.87747e-21	-0.01795	1		5.62716e-12	3.97315e-12	-1.65311e-12	1.80155e-20	1.5138e-20	-2.87591e-21	-0.01795	1
11–13	11	13		108773	109030	257.446	6.18207e-06	5.11402e-21	0.0319192			0.000663396	6.40304e-09	5.82095e-10	6.04313e-34	1.94166e-18	1.81168e-25	2.92685e-15	198881	1.80155e-20	0.112444	0.000561335	8.94309e-09	6.8793e-10	5.11341e-34	2.29469e-18	#REF!	4.08791e-15	168284	1.28986e-20	0.080507	-5.11682e-21	-0.0319193	1		5.62716e-12	2.88461e-12	-2.74106e-12	1.80155e-20	1.28987e-20	-5.11404e-21	-0.0319193	1
11–14	11	14		108773	109119	346.847	4.58862e-06	6.88993e-21	0.0430035			0.000663396	6.40304e-09	5.82095e-10	6.04313e-34	1.94166e-18	1.81168e-25	2.92685e-15	198881	1.80155e-20	0.112444	0.000521239	1.03719e-08	7.40848e-10	4.74817e-34	2.4712e-18	#REF!	4.74101e-15	156264	1.11218e-20	0.0694168	-6.89367e-21	-0.0430035	0.999999		5.62716e-12	2.14461e-12	-3.48066e-12	1.80155e-20	1.11218e-20	-6.88992e-21	-0.0430035	1
11–15	11	15		108773	109192	418.97	3.79872e-06	8.32261e-21	0.0519456			0.000663396	6.40304e-09	5.82095e-10	6.04313e-34	1.94166e-18	1.81168e-25	2.92685e-15	198881	1.80155e-20	0.112444	0.00048649	1.19065e-08	7.93766e-10	4.43163e-34	2.64772e-18	#REF!	5.44249e-15	145846	9.68832e-21	0.0604697	-8.32715e-21	-0.0519457	1		5.62716e-12	1.6274e-12	-3.99758e-12	1.80155e-20	9.68832e-21	-8.32262e-21	-0.0519457	1
11–16	11	16		108773	109251	477.998	3.32962e-06	9.49517e-21	0.0592642			0.000663396	6.40304e-09	5.82095e-10	6.04313e-34	1.94166e-18	1.81168e-25	2.92685e-15	198881	1.80155e-20	0.112444	0.000456085	1.35469e-08	8.46684e-10	4.15465e-34	2.82423e-18	#REF!	6.19234e-15	136731	8.51512e-21	0.0531472	-9.50034e-21	-0.0592642	1		5.62716e-12	1.25713e-12	-4.36765e-12	1.80155e-20	8.51513e-21	-9.49518e-21	-0.0592642	1
11–17	11	17		108773	109300	526.919	3.02048e-06	1.0467e-20	0.0653296			0.000663396	6.40304e-09	5.82095e-10	6.04313e-34	1.94166e-18	1.81168e-25	2.92685e-15	198881	1.80155e-20	0.112444	0.000429256	1.52932e-08	8.99601e-10	3.91026e-34	3.00075e-18	#REF!	6.99058e-15	128688	7.54281e-21	0.0470785	-1.04727e-20	-0.0653296	1		5.62716e-12	9.86426e-13	-4.63821e-12	1.80155e-20	7.54281e-21	-1.0467e-20	-0.0653296	1
11–18	11	18		108773	109341	567.915	2.80244e-06	1.12813e-20	0.0704125			0.000663396	6.40304e-09	5.82095e-10	6.04313e-34	1.94166e-18	1.81168e-25	2.92685e-15	198881	1.80155e-20	0.112444	0.000405408	1.71453e-08	9.52519e-10	3.69302e-34	3.17726e-18	#REF!	7.83719e-15	121538	6.728e-21	0.0419929	-1.12875e-20	-0.0704125	1		5.62716e-12	7.8482e-13	-4.8397e-12	1.80155e-20	6.728e-21	-1.12813e-20	-0.0704125	1
11–19	11	19		108773	109375	602.61	2.64109e-06	1.19705e-20	0.0747141			0.000663396	6.40304e-09	5.82095e-10	6.04313e-34	1.94166e-18	1.81168e-25	2.92685e-15	198881	1.80155e-20	0.112444	0.000384071	1.91033e-08	1.00544e-09	3.49865e-34	3.35378e-18	#REF!	8.73217e-15	115142	6.03843e-21	0.0376889	-1.1977e-20	-0.0747141	1		5.62716e-12	6.32187e-13	-4.99225e-12	1.80155e-20	6.03843e-21	-1.19705e-20	-0.0747142	1
11–20	11	20		108773	109405	632.233	2.51735e-06	1.2559e-20	0.0783869			0.000663396	6.40304e-09	5.82095e-10	6.04313e-34	1.94166e-18	1.81168e-25	2.92685e-15	198881	1.80155e-20	0.112444	0.000364868	2.11671e-08	1.05835e-09	3.32372e-34	3.53029e-18	#REF!	9.67554e-15	109385	5.44968e-21	0.0340142	-1.25658e-20	-0.0783868	0.999999		5.62716e-12	5.1492e-13	-5.10946e-12	1.80155e-20	5.44968e-21	-1.2559e-20	-0.0783868	1
12–13	12	13		108917	109030	112.67	1.41258e-05	2.23813e-21	0.0139693			0.000608113	7.62015e-09	6.35013e-10	5.53953e-34	2.11817e-18	1.66071e-25	3.48319e-15	182308	1.5138e-20	0.0944839	0.000561335	8.94309e-09	6.8793e-10	5.11341e-34	2.29469e-18	#REF!	4.08791e-15	168284	1.28986e-20	0.080507	-2.23935e-21	-0.0139693	1		3.97315e-12	2.88461e-12	-1.08795e-12	1.5138e-20	1.28987e-20	-2.23813e-21	-0.0139693	1
12–14	12	14		108917	109119	202.071	7.87619e-06	4.01403e-21	0.0250536			0.000608113	7.62015e-09	6.35013e-10	5.53953e-34	2.11817e-18	1.66071e-25	3.48319e-15	182308	1.5138e-20	0.0944839	0.000521239	1.03719e-08	7.40848e-10	4.74817e-34	2.4712e-18	#REF!	4.74101e-15	156264	1.11218e-20	0.0694168	-4.0162e-21	-0.0250535	0.999997		3.97315e-12	2.14461e-12	-1.82755e-12	1.5138e-20	1.11218e-20	-4.01402e-21	-0.0250535	1
12–15	12	15		108917	109192	274.194	5.80446e-06	5.44671e-21	0.0339957			0.000608113	7.62015e-09	6.35013e-10	5.53953e-34	2.11817e-18	1.66071e-25	3.48319e-15	182308	1.5138e-20	0.0944839	0.00048649	1.19065e-08	7.93766e-10	4.43163e-34	2.64772e-18	#REF!	5.44249e-15	145846	9.68832e-21	0.0604697	-5.44968e-21	-0.0339957	1		3.97315e-12	1.6274e-12	-2.34447e-12	1.5138e-20	9.68832e-21	-5.44672e-21	-0.0339957	1
12–16	12	16		108917	109251	333.222	4.77624e-06	6.61927e-21	0.0413142			0.000608113	7.62015e-09	6.35013e-10	5.53953e-34	2.11817e-18	1.66071e-25	3.48319e-15	182308	1.5138e-20	0.0944839	0.000456085	1.35469e-08	8.46684e-10	4.15465e-34	2.82423e-18	#REF!	6.19234e-15	136731	8.51512e-21	0.0531472	-6.62287e-21	-0.0413142	0.999999		3.97315e-12	1.25713e-12	-2.71454e-12	1.5138e-20	8.51513e-21	-6.61927e-21	-0.0413142	1
12–17	12	17		108917	109300	382.143	4.1648e-06	7.59106e-21	0.0473797			0.000608113	7.62015e-09	6.35013e-10	5.53953e-34	2.11817e-18	1.66071e-25	3.48319e-15	182308	1.5138e-20	0.0944839	0.000429256	1.52932e-08	8.99601e-10	3.91026e-34	3.00075e-18	#REF!	6.99058e-15	128688	7.54281e-21	0.0470785	-7.59519e-21	-0.0473796	0.999999		3.97315e-12	9.86426e-13	-2.9851e-12	1.5138e-20	7.54281e-21	-7.59106e-21	-0.0473797	1
12–18	12	18		108917	109341	423.139	3.76129e-06	8.40542e-21	0.0524625			0.000608113	7.62015e-09	6.35013e-10	5.53953e-34	2.11817e-18	1.66071e-25	3.48319e-15	182308	1.5138e-20	0.0944839	0.000405408	1.71453e-08	9.52519e-10	3.69302e-34	3.17726e-18	#REF!	7.83719e-15	121538	6.728e-21	0.0419929	-8.41e-21	-0.0524625	1		3.97315e-12	7.8482e-13	-3.1866e-12	1.5138e-20	6.728e-21	-8.40542e-21	-0.0524625	1
12–19	12	19		108917	109375	457.834	3.47626e-06	9.09462e-21	0.0567642			0.000608113	7.62015e-09	6.35013e-10	5.53953e-34	2.11817e-18	1.66071e-25	3.48319e-15	182308	1.5138e-20	0.0944839	0.000384071	1.91033e-08	1.00544e-09	3.49865e-34	3.35378e-18	#REF!	8.73217e-15	115142	6.03843e-21	0.0376889	-9.09957e-21	-0.0567641	1		3.97315e-12	6.32187e-13	-3.33914e-12	1.5138e-20	6.03843e-21	-9.09462e-21	-0.0567642	1
12–20	12	20		108917	109405	487.457	3.265e-06	9.68307e-21	0.0604369			0.000608113	7.62015e-09	6.35013e-10	5.53953e-34	2.11817e-18	1.66071e-25	3.48319e-15	182308	1.5138e-20	0.0944839	0.000364868	2.11671e-08	1.05835e-09	3.32372e-34	3.53029e-18	#REF!	9.67554e-15	109385	5.44968e-21	0.0340142	-9.68832e-21	-0.0604368	0.999998		3.97315e-12	5.1492e-13	-3.45635e-12	1.5138e-20	5.44968e-21	-9.68305e-21	-0.0604368	1
13–14	13	14		109030	109119	89.4	1.78026e-05	1.77588e-21	0.0110842			0.000561335	8.94309e-09	6.8793e-10	5.11341e-34	2.29469e-18	1.53296e-25	4.08791e-15	168284	1.28986e-20	0.080507	0.000521239	1.03719e-08	7.40848e-10	4.74817e-34	2.4712e-18	#REF!	4.74101e-15	156264	1.11218e-20	0.0694168	-1.77685e-21	-0.0110842	1		2.88461e-12	2.14461e-12	-7.39596e-13	1.28987e-20	1.11218e-20	-1.77589e-21	-0.0110842	1
13–15	13	15		109030	109192	161.523	9.85339e-06	3.20857e-21	0.0200263			0.000561335	8.94309e-09	6.8793e-10	5.11341e-34	2.29469e-18	1.53296e-25	4.08791e-15	168284	1.28986e-20	0.080507	0.00048649	1.19065e-08	7.93766e-10	4.43163e-34	2.64772e-18	#REF!	5.44249e-15	145846	9.68832e-21	0.0604697	-3.21033e-21	-0.0200264	1.00001		2.88461e-12	1.6274e-12	-1.25652e-12	1.28987e-20	9.68832e-21	-3.20858e-21	-0.0200264	1
13–16	13	16		109030	109251	220.551	7.21624e-06	4.38112e-21	0.0273448			0.000561335	8.94309e-09	6.8793e-10	5.11341e-34	2.29469e-18	1.53296e-25	4.08791e-15	168284	1.28986e-20	0.080507	0.000456085	1.35469e-08	8.46684e-10	4.15465e-34	2.82423e-18	#REF!	6.19234e-15	136731	8.51512e-21	0.0531472	-4.38352e-21	-0.0273449	1		2.88461e-12	1.25713e-12	-1.62659e-12	1.28987e-20	8.51513e-21	-4.38114e-21	-0.0273449	1
13–17	13	17		109030	109300	269.472	5.90618e-06	5.35291e-21	0.0334103			0.000561335	8.94309e-09	6.8793e-10	5.11341e-34	2.29469e-18	1.53296e-25	4.08791e-15	168284	1.28986e-20	0.080507	0.000429256	1.52932e-08	8.99601e-10	3.91026e-34	3.00075e-18	#REF!	6.99058e-15	128688	7.54281e-21	0.0470785	-5.35584e-21	-0.0334103	1		2.88461e-12	9.86426e-13	-1.89715e-12	1.28987e-20	7.54281e-21	-5.35293e-21	-0.0334103	1
13–18	13	18		109030	109341	310.468	5.12629e-06	6.16728e-21	0.0384931			0.000561335	8.94309e-09	6.8793e-10	5.11341e-34	2.29469e-18	1.53296e-25	4.08791e-15	168284	1.28986e-20	0.080507	0.000405408	1.71453e-08	9.52519e-10	3.69302e-34	3.17726e-18	#REF!	7.83719e-15	121538	6.728e-21	0.0419929	-6.17065e-21	-0.0384932	1		2.88461e-12	7.8482e-13	-2.09864e-12	1.28987e-20	6.728e-21	-6.16729e-21	-0.0384932	1
13–19	13	19		109030	109375	345.163	4.61101e-06	6.85647e-21	0.0427947			0.000561335	8.94309e-09	6.8793e-10	5.11341e-34	2.29469e-18	1.53296e-25	4.08791e-15	168284	1.28986e-20	0.080507	0.000384071	1.91033e-08	1.00544e-09	3.49865e-34	3.35378e-18	#REF!	8.73217e-15	115142	6.03843e-21	0.0376889	-6.86022e-21	-0.0427948	1		2.88461e-12	6.32187e-13	-2.25119e-12	1.28987e-20	6.03843e-21	-6.85649e-21	-0.0427949	1
13–20	13	20		109030	109405	374.786	4.24656e-06	7.44492e-21	0.0464675			0.000561335	8.94309e-09	6.8793e-10	5.11341e-34	2.29469e-18	1.53296e-25	4.08791e-15	168284	1.28986e-20	0.080507	0.000364868	2.11671e-08	1.05835e-09	3.32372e-34	3.53029e-18	#REF!	9.67554e-15	109385	5.44968e-21	0.0340142	-7.44897e-21	-0.0464675	1		2.88461e-12	5.1492e-13	-2.3684e-12	1.28987e-20	5.44968e-21	-7.44492e-21	-0.0464675	1
14–15	14	15		109119	109192	72.123	2.20672e-05	1.43268e-21	0.00894211			0.000521239	1.03719e-08	7.40848e-10	4.74817e-34	2.4712e-18	1.42347e-25	4.74101e-15	156264	1.11218e-20	0.0694168	0.00048649	1.19065e-08	7.93766e-10	4.43163e-34	2.64772e-18	#REF!	5.44249e-15	145846	9.68832e-21	0.0604697	-1.43348e-21	-0.00894218	1.00001		2.14461e-12	1.6274e-12	-5.16924e-13	1.11218e-20	9.68832e-21	-1.4327e-21	-0.00894219	1
14–16	14	16		109119	109251	131.151	1.21352e-05	2.60524e-21	0.0162606			0.000521239	1.03719e-08	7.40848e-10	4.74817e-34	2.4712e-18	1.42347e-25	4.74101e-15	156264	1.11218e-20	0.0694168	0.000456085	1.35469e-08	8.46684e-10	4.15465e-34	2.82423e-18	#REF!	6.19234e-15	136731	8.51512e-21	0.0531472	-2.60667e-21	-0.0162607	1		2.14461e-12	1.25713e-12	-8.86995e-13	1.11218e-20	8.51513e-21	-2.60525e-21	-0.0162607	1
14–17	14	17		109119	109300	180.072	8.83841e-06	3.57703e-21	0.0223261			0.000521239	1.03719e-08	7.40848e-10	4.74817e-34	2.4712e-18	1.42347e-25	4.74101e-15	156264	1.11218e-20	0.0694168	0.000429256	1.52932e-08	8.99601e-10	3.91026e-34	3.00075e-18	#REF!	6.99058e-15	128688	7.54281e-21	0.0470785	-3.57899e-21	-0.0223261	1		2.14461e-12	9.86426e-13	-1.15755e-12	1.11218e-20	7.54281e-21	-3.57704e-21	-0.0223261	1
14–18	14	18		109119	109341	221.068	7.19937e-06	4.39139e-21	0.0274089			0.000521239	1.03719e-08	7.40848e-10	4.74817e-34	2.4712e-18	1.42347e-25	4.74101e-15	156264	1.11218e-20	0.0694168	0.000405408	1.71453e-08	9.52519e-10	3.69302e-34	3.17726e-18	#REF!	7.83719e-15	121538	6.728e-21	0.0419929	-4.39379e-21	-0.027409	1		2.14461e-12	7.8482e-13	-1.35905e-12	1.11218e-20	6.728e-21	-4.39141e-21	-0.027409	1
14–19	14	19		109119	109375	255.763	6.22275e-06	5.08059e-21	0.0317106			0.000521239	1.03719e-08	7.40848e-10	4.74817e-34	2.4712e-18	1.42347e-25	4.74101e-15	156264	1.11218e-20	0.0694168	0.000384071	1.91033e-08	1.00544e-09	3.49865e-34	3.35378e-18	#REF!	8.73217e-15	115142	6.03843e-21	0.0376889	-5.08337e-21	-0.0317106	1		2.14461e-12	6.32187e-13	-1.5116e-12	1.11218e-20	6.03843e-21	-5.0806e-21	-0.0317106	1
14–20	14	20		109119	109405	285.386	5.57683e-06	5.66904e-21	0.0353833			0.000521239	1.03719e-08	7.40848e-10	4.74817e-34	2.4712e-18	1.42347e-25	4.74101e-15	156264	1.11218e-20	0.0694168	0.000364868	2.11671e-08	1.05835e-09	3.32372e-34	3.53029e-18	#REF!	9.67554e-15	109385	5.44968e-21	0.0340142	-5.67211e-21	-0.0353833	0.999998		2.14461e-12	5.1492e-13	-1.6288e-12	1.11218e-20	5.44968e-21	-5.66903e-21	-0.0353833	1
15–16	15	16		109192	109251	59.028	2.69626e-05	1.17256e-21	0.00731854			0.00048649	1.19065e-08	7.93766e-10	4.43163e-34	2.64772e-18	1.32857e-25	5.44249e-15	145846	9.68832e-21	0.0604697	0.000456085	1.35469e-08	8.46684e-10	4.15465e-34	2.82423e-18	#REF!	6.19234e-15	136731	8.51512e-21	0.0531472	-1.17319e-21	-0.00731852	0.999998		1.6274e-12	1.25713e-12	-3.70071e-13	9.68832e-21	8.51513e-21	-1.17256e-21	-0.00731852	1
15–17	15	17		109192	109300	107.949	1.47435e-05	2.14435e-21	0.013384			0.00048649	1.19065e-08	7.93766e-10	4.43163e-34	2.64772e-18	1.32857e-25	5.44249e-15	145846	9.68832e-21	0.0604697	0.000429256	1.52932e-08	8.99601e-10	3.91026e-34	3.00075e-18	#REF!	6.99058e-15	128688	7.54281e-21	0.0470785	-2.14551e-21	-0.0133839	0.999997		1.6274e-12	9.86426e-13	-6.40628e-13	9.68832e-21	7.54281e-21	-2.14434e-21	-0.0133839	1
15–18	15	18		109192	109341	148.945	1.06855e-05	2.95871e-21	0.0184668			0.00048649	1.19065e-08	7.93766e-10	4.43163e-34	2.64772e-18	1.32857e-25	5.44249e-15	145846	9.68832e-21	0.0604697	0.000405408	1.71453e-08	9.52519e-10	3.69302e-34	3.17726e-18	#REF!	7.83719e-15	121538	6.728e-21	0.0419929	-2.96032e-21	-0.0184668	0.999999		1.6274e-12	7.8482e-13	-8.42124e-13	9.68832e-21	6.728e-21	-2.95871e-21	-0.0184668	1
15–19	15	19		109192	109375	183.64	8.66668e-06	3.64791e-21	0.0227684			0.00048649	1.19065e-08	7.93766e-10	4.43163e-34	2.64772e-18	1.32857e-25	5.44249e-15	145846	9.68832e-21	0.0604697	0.000384071	1.91033e-08	1.00544e-09	3.49865e-34	3.35378e-18	#REF!	8.73217e-15	115142	6.03843e-21	0.0376889	-3.64989e-21	-0.0227684	0.999999		1.6274e-12	6.32187e-13	-9.94674e-13	9.68832e-21	6.03843e-21	-3.64791e-21	-0.0227684	1
15–20	15	20		109192	109405	213.263	7.46285e-06	4.23635e-21	0.0264412			0.00048649	1.19065e-08	7.93766e-10	4.43163e-34	2.64772e-18	1.32857e-25	5.44249e-15	145846	9.68832e-21	0.0604697	0.000364868	2.11671e-08	1.05835e-09	3.32372e-34	3.53029e-18	#REF!	9.67554e-15	109385	5.44968e-21	0.0340142	-4.23864e-21	-0.0264411	0.999995		1.6274e-12	5.1492e-13	-1.11188e-12	9.68832e-21	5.44968e-21	-4.23633e-21	-0.0264411	1
16–17	16	17		109251	109300	48.921	3.25331e-05	9.71789e-22	0.00606543			0.000456085	1.35469e-08	8.46684e-10	4.15465e-34	2.82423e-18	1.24553e-25	6.19234e-15	136731	8.51512e-21	0.0531472	0.000429256	1.52932e-08	8.99601e-10	3.91026e-34	3.00075e-18	#REF!	6.99058e-15	128688	7.54281e-21	0.0470785	-9.72315e-22	-0.00606541	0.999997		1.25713e-12	9.86426e-13	-2.70557e-13	8.51513e-21	7.54281e-21	-9.71786e-22	-0.00606541	1
16–18	16	18		109251	109341	89.917	1.77002e-05	1.78615e-21	0.0111483			0.000456085	1.35469e-08	8.46684e-10	4.15465e-34	2.82423e-18	1.24553e-25	6.19234e-15	136731	8.51512e-21	0.0531472	0.000405408	1.71453e-08	9.52519e-10	3.69302e-34	3.17726e-18	#REF!	7.83719e-15	121538	6.728e-21	0.0419929	-1.78712e-21	-0.0111483	1		1.25713e-12	7.8482e-13	-4.72053e-13	8.51513e-21	6.728e-21	-1.78615e-21	-0.0111483	1
16–19	16	19		109251	109375	124.612	1.2772e-05	2.47535e-21	0.0154499			0.000456085	1.35469e-08	8.46684e-10	4.15465e-34	2.82423e-18	1.24553e-25	6.19234e-15	136731	8.51512e-21	0.0531472	0.000384071	1.91033e-08	1.00544e-09	3.49865e-34	3.35378e-18	#REF!	8.73217e-15	115142	6.03843e-21	0.0376889	-2.4767e-21	-0.0154499	1		1.25713e-12	6.32187e-13	-6.24602e-13	8.51513e-21	6.03843e-21	-2.47535e-21	-0.0154499	1
16–20	16	20		109251	109405	154.235	1.0319e-05	3.06379e-21	0.0191227			0.000456085	1.35469e-08	8.46684e-10	4.15465e-34	2.82423e-18	1.24553e-25	6.19234e-15	136731	8.51512e-21	0.0531472	0.000364868	2.11671e-08	1.05835e-09	3.32372e-34	3.53029e-18	#REF!	9.67554e-15	109385	5.44968e-21	0.0340142	-3.06544e-21	-0.0191226	0.999994		1.25713e-12	5.1492e-13	-7.41805e-13	8.51513e-21	5.44968e-21	-3.06378e-21	-0.0191226	1
17–18	17	18		109300	109341	40.996	3.88221e-05	8.14363e-22	0.00508285			0.000429256	1.52932e-08	8.99601e-10	3.91026e-34	3.00075e-18	1.17227e-25	6.99058e-15	128688	7.54281e-21	0.0470785	0.000405408	1.71453e-08	9.52519e-10	3.69302e-34	3.17726e-18	#REF!	7.83719e-15	121538	6.728e-21	0.0419929	-8.14809e-22	-0.00508287	1		9.86426e-13	7.8482e-13	-2.01496e-13	7.54281e-21	6.728e-21	-8.14366e-22	-0.00508288	1
17–19	17	19		109300	109375	75.691	2.10269e-05	1.50356e-21	0.00938448			0.000429256	1.52932e-08	8.99601e-10	3.91026e-34	3.00075e-18	1.17227e-25	6.99058e-15	128688	7.54281e-21	0.0470785	0.000384071	1.91033e-08	1.00544e-09	3.49865e-34	3.35378e-18	#REF!	8.73217e-15	115142	6.03843e-21	0.0376889	-1.50438e-21	-0.00938451	1		9.86426e-13	6.32187e-13	-3.54046e-13	7.54281e-21	6.03843e-21	-1.50356e-21	-0.00938451	1
17–20	17	20		109300	109405	105.314	1.51124e-05	2.092e-21	0.0130573			0.000429256	1.52932e-08	8.99601e-10	3.91026e-34	3.00075e-18	1.17227e-25	6.99058e-15	128688	7.54281e-21	0.0470785	0.000364868	2.11671e-08	1.05835e-09	3.32372e-34	3.53029e-18	#REF!	9.67554e-15	109385	5.44968e-21	0.0340142	-2.09313e-21	-0.0130572	0.999993		9.86426e-13	5.1492e-13	-4.71249e-13	7.54281e-21	5.44968e-21	-2.09199e-21	-0.0130572	1
18–19	18	19		109341	109375	34.695	4.58726e-05	6.89197e-22	0.00430163			0.000405408	1.71453e-08	9.52519e-10	3.69302e-34	3.17726e-18	1.10714e-25	7.83719e-15	121538	6.728e-21	0.0419929	0.000384071	1.91033e-08	1.00544e-09	3.49865e-34	3.35378e-18	#REF!	8.73217e-15	115142	6.03843e-21	0.0376889	-6.89573e-22	-0.00430163	1		7.8482e-13	6.32187e-13	-1.5255e-13	6.728e-21	6.03843e-21	-6.89198e-22	-0.00430164	1
18–20	18	20		109341	109405	64.318	2.4745e-05	1.27764e-21	0.00797441			0.000405408	1.71453e-08	9.52519e-10	3.69302e-34	3.17726e-18	1.10714e-25	7.83719e-15	121538	6.728e-21	0.0419929	0.000364868	2.11671e-08	1.05835e-09	3.32372e-34	3.53029e-18	#REF!	9.67554e-15	109385	5.44968e-21	0.0340142	-1.27832e-21	-0.0079743	0.999986		7.8482e-13	5.1492e-13	-2.69753e-13	6.728e-21	5.44968e-21	-1.27762e-21	-0.00797431	1
19–20	19	20		109375	109405	29.623	5.37268e-05	5.88445e-22	0.00367278			0.000384071	1.91033e-08	1.00544e-09	3.49865e-34	3.35378e-18	1.04887e-25	8.73217e-15	115142	6.03843e-21	0.0376889	0.000364868	2.11671e-08	1.05835e-09	3.32372e-34	3.53029e-18	#REF!	9.67554e-15	109385	5.44968e-21	0.0340142	-5.88746e-22	-0.00367267	0.999968		6.32187e-13	5.1492e-13	-1.17203e-13	6.03843e-21	5.44968e-21	-5.88426e-22	-0.00367267	1
