# Supplementary material for: On the Fundamental Constants of Nature
Source: Preprints.org preprint supplement (doi:10.20944/preprints202006.0017.v2), 2020-09-14
Supplement: Supplementary file 2 [file supplementary]

$\hbar=l_p m_p c$

$G=\frac{l_p}{m_p} c^2$

Traditional formula

NEW FOUNDATIONS MODEL

| Maximum Potential | Proportionality Operators |  |  | Natural Formula |
|-------------------|---------------------------|--|--|-----------------|
|-------------------|---------------------------|--|--|-----------------|

| <i>length</i> | <i>mass</i> | <i>time</i> | $\frac{\Delta x}{\Delta t}$ |
|---------------|-------------|-------------|-----------------------------|
|---------------|-------------|-------------|-----------------------------|

Mechanics

|                       |                                      |       |                       |                   |               |                                                       |
|-----------------------|--------------------------------------|-------|-----------------------|-------------------|---------------|-------------------------------------------------------|
| Photon momentum       | $p_\gamma = \frac{\hbar}{\lambda}$   | $p_p$ | $\frac{l_p}{\lambda}$ |                   |               | $p=p_p \frac{l_p}{\lambda}$                           |
| Photon energy         | $E_\gamma = \frac{\hbar c}{\lambda}$ | $E_p$ | $\frac{l_p}{\lambda}$ |                   |               | $E=E_p \frac{l_p}{\lambda}$                           |
| Compton wavelength    | $\lambda_c = \frac{\hbar}{mc}$       | $l_p$ |                       | $\frac{m_0}{m_p}$ |               | $\lambda = l_p \frac{m_p}{m_0}$                       |
| de Broglie wavelength | $\lambda = \frac{\hbar}{mv}$         | $l_p$ |                       | $\frac{m_0}{m_p}$ | $\frac{v}{c}$ | $\lambda = l_p \frac{m_p}{m_0} \frac{c}{v}$           |
| Momentum              | $p=mv$                               | $p_p$ | $\frac{l_p}{\lambda}$ |                   |               | $p=p_p \frac{l_p}{\lambda}$                           |
| Kinetic energy        | $E_k = \frac{1}{2}mv^2$              | $E_p$ | $\frac{l_p}{\lambda}$ |                   | $\frac{v}{c}$ | $E_k=E_p \frac{1}{2} \frac{l_p}{\lambda} \frac{v}{c}$ |

Gravitation

|                                      |                                                   |                   |                                 |                               |  |                                                                                |
|--------------------------------------|---------------------------------------------------|-------------------|---------------------------------|-------------------------------|--|--------------------------------------------------------------------------------|
| Schwarzschild radius                 | $r_s = \frac{2GM}{c^2}$                           | $l_p$             |                                 | $\frac{M}{m_p}$               |  | $r = l_p \ 2 \frac{M}{m_p}$                                                    |
| Escape velocity                      | $v_e = \left(\frac{-2GM}{r}\right)^{\frac{1}{2}}$ | $\frac{l_p}{t_p}$ | $\frac{l_p}{r}$                 | $\frac{M}{m_p}$               |  | $v = \frac{l_p}{t_p} \left(2 \frac{l_p}{r} \frac{M}{m_p}\right)^{\frac{1}{2}}$ |
| Energy potential                     | $U_g = \frac{-GMm}{r}$                            | $E_p$             | $\frac{l_p}{r}$                 | $\frac{M}{m_p} \frac{m}{m_p}$ |  | $E=E_p \frac{l_p}{r} \frac{M}{m_p} \frac{m}{m_p}$                              |
| Acceleration potential               | $g = \frac{-GM}{r^2}$                             | $a_p$             | $\frac{l_p}{r} \ \frac{l_p}{r}$ | $\frac{M}{m_p}$               |  | $a=a_p \frac{l_p}{r} \frac{l_p}{r} \frac{M}{m_p}$                              |
| Force potential                      | $F = \frac{-GMm}{r^2}$                            | $F_p$             | $\frac{l_p}{r} \ \frac{l_p}{r}$ | $\frac{M}{m_p} \frac{m}{m_p}$ |  | $F=F_p \frac{l_p}{r} \frac{l_p}{r} \frac{M}{m_p} \frac{m}{m_p}$                |
| Black hole energy (k <sub>B</sub> T) | $k_B T = \frac{\hbar c^3}{8\pi GM}$               | $E_p$             |                                 | $\frac{m_p}{M}$               |  | $E=E_p \frac{1}{8\pi} \frac{m_p}{M}$                                           |

Electromagnetism

|                         |                             |       |                                 |  |                                 |                                                                     |
|-------------------------|-----------------------------|-------|---------------------------------|--|---------------------------------|---------------------------------------------------------------------|
| Electrostatic potential | $F=k_e \frac{q_1 q_2}{r^2}$ | $F_p$ | $\frac{l_p}{r} \ \frac{l_p}{r}$ |  | $\frac{t_p}{t} \ \frac{t_p}{t}$ | $F=F_p \frac{l_p}{r} \frac{l_p}{r} \frac{t^*}{t_p} \frac{t^*}{t_p}$ |
|-------------------------|-----------------------------|-------|---------------------------------|--|---------------------------------|---------------------------------------------------------------------|

$l_p$  = Planck length

$t_p$  = Planck time

$E_p$  = Planck energy

$F_p$  = Planck force

$m_p$  = Planck mass

$p_p$  = Planck momentum

$a_p$  = Planck acceleration

\*1  $C = 2.874 \times 10^{-26} \ s$
